# Supplementary material for: Model-Based Approach for Designing an Efficient Bioequivalence Study for Highly Variable Drugs
Source: MDPI journal article supplement (doi:10.3390/ph14111101), 2021-10-28
Supplement: s1 [file s1]

**Table S3.** Comparison of power among clinical trial designs by correlation coefficient of bioavailability (F) between reference and test drugs: The simulation results are summarized in Figure 5.

| Agency | Correlation | Design | CV  | GMR | Total number of subject | Total number of hospitalization (N) | Power |
|--------|-------------|--------|-----|-----|-------------------------|-------------------------------------|-------|
| EMA    | 0.7         | 2x2    | 0.3 | 1   | 12                      | 24                                  | 0.002 |
| EMA    | 0.7         | 2x2    | 0.3 | 1   | 16                      | 32                                  | 0.004 |
| EMA    | 0.7         | 2x2    | 0.3 | 1   | 24                      | 48                                  | 0.039 |
| EMA    | 0.7         | 2x2    | 0.3 | 1   | 28                      | 56                                  | 0.077 |
| EMA    | 0.7         | 2x2    | 0.3 | 1   | 32                      | 64                                  | 0.136 |
| EMA    | 0.7         | 2x2    | 0.3 | 1   | 36                      | 72                                  | 0.183 |
| EMA    | 0.7         | 2x2    | 0.3 | 1   | 40                      | 80                                  | 0.257 |
| EMA    | 0.7         | 2x2    | 0.3 | 1   | 44                      | 88                                  | 0.303 |
| EMA    | 0.7         | 2x2    | 0.3 | 1   | 60                      | 120                                 | 0.56  |
| EMA    | 0.7         | 2x2    | 0.3 | 1   | 72                      | 144                                 | 0.717 |
| EMA    | 0.7         | 2x2    | 0.3 | 1   | 80                      | 160                                 | 0.771 |
| EMA    | 0.7         | 2x2    | 0.3 | 1   | 88                      | 176                                 | 0.823 |
| EMA    | 0.7         | 2x2    | 0.3 | 1   | 100                     | 200                                 | 0.864 |
| EMA    | 0.7         | 2x2    | 0.3 | 1   | 108                     | 216                                 | 0.912 |
| EMA    | 0.7         | 2x2    | 0.3 | 1   | 120                     | 240                                 | 0.945 |
| EMA    | 0.7         | 2x2    | 0.3 | 1   | 132                     | 264                                 | 0.959 |
| EMA    | 0.7         | 2x2    | 0.3 | 1   | 144                     | 288                                 | 0.969 |
| EMA    | 0.7         | 2x2    | 0.3 | 1   | 160                     | 320                                 | 0.983 |
| EMA    | 0.7         | 3x3    | 0.3 | 1   | 9                       | 27                                  | 0.002 |
| EMA    | 0.7         | 3x3    | 0.3 | 1   | 12                      | 36                                  | 0.019 |
| EMA    | 0.7         | 3x3    | 0.3 | 1   | 15                      | 45                                  | 0.039 |
| EMA    | 0.7         | 3x3    | 0.3 | 1   | 18                      | 54                                  | 0.081 |
| EMA    | 0.7         | 3x3    | 0.3 | 1   | 21                      | 63                                  | 0.18  |
| EMA    | 0.7         | 3x3    | 0.3 | 1   | 24                      | 72                                  | 0.232 |
| EMA    | 0.7         | 3x3    | 0.3 | 1   | 27                      | 81                                  | 0.333 |
| EMA    | 0.7         | 3x3    | 0.3 | 1   | 30                      | 90                                  | 0.374 |
| EMA    | 0.7         | 3x3    | 0.3 | 1   | 39                      | 117                                 | 0.56  |
| EMA    | 0.7         | 3x3    | 0.3 | 1   | 48                      | 144                                 | 0.696 |
| EMA    | 0.7         | 3x3    | 0.3 | 1   | 54                      | 162                                 | 0.762 |
| EMA    | 0.7         | 3x3    | 0.3 | 1   | 60                      | 180                                 | 0.826 |
| EMA    | 0.7         | 3x3    | 0.3 | 1   | 66                      | 198                                 | 0.856 |
| EMA    | 0.7         | 3x3    | 0.3 | 1   | 75                      | 225                                 | 0.903 |
| EMA    | 0.7         | 3x3    | 0.3 | 1   | 81                      | 243                                 | 0.935 |
| EMA    | 0.7         | 3x3    | 0.3 | 1   | 90                      | 270                                 | 0.945 |
| EMA    | 0.7         | 3x3    | 0.3 | 1   | 96                      | 288                                 | 0.951 |
| EMA    | 0.7         | 3x3    | 0.3 | 1   | 105                     | 315                                 | 0.96  |
| EMA    | 0.7         | 2x4    | 0.3 | 1   | 6                       | 24                                  | 0.003 |

|     |     |     |     |   |     |     |       |
|-----|-----|-----|-----|---|-----|-----|-------|
| EMA | 0.7 | 2x4 | 0.3 | 1 | 8   | 32  | 0.022 |
| EMA | 0.7 | 2x4 | 0.3 | 1 | 12  | 48  | 0.072 |
| EMA | 0.7 | 2x4 | 0.3 | 1 | 14  | 56  | 0.143 |
| EMA | 0.7 | 2x4 | 0.3 | 1 | 16  | 64  | 0.201 |
| EMA | 0.7 | 2x4 | 0.3 | 1 | 18  | 72  | 0.269 |
| EMA | 0.7 | 2x4 | 0.3 | 1 | 20  | 80  | 0.329 |
| EMA | 0.7 | 2x4 | 0.3 | 1 | 22  | 88  | 0.383 |
| EMA | 0.7 | 2x4 | 0.3 | 1 | 30  | 120 | 0.601 |
| EMA | 0.7 | 2x4 | 0.3 | 1 | 36  | 144 | 0.714 |
| EMA | 0.7 | 2x4 | 0.3 | 1 | 40  | 160 | 0.755 |
| EMA | 0.7 | 2x4 | 0.3 | 1 | 44  | 176 | 0.803 |
| EMA | 0.7 | 2x4 | 0.3 | 1 | 50  | 200 | 0.831 |
| EMA | 0.7 | 2x4 | 0.3 | 1 | 54  | 216 | 0.884 |
| EMA | 0.7 | 2x4 | 0.3 | 1 | 60  | 240 | 0.911 |
| EMA | 0.7 | 2x4 | 0.3 | 1 | 66  | 264 | 0.924 |
| EMA | 0.7 | 2x4 | 0.3 | 1 | 72  | 288 | 0.952 |
| EMA | 0.7 | 2x4 | 0.3 | 1 | 80  | 320 | 0.968 |
| EMA | 0.9 | 2x2 | 0.3 | 1 | 12  | 24  | 0.018 |
| EMA | 0.9 | 2x2 | 0.3 | 1 | 16  | 32  | 0.044 |
| EMA | 0.9 | 2x2 | 0.3 | 1 | 24  | 48  | 0.228 |
| EMA | 0.9 | 2x2 | 0.3 | 1 | 28  | 56  | 0.338 |
| EMA | 0.9 | 2x2 | 0.3 | 1 | 32  | 64  | 0.445 |
| EMA | 0.9 | 2x2 | 0.3 | 1 | 36  | 72  | 0.53  |
| EMA | 0.9 | 2x2 | 0.3 | 1 | 40  | 80  | 0.61  |
| EMA | 0.9 | 2x2 | 0.3 | 1 | 44  | 88  | 0.662 |
| EMA | 0.9 | 2x2 | 0.3 | 1 | 60  | 120 | 0.834 |
| EMA | 0.9 | 2x2 | 0.3 | 1 | 72  | 144 | 0.921 |
| EMA | 0.9 | 2x2 | 0.3 | 1 | 80  | 160 | 0.948 |
| EMA | 0.9 | 2x2 | 0.3 | 1 | 88  | 176 | 0.978 |
| EMA | 0.9 | 2x2 | 0.3 | 1 | 100 | 200 | 0.987 |
| EMA | 0.9 | 2x2 | 0.3 | 1 | 108 | 216 | 0.992 |
| EMA | 0.9 | 2x2 | 0.3 | 1 | 120 | 240 | 0.995 |
| EMA | 0.9 | 2x2 | 0.3 | 1 | 132 | 264 | 0.999 |
| EMA | 0.9 | 2x2 | 0.3 | 1 | 144 | 288 | 0.999 |
| EMA | 0.9 | 2x2 | 0.3 | 1 | 160 | 320 | 0.999 |
| EMA | 0.9 | 3x3 | 0.3 | 1 | 9   | 27  | 0.018 |
| EMA | 0.9 | 3x3 | 0.3 | 1 | 12  | 36  | 0.089 |
| EMA | 0.9 | 3x3 | 0.3 | 1 | 15  | 45  | 0.206 |
| EMA | 0.9 | 3x3 | 0.3 | 1 | 18  | 54  | 0.321 |
| EMA | 0.9 | 3x3 | 0.3 | 1 | 21  | 63  | 0.43  |
| EMA | 0.9 | 3x3 | 0.3 | 1 | 24  | 72  | 0.507 |

|     |     |     |     |   |     |     |       |
|-----|-----|-----|-----|---|-----|-----|-------|
| EMA | 0.9 | 3x3 | 0.3 | 1 | 27  | 81  | 0.628 |
| EMA | 0.9 | 3x3 | 0.3 | 1 | 30  | 90  | 0.689 |
| EMA | 0.9 | 3x3 | 0.3 | 1 | 39  | 117 | 0.785 |
| EMA | 0.9 | 3x3 | 0.3 | 1 | 48  | 144 | 0.912 |
| EMA | 0.9 | 3x3 | 0.3 | 1 | 54  | 162 | 0.926 |
| EMA | 0.9 | 3x3 | 0.3 | 1 | 60  | 180 | 0.966 |
| EMA | 0.9 | 3x3 | 0.3 | 1 | 66  | 198 | 0.977 |
| EMA | 0.9 | 3x3 | 0.3 | 1 | 75  | 225 | 0.989 |
| EMA | 0.9 | 3x3 | 0.3 | 1 | 81  | 243 | 0.994 |
| EMA | 0.9 | 3x3 | 0.3 | 1 | 90  | 270 | 0.995 |
| EMA | 0.9 | 3x3 | 0.3 | 1 | 96  | 288 | 0.998 |
| EMA | 0.9 | 3x3 | 0.3 | 1 | 105 | 315 | 0.997 |
| EMA | 0.9 | 2x4 | 0.3 | 1 | 6   | 24  | 0.024 |
| EMA | 0.9 | 2x4 | 0.3 | 1 | 8   | 32  | 0.081 |
| EMA | 0.9 | 2x4 | 0.3 | 1 | 12  | 48  | 0.263 |
| EMA | 0.9 | 2x4 | 0.3 | 1 | 14  | 56  | 0.402 |
| EMA | 0.9 | 2x4 | 0.3 | 1 | 16  | 64  | 0.473 |
| EMA | 0.9 | 2x4 | 0.3 | 1 | 18  | 72  | 0.554 |
| EMA | 0.9 | 2x4 | 0.3 | 1 | 20  | 80  | 0.64  |
| EMA | 0.9 | 2x4 | 0.3 | 1 | 22  | 88  | 0.684 |
| EMA | 0.9 | 2x4 | 0.3 | 1 | 30  | 120 | 0.833 |
| EMA | 0.9 | 2x4 | 0.3 | 1 | 36  | 144 | 0.902 |
| EMA | 0.9 | 2x4 | 0.3 | 1 | 40  | 160 | 0.939 |
| EMA | 0.9 | 2x4 | 0.3 | 1 | 44  | 176 | 0.964 |
| EMA | 0.9 | 2x4 | 0.3 | 1 | 50  | 200 | 0.977 |
| EMA | 0.9 | 2x4 | 0.3 | 1 | 54  | 216 | 0.988 |
| EMA | 0.9 | 2x4 | 0.3 | 1 | 60  | 240 | 0.987 |
| EMA | 0.9 | 2x4 | 0.3 | 1 | 66  | 264 | 0.999 |
| EMA | 0.9 | 2x4 | 0.3 | 1 | 72  | 288 | 0.998 |
| EMA | 0.9 | 2x4 | 0.3 | 1 | 80  | 320 | 0.999 |
| EMA | 1   | 2x2 | 0.3 | 1 | 12  | 24  | 0.071 |
| EMA | 1   | 2x2 | 0.3 | 1 | 16  | 32  | 0.154 |
| EMA | 1   | 2x2 | 0.3 | 1 | 24  | 48  | 0.437 |
| EMA | 1   | 2x2 | 0.3 | 1 | 28  | 56  | 0.592 |
| EMA | 1   | 2x2 | 0.3 | 1 | 32  | 64  | 0.702 |
| EMA | 1   | 2x2 | 0.3 | 1 | 36  | 72  | 0.77  |
| EMA | 1   | 2x2 | 0.3 | 1 | 40  | 80  | 0.829 |
| EMA | 1   | 2x2 | 0.3 | 1 | 44  | 88  | 0.862 |
| EMA | 1   | 2x2 | 0.3 | 1 | 60  | 120 | 0.967 |
| EMA | 1   | 2x2 | 0.3 | 1 | 72  | 144 | 0.987 |
| EMA | 1   | 2x2 | 0.3 | 1 | 80  | 160 | 0.994 |

|     |   |     |     |   |     |     |       |
|-----|---|-----|-----|---|-----|-----|-------|
| EMA | 1 | 2x2 | 0.3 | 1 | 88  | 176 | 0.996 |
| EMA | 1 | 2x2 | 0.3 | 1 | 100 | 200 | 0.998 |
| EMA | 1 | 2x2 | 0.3 | 1 | 108 | 216 | 0.999 |
| EMA | 1 | 2x2 | 0.3 | 1 | 120 | 240 | 0.999 |
| EMA | 1 | 2x2 | 0.3 | 1 | 132 | 264 | 1     |
| EMA | 1 | 2x2 | 0.3 | 1 | 144 | 288 | 1     |
| EMA | 1 | 2x2 | 0.3 | 1 | 160 | 320 | 1     |
| EMA | 1 | 3x3 | 0.3 | 1 | 9   | 27  | 0.07  |
| EMA | 1 | 3x3 | 0.3 | 1 | 12  | 36  | 0.209 |
| EMA | 1 | 3x3 | 0.3 | 1 | 15  | 45  | 0.403 |
| EMA | 1 | 3x3 | 0.3 | 1 | 18  | 54  | 0.524 |
| EMA | 1 | 3x3 | 0.3 | 1 | 21  | 63  | 0.641 |
| EMA | 1 | 3x3 | 0.3 | 1 | 24  | 72  | 0.735 |
| EMA | 1 | 3x3 | 0.3 | 1 | 27  | 81  | 0.822 |
| EMA | 1 | 3x3 | 0.3 | 1 | 30  | 90  | 0.866 |
| EMA | 1 | 3x3 | 0.3 | 1 | 39  | 117 | 0.945 |
| EMA | 1 | 3x3 | 0.3 | 1 | 48  | 144 | 0.974 |
| EMA | 1 | 3x3 | 0.3 | 1 | 54  | 162 | 0.992 |
| EMA | 1 | 3x3 | 0.3 | 1 | 60  | 180 | 0.996 |
| EMA | 1 | 3x3 | 0.3 | 1 | 66  | 198 | 0.996 |
| EMA | 1 | 3x3 | 0.3 | 1 | 75  | 225 | 1     |
| EMA | 1 | 3x3 | 0.3 | 1 | 81  | 243 | 1     |
| EMA | 1 | 3x3 | 0.3 | 1 | 90  | 270 | 1     |
| EMA | 1 | 3x3 | 0.3 | 1 | 96  | 288 | 1     |
| EMA | 1 | 3x3 | 0.3 | 1 | 105 | 315 | 1     |
| EMA | 1 | 2x4 | 0.3 | 1 | 6   | 24  | 0.084 |
| EMA | 1 | 2x4 | 0.3 | 1 | 8   | 32  | 0.205 |
| EMA | 1 | 2x4 | 0.3 | 1 | 12  | 48  | 0.509 |
| EMA | 1 | 2x4 | 0.3 | 1 | 14  | 56  | 0.639 |
| EMA | 1 | 2x4 | 0.3 | 1 | 16  | 64  | 0.736 |
| EMA | 1 | 2x4 | 0.3 | 1 | 18  | 72  | 0.807 |
| EMA | 1 | 2x4 | 0.3 | 1 | 20  | 80  | 0.85  |
| EMA | 1 | 2x4 | 0.3 | 1 | 22  | 88  | 0.869 |
| EMA | 1 | 2x4 | 0.3 | 1 | 30  | 120 | 0.979 |
| EMA | 1 | 2x4 | 0.3 | 1 | 36  | 144 | 0.986 |
| EMA | 1 | 2x4 | 0.3 | 1 | 40  | 160 | 0.995 |
| EMA | 1 | 2x4 | 0.3 | 1 | 44  | 176 | 0.999 |
| EMA | 1 | 2x4 | 0.3 | 1 | 50  | 200 | 0.998 |
| EMA | 1 | 2x4 | 0.3 | 1 | 54  | 216 | 1     |
| EMA | 1 | 2x4 | 0.3 | 1 | 60  | 240 | 1     |
| EMA | 1 | 2x4 | 0.3 | 1 | 66  | 264 | 1     |

|     |     |     |     |   |     |     |       |
|-----|-----|-----|-----|---|-----|-----|-------|
| EMA | 1   | 2x4 | 0.3 | 1 | 72  | 288 | 1     |
| EMA | 1   | 2x4 | 0.3 | 1 | 80  | 320 | 1     |
| FDA | 0.7 | 2x2 | 0.3 | 1 | 12  | 24  | 0.002 |
| FDA | 0.7 | 2x2 | 0.3 | 1 | 16  | 32  | 0.004 |
| FDA | 0.7 | 2x2 | 0.3 | 1 | 24  | 48  | 0.039 |
| FDA | 0.7 | 2x2 | 0.3 | 1 | 28  | 56  | 0.077 |
| FDA | 0.7 | 2x2 | 0.3 | 1 | 32  | 64  | 0.136 |
| FDA | 0.7 | 2x2 | 0.3 | 1 | 36  | 72  | 0.183 |
| FDA | 0.7 | 2x2 | 0.3 | 1 | 40  | 80  | 0.257 |
| FDA | 0.7 | 2x2 | 0.3 | 1 | 44  | 88  | 0.303 |
| FDA | 0.7 | 2x2 | 0.3 | 1 | 60  | 120 | 0.56  |
| FDA | 0.7 | 2x2 | 0.3 | 1 | 72  | 144 | 0.717 |
| FDA | 0.7 | 2x2 | 0.3 | 1 | 80  | 160 | 0.771 |
| FDA | 0.7 | 2x2 | 0.3 | 1 | 88  | 176 | 0.823 |
| FDA | 0.7 | 2x2 | 0.3 | 1 | 100 | 200 | 0.864 |
| FDA | 0.7 | 2x2 | 0.3 | 1 | 108 | 216 | 0.912 |
| FDA | 0.7 | 2x2 | 0.3 | 1 | 120 | 240 | 0.945 |
| FDA | 0.7 | 2x2 | 0.3 | 1 | 132 | 264 | 0.959 |
| FDA | 0.7 | 2x2 | 0.3 | 1 | 144 | 288 | 0.969 |
| FDA | 0.7 | 2x2 | 0.3 | 1 | 160 | 320 | 0.983 |
| FDA | 0.7 | 3x3 | 0.3 | 1 | 9   | 27  | 0.012 |
| FDA | 0.7 | 3x3 | 0.3 | 1 | 12  | 36  | 0.036 |
| FDA | 0.7 | 3x3 | 0.3 | 1 | 15  | 45  | 0.07  |
| FDA | 0.7 | 3x3 | 0.3 | 1 | 18  | 54  | 0.12  |
| FDA | 0.7 | 3x3 | 0.3 | 1 | 21  | 63  | 0.204 |
| FDA | 0.7 | 3x3 | 0.3 | 1 | 24  | 72  | 0.248 |
| FDA | 0.7 | 3x3 | 0.3 | 1 | 27  | 81  | 0.357 |
| FDA | 0.7 | 3x3 | 0.3 | 1 | 30  | 90  | 0.395 |
| FDA | 0.7 | 3x3 | 0.3 | 1 | 39  | 117 | 0.592 |
| FDA | 0.7 | 3x3 | 0.3 | 1 | 48  | 144 | 0.728 |
| FDA | 0.7 | 3x3 | 0.3 | 1 | 54  | 162 | 0.795 |
| FDA | 0.7 | 3x3 | 0.3 | 1 | 60  | 180 | 0.852 |
| FDA | 0.7 | 3x3 | 0.3 | 1 | 66  | 198 | 0.877 |
| FDA | 0.7 | 3x3 | 0.3 | 1 | 75  | 225 | 0.915 |
| FDA | 0.7 | 3x3 | 0.3 | 1 | 81  | 243 | 0.948 |
| FDA | 0.7 | 3x3 | 0.3 | 1 | 90  | 270 | 0.957 |
| FDA | 0.7 | 3x3 | 0.3 | 1 | 96  | 288 | 0.958 |
| FDA | 0.7 | 3x3 | 0.3 | 1 | 105 | 315 | 0.973 |
| FDA | 0.7 | 2x4 | 0.3 | 1 | 6   | 24  | 0.005 |
| FDA | 0.7 | 2x4 | 0.3 | 1 | 8   | 32  | 0.017 |
| FDA | 0.7 | 2x4 | 0.3 | 1 | 12  | 48  | 0.028 |

|     |     |     |     |   |     |     |       |
|-----|-----|-----|-----|---|-----|-----|-------|
| FDA | 0.7 | 2x4 | 0.3 | 1 | 14  | 56  | 0.048 |
| FDA | 0.7 | 2x4 | 0.3 | 1 | 16  | 64  | 0.058 |
| FDA | 0.7 | 2x4 | 0.3 | 1 | 18  | 72  | 0.105 |
| FDA | 0.7 | 2x4 | 0.3 | 1 | 20  | 80  | 0.122 |
| FDA | 0.7 | 2x4 | 0.3 | 1 | 22  | 88  | 0.176 |
| FDA | 0.7 | 2x4 | 0.3 | 1 | 30  | 120 | 0.325 |
| FDA | 0.7 | 2x4 | 0.3 | 1 | 36  | 144 | 0.504 |
| FDA | 0.7 | 2x4 | 0.3 | 1 | 40  | 160 | 0.581 |
| FDA | 0.7 | 2x4 | 0.3 | 1 | 44  | 176 | 0.621 |
| FDA | 0.7 | 2x4 | 0.3 | 1 | 50  | 200 | 0.687 |
| FDA | 0.7 | 2x4 | 0.3 | 1 | 54  | 216 | 0.753 |
| FDA | 0.7 | 2x4 | 0.3 | 1 | 60  | 240 | 0.82  |
| FDA | 0.7 | 2x4 | 0.3 | 1 | 66  | 264 | 0.858 |
| FDA | 0.7 | 2x4 | 0.3 | 1 | 72  | 288 | 0.901 |
| FDA | 0.7 | 2x4 | 0.3 | 1 | 80  | 320 | 0.91  |
| FDA | 0.9 | 2x2 | 0.3 | 1 | 12  | 24  | 0.018 |
| FDA | 0.9 | 2x2 | 0.3 | 1 | 16  | 32  | 0.044 |
| FDA | 0.9 | 2x2 | 0.3 | 1 | 24  | 48  | 0.228 |
| FDA | 0.9 | 2x2 | 0.3 | 1 | 28  | 56  | 0.338 |
| FDA | 0.9 | 2x2 | 0.3 | 1 | 32  | 64  | 0.445 |
| FDA | 0.9 | 2x2 | 0.3 | 1 | 36  | 72  | 0.53  |
| FDA | 0.9 | 2x2 | 0.3 | 1 | 40  | 80  | 0.61  |
| FDA | 0.9 | 2x2 | 0.3 | 1 | 44  | 88  | 0.662 |
| FDA | 0.9 | 2x2 | 0.3 | 1 | 60  | 120 | 0.834 |
| FDA | 0.9 | 2x2 | 0.3 | 1 | 72  | 144 | 0.921 |
| FDA | 0.9 | 2x2 | 0.3 | 1 | 80  | 160 | 0.948 |
| FDA | 0.9 | 2x2 | 0.3 | 1 | 88  | 176 | 0.978 |
| FDA | 0.9 | 2x2 | 0.3 | 1 | 100 | 200 | 0.987 |
| FDA | 0.9 | 2x2 | 0.3 | 1 | 108 | 216 | 0.992 |
| FDA | 0.9 | 2x2 | 0.3 | 1 | 120 | 240 | 0.995 |
| FDA | 0.9 | 2x2 | 0.3 | 1 | 132 | 264 | 0.999 |
| FDA | 0.9 | 2x2 | 0.3 | 1 | 144 | 288 | 0.999 |
| FDA | 0.9 | 2x2 | 0.3 | 1 | 160 | 320 | 0.999 |
| FDA | 0.9 | 3x3 | 0.3 | 1 | 9   | 27  | 0.07  |
| FDA | 0.9 | 3x3 | 0.3 | 1 | 12  | 36  | 0.145 |
| FDA | 0.9 | 3x3 | 0.3 | 1 | 15  | 45  | 0.276 |
| FDA | 0.9 | 3x3 | 0.3 | 1 | 18  | 54  | 0.389 |
| FDA | 0.9 | 3x3 | 0.3 | 1 | 21  | 63  | 0.494 |
| FDA | 0.9 | 3x3 | 0.3 | 1 | 24  | 72  | 0.579 |
| FDA | 0.9 | 3x3 | 0.3 | 1 | 27  | 81  | 0.677 |
| FDA | 0.9 | 3x3 | 0.3 | 1 | 30  | 90  | 0.749 |

|     |     |     |     |   |     |     |       |
|-----|-----|-----|-----|---|-----|-----|-------|
| FDA | 0.9 | 3x3 | 0.3 | 1 | 39  | 117 | 0.832 |
| FDA | 0.9 | 3x3 | 0.3 | 1 | 48  | 144 | 0.937 |
| FDA | 0.9 | 3x3 | 0.3 | 1 | 54  | 162 | 0.943 |
| FDA | 0.9 | 3x3 | 0.3 | 1 | 60  | 180 | 0.977 |
| FDA | 0.9 | 3x3 | 0.3 | 1 | 66  | 198 | 0.985 |
| FDA | 0.9 | 3x3 | 0.3 | 1 | 75  | 225 | 0.992 |
| FDA | 0.9 | 3x3 | 0.3 | 1 | 81  | 243 | 0.995 |
| FDA | 0.9 | 3x3 | 0.3 | 1 | 90  | 270 | 0.995 |
| FDA | 0.9 | 3x3 | 0.3 | 1 | 96  | 288 | 0.999 |
| FDA | 0.9 | 3x3 | 0.3 | 1 | 105 | 315 | 0.998 |
| FDA | 0.9 | 2x4 | 0.3 | 1 | 6   | 24  | 0.041 |
| FDA | 0.9 | 2x4 | 0.3 | 1 | 8   | 32  | 0.058 |
| FDA | 0.9 | 2x4 | 0.3 | 1 | 12  | 48  | 0.15  |
| FDA | 0.9 | 2x4 | 0.3 | 1 | 14  | 56  | 0.234 |
| FDA | 0.9 | 2x4 | 0.3 | 1 | 16  | 64  | 0.308 |
| FDA | 0.9 | 2x4 | 0.3 | 1 | 18  | 72  | 0.399 |
| FDA | 0.9 | 2x4 | 0.3 | 1 | 20  | 80  | 0.471 |
| FDA | 0.9 | 2x4 | 0.3 | 1 | 22  | 88  | 0.557 |
| FDA | 0.9 | 2x4 | 0.3 | 1 | 30  | 120 | 0.764 |
| FDA | 0.9 | 2x4 | 0.3 | 1 | 36  | 144 | 0.855 |
| FDA | 0.9 | 2x4 | 0.3 | 1 | 40  | 160 | 0.89  |
| FDA | 0.9 | 2x4 | 0.3 | 1 | 44  | 176 | 0.93  |
| FDA | 0.9 | 2x4 | 0.3 | 1 | 50  | 200 | 0.949 |
| FDA | 0.9 | 2x4 | 0.3 | 1 | 54  | 216 | 0.965 |
| FDA | 0.9 | 2x4 | 0.3 | 1 | 60  | 240 | 0.982 |
| FDA | 0.9 | 2x4 | 0.3 | 1 | 66  | 264 | 0.992 |
| FDA | 0.9 | 2x4 | 0.3 | 1 | 72  | 288 | 0.993 |
| FDA | 0.9 | 2x4 | 0.3 | 1 | 80  | 320 | 0.996 |
| FDA | 1   | 2x2 | 0.3 | 1 | 12  | 24  | 0.071 |
| FDA | 1   | 2x2 | 0.3 | 1 | 16  | 32  | 0.154 |
| FDA | 1   | 2x2 | 0.3 | 1 | 24  | 48  | 0.437 |
| FDA | 1   | 2x2 | 0.3 | 1 | 28  | 56  | 0.592 |
| FDA | 1   | 2x2 | 0.3 | 1 | 32  | 64  | 0.702 |
| FDA | 1   | 2x2 | 0.3 | 1 | 36  | 72  | 0.77  |
| FDA | 1   | 2x2 | 0.3 | 1 | 40  | 80  | 0.829 |
| FDA | 1   | 2x2 | 0.3 | 1 | 44  | 88  | 0.862 |
| FDA | 1   | 2x2 | 0.3 | 1 | 60  | 120 | 0.967 |
| FDA | 1   | 2x2 | 0.3 | 1 | 72  | 144 | 0.987 |
| FDA | 1   | 2x2 | 0.3 | 1 | 80  | 160 | 0.994 |
| FDA | 1   | 2x2 | 0.3 | 1 | 88  | 176 | 0.996 |
| FDA | 1   | 2x2 | 0.3 | 1 | 100 | 200 | 0.998 |

|     |   |     |     |   |     |     |       |
|-----|---|-----|-----|---|-----|-----|-------|
| FDA | 1 | 2x2 | 0.3 | 1 | 108 | 216 | 0.999 |
| FDA | 1 | 2x2 | 0.3 | 1 | 120 | 240 | 0.999 |
| FDA | 1 | 2x2 | 0.3 | 1 | 132 | 264 | 1     |
| FDA | 1 | 2x2 | 0.3 | 1 | 144 | 288 | 1     |
| FDA | 1 | 2x2 | 0.3 | 1 | 160 | 320 | 1     |
| FDA | 1 | 3x3 | 0.3 | 1 | 9   | 27  | 0.177 |
| FDA | 1 | 3x3 | 0.3 | 1 | 12  | 36  | 0.334 |
| FDA | 1 | 3x3 | 0.3 | 1 | 15  | 45  | 0.506 |
| FDA | 1 | 3x3 | 0.3 | 1 | 18  | 54  | 0.617 |
| FDA | 1 | 3x3 | 0.3 | 1 | 21  | 63  | 0.732 |
| FDA | 1 | 3x3 | 0.3 | 1 | 24  | 72  | 0.791 |
| FDA | 1 | 3x3 | 0.3 | 1 | 27  | 81  | 0.871 |
| FDA | 1 | 3x3 | 0.3 | 1 | 30  | 90  | 0.897 |
| FDA | 1 | 3x3 | 0.3 | 1 | 39  | 117 | 0.964 |
| FDA | 1 | 3x3 | 0.3 | 1 | 48  | 144 | 0.98  |
| FDA | 1 | 3x3 | 0.3 | 1 | 54  | 162 | 0.995 |
| FDA | 1 | 3x3 | 0.3 | 1 | 60  | 180 | 0.996 |
| FDA | 1 | 3x3 | 0.3 | 1 | 66  | 198 | 0.997 |
| FDA | 1 | 3x3 | 0.3 | 1 | 75  | 225 | 1     |
| FDA | 1 | 3x3 | 0.3 | 1 | 81  | 243 | 1     |
| FDA | 1 | 3x3 | 0.3 | 1 | 90  | 270 | 1     |
| FDA | 1 | 3x3 | 0.3 | 1 | 96  | 288 | 1     |
| FDA | 1 | 3x3 | 0.3 | 1 | 105 | 315 | 1     |
| FDA | 1 | 2x4 | 0.3 | 1 | 6   | 24  | 0.114 |
| FDA | 1 | 2x4 | 0.3 | 1 | 8   | 32  | 0.201 |
| FDA | 1 | 2x4 | 0.3 | 1 | 12  | 48  | 0.456 |
| FDA | 1 | 2x4 | 0.3 | 1 | 14  | 56  | 0.573 |
| FDA | 1 | 2x4 | 0.3 | 1 | 16  | 64  | 0.705 |
| FDA | 1 | 2x4 | 0.3 | 1 | 18  | 72  | 0.784 |
| FDA | 1 | 2x4 | 0.3 | 1 | 20  | 80  | 0.833 |
| FDA | 1 | 2x4 | 0.3 | 1 | 22  | 88  | 0.854 |
| FDA | 1 | 2x4 | 0.3 | 1 | 30  | 120 | 0.968 |
| FDA | 1 | 2x4 | 0.3 | 1 | 36  | 144 | 0.982 |
| FDA | 1 | 2x4 | 0.3 | 1 | 40  | 160 | 0.995 |
| FDA | 1 | 2x4 | 0.3 | 1 | 44  | 176 | 0.998 |
| FDA | 1 | 2x4 | 0.3 | 1 | 50  | 200 | 0.996 |
| FDA | 1 | 2x4 | 0.3 | 1 | 54  | 216 | 1     |
| FDA | 1 | 2x4 | 0.3 | 1 | 60  | 240 | 1     |
| FDA | 1 | 2x4 | 0.3 | 1 | 66  | 264 | 1     |
| FDA | 1 | 2x4 | 0.3 | 1 | 72  | 288 | 1     |
| FDA | 1 | 2x4 | 0.3 | 1 | 80  | 320 | 1     |



**Table A4.** Comparison of power among clinical trial designs by correlation coefficient of absorption rate constant (Ka) between reference and test drugs: The simulation results are summarized in Figure 5.

| Agency | Correlation | Design | CV  | GMR | Total number of subject | Total number of hospitalization (N) | Power |
|--------|-------------|--------|-----|-----|-------------------------|-------------------------------------|-------|
| EMA    | 0.7         | 2x2    | 0.3 | 1   | 12                      | 24                                  | 0.015 |
| EMA    | 0.7         | 2x2    | 0.3 | 1   | 16                      | 32                                  | 0.034 |
| EMA    | 0.7         | 2x2    | 0.3 | 1   | 24                      | 48                                  | 0.2   |
| EMA    | 0.7         | 2x2    | 0.3 | 1   | 28                      | 56                                  | 0.305 |
| EMA    | 0.7         | 2x2    | 0.3 | 1   | 32                      | 64                                  | 0.419 |
| EMA    | 0.7         | 2x2    | 0.3 | 1   | 36                      | 72                                  | 0.506 |
| EMA    | 0.7         | 2x2    | 0.3 | 1   | 40                      | 80                                  | 0.591 |
| EMA    | 0.7         | 2x2    | 0.3 | 1   | 44                      | 88                                  | 0.631 |
| EMA    | 0.7         | 2x2    | 0.3 | 1   | 60                      | 120                                 | 0.819 |
| EMA    | 0.7         | 2x2    | 0.3 | 1   | 72                      | 144                                 | 0.913 |
| EMA    | 0.7         | 2x2    | 0.3 | 1   | 80                      | 160                                 | 0.938 |
| EMA    | 0.7         | 2x2    | 0.3 | 1   | 88                      | 176                                 | 0.973 |
| EMA    | 0.7         | 2x2    | 0.3 | 1   | 100                     | 200                                 | 0.985 |
| EMA    | 0.7         | 2x2    | 0.3 | 1   | 108                     | 216                                 | 0.989 |
| EMA    | 0.7         | 2x2    | 0.3 | 1   | 120                     | 240                                 | 0.994 |
| EMA    | 0.7         | 2x2    | 0.3 | 1   | 132                     | 264                                 | 0.999 |
| EMA    | 0.7         | 2x2    | 0.3 | 1   | 144                     | 288                                 | 0.999 |
| EMA    | 0.7         | 2x2    | 0.3 | 1   | 160                     | 320                                 | 0.999 |
| EMA    | 0.7         | 3x3    | 0.3 | 1   | 9                       | 27                                  | 0.015 |
| EMA    | 0.7         | 3x3    | 0.3 | 1   | 12                      | 36                                  | 0.074 |
| EMA    | 0.7         | 3x3    | 0.3 | 1   | 15                      | 45                                  | 0.195 |
| EMA    | 0.7         | 3x3    | 0.3 | 1   | 18                      | 54                                  | 0.295 |
| EMA    | 0.7         | 3x3    | 0.3 | 1   | 21                      | 63                                  | 0.411 |
| EMA    | 0.7         | 3x3    | 0.3 | 1   | 24                      | 72                                  | 0.483 |
| EMA    | 0.7         | 3x3    | 0.3 | 1   | 27                      | 81                                  | 0.608 |
| EMA    | 0.7         | 3x3    | 0.3 | 1   | 30                      | 90                                  | 0.668 |
| EMA    | 0.7         | 3x3    | 0.3 | 1   | 39                      | 117                                 | 0.778 |
| EMA    | 0.7         | 3x3    | 0.3 | 1   | 48                      | 144                                 | 0.902 |
| EMA    | 0.7         | 3x3    | 0.3 | 1   | 54                      | 162                                 | 0.916 |
| EMA    | 0.7         | 3x3    | 0.3 | 1   | 60                      | 180                                 | 0.965 |
| EMA    | 0.7         | 3x3    | 0.3 | 1   | 66                      | 198                                 | 0.973 |
| EMA    | 0.7         | 3x3    | 0.3 | 1   | 75                      | 225                                 | 0.989 |
| EMA    | 0.7         | 3x3    | 0.3 | 1   | 81                      | 243                                 | 0.994 |
| EMA    | 0.7         | 3x3    | 0.3 | 1   | 90                      | 270                                 | 0.994 |
| EMA    | 0.7         | 3x3    | 0.3 | 1   | 96                      | 288                                 | 0.996 |
| EMA    | 0.7         | 3x3    | 0.3 | 1   | 105                     | 315                                 | 0.995 |
| EMA    | 0.7         | 2x4    | 0.3 | 1   | 6                       | 24                                  | 0.022 |

|     |     |     |     |   |     |     |       |
|-----|-----|-----|-----|---|-----|-----|-------|
| EMA | 0.7 | 2x4 | 0.3 | 1 | 8   | 32  | 0.066 |
| EMA | 0.7 | 2x4 | 0.3 | 1 | 12  | 48  | 0.243 |
| EMA | 0.7 | 2x4 | 0.3 | 1 | 14  | 56  | 0.38  |
| EMA | 0.7 | 2x4 | 0.3 | 1 | 16  | 64  | 0.454 |
| EMA | 0.7 | 2x4 | 0.3 | 1 | 18  | 72  | 0.537 |
| EMA | 0.7 | 2x4 | 0.3 | 1 | 20  | 80  | 0.618 |
| EMA | 0.7 | 2x4 | 0.3 | 1 | 22  | 88  | 0.663 |
| EMA | 0.7 | 2x4 | 0.3 | 1 | 30  | 120 | 0.821 |
| EMA | 0.7 | 2x4 | 0.3 | 1 | 36  | 144 | 0.892 |
| EMA | 0.7 | 2x4 | 0.3 | 1 | 40  | 160 | 0.934 |
| EMA | 0.7 | 2x4 | 0.3 | 1 | 44  | 176 | 0.958 |
| EMA | 0.7 | 2x4 | 0.3 | 1 | 50  | 200 | 0.973 |
| EMA | 0.7 | 2x4 | 0.3 | 1 | 54  | 216 | 0.985 |
| EMA | 0.7 | 2x4 | 0.3 | 1 | 60  | 240 | 0.984 |
| EMA | 0.7 | 2x4 | 0.3 | 1 | 66  | 264 | 0.998 |
| EMA | 0.7 | 2x4 | 0.3 | 1 | 72  | 288 | 0.995 |
| EMA | 0.7 | 2x4 | 0.3 | 1 | 80  | 320 | 0.998 |
| EMA | 0.8 | 2x2 | 0.3 | 1 | 12  | 24  | 0.018 |
| EMA | 0.8 | 2x2 | 0.3 | 1 | 16  | 32  | 0.044 |
| EMA | 0.8 | 2x2 | 0.3 | 1 | 24  | 48  | 0.228 |
| EMA | 0.8 | 2x2 | 0.3 | 1 | 28  | 56  | 0.338 |
| EMA | 0.8 | 2x2 | 0.3 | 1 | 32  | 64  | 0.445 |
| EMA | 0.8 | 2x2 | 0.3 | 1 | 36  | 72  | 0.53  |
| EMA | 0.8 | 2x2 | 0.3 | 1 | 40  | 80  | 0.61  |
| EMA | 0.8 | 2x2 | 0.3 | 1 | 44  | 88  | 0.662 |
| EMA | 0.8 | 2x2 | 0.3 | 1 | 60  | 120 | 0.834 |
| EMA | 0.8 | 2x2 | 0.3 | 1 | 72  | 144 | 0.921 |
| EMA | 0.8 | 2x2 | 0.3 | 1 | 80  | 160 | 0.948 |
| EMA | 0.8 | 2x2 | 0.3 | 1 | 88  | 176 | 0.978 |
| EMA | 0.8 | 2x2 | 0.3 | 1 | 100 | 200 | 0.987 |
| EMA | 0.8 | 2x2 | 0.3 | 1 | 108 | 216 | 0.992 |
| EMA | 0.8 | 2x2 | 0.3 | 1 | 120 | 240 | 0.995 |
| EMA | 0.8 | 2x2 | 0.3 | 1 | 132 | 264 | 0.999 |
| EMA | 0.8 | 2x2 | 0.3 | 1 | 144 | 288 | 0.999 |
| EMA | 0.8 | 2x2 | 0.3 | 1 | 160 | 320 | 0.999 |
| EMA | 0.8 | 3x3 | 0.3 | 1 | 9   | 27  | 0.018 |
| EMA | 0.8 | 3x3 | 0.3 | 1 | 12  | 36  | 0.089 |
| EMA | 0.8 | 3x3 | 0.3 | 1 | 15  | 45  | 0.206 |
| EMA | 0.8 | 3x3 | 0.3 | 1 | 18  | 54  | 0.321 |
| EMA | 0.8 | 3x3 | 0.3 | 1 | 21  | 63  | 0.43  |
| EMA | 0.8 | 3x3 | 0.3 | 1 | 24  | 72  | 0.507 |

|     |     |     |     |   |     |     |       |
|-----|-----|-----|-----|---|-----|-----|-------|
| EMA | 0.8 | 3x3 | 0.3 | 1 | 27  | 81  | 0.628 |
| EMA | 0.8 | 3x3 | 0.3 | 1 | 30  | 90  | 0.689 |
| EMA | 0.8 | 3x3 | 0.3 | 1 | 39  | 117 | 0.785 |
| EMA | 0.8 | 3x3 | 0.3 | 1 | 48  | 144 | 0.912 |
| EMA | 0.8 | 3x3 | 0.3 | 1 | 54  | 162 | 0.926 |
| EMA | 0.8 | 3x3 | 0.3 | 1 | 60  | 180 | 0.966 |
| EMA | 0.8 | 3x3 | 0.3 | 1 | 66  | 198 | 0.977 |
| EMA | 0.8 | 3x3 | 0.3 | 1 | 75  | 225 | 0.989 |
| EMA | 0.8 | 3x3 | 0.3 | 1 | 81  | 243 | 0.994 |
| EMA | 0.8 | 3x3 | 0.3 | 1 | 90  | 270 | 0.995 |
| EMA | 0.8 | 3x3 | 0.3 | 1 | 96  | 288 | 0.998 |
| EMA | 0.8 | 3x3 | 0.3 | 1 | 105 | 315 | 0.997 |
| EMA | 0.8 | 2x4 | 0.3 | 1 | 6   | 24  | 0.024 |
| EMA | 0.8 | 2x4 | 0.3 | 1 | 8   | 32  | 0.081 |
| EMA | 0.8 | 2x4 | 0.3 | 1 | 12  | 48  | 0.263 |
| EMA | 0.8 | 2x4 | 0.3 | 1 | 14  | 56  | 0.402 |
| EMA | 0.8 | 2x4 | 0.3 | 1 | 16  | 64  | 0.473 |
| EMA | 0.8 | 2x4 | 0.3 | 1 | 18  | 72  | 0.554 |
| EMA | 0.8 | 2x4 | 0.3 | 1 | 20  | 80  | 0.64  |
| EMA | 0.8 | 2x4 | 0.3 | 1 | 22  | 88  | 0.684 |
| EMA | 0.8 | 2x4 | 0.3 | 1 | 30  | 120 | 0.833 |
| EMA | 0.8 | 2x4 | 0.3 | 1 | 36  | 144 | 0.902 |
| EMA | 0.8 | 2x4 | 0.3 | 1 | 40  | 160 | 0.939 |
| EMA | 0.8 | 2x4 | 0.3 | 1 | 44  | 176 | 0.964 |
| EMA | 0.8 | 2x4 | 0.3 | 1 | 50  | 200 | 0.977 |
| EMA | 0.8 | 2x4 | 0.3 | 1 | 54  | 216 | 0.988 |
| EMA | 0.8 | 2x4 | 0.3 | 1 | 60  | 240 | 0.987 |
| EMA | 0.8 | 2x4 | 0.3 | 1 | 66  | 264 | 0.999 |
| EMA | 0.8 | 2x4 | 0.3 | 1 | 72  | 288 | 0.998 |
| EMA | 0.8 | 2x4 | 0.3 | 1 | 80  | 320 | 0.999 |
| EMA | 1   | 2x2 | 0.3 | 1 | 12  | 24  | 0.034 |
| EMA | 1   | 2x2 | 0.3 | 1 | 16  | 32  | 0.068 |
| EMA | 1   | 2x2 | 0.3 | 1 | 24  | 48  | 0.268 |
| EMA | 1   | 2x2 | 0.3 | 1 | 28  | 56  | 0.393 |
| EMA | 1   | 2x2 | 0.3 | 1 | 32  | 64  | 0.479 |
| EMA | 1   | 2x2 | 0.3 | 1 | 36  | 72  | 0.586 |
| EMA | 1   | 2x2 | 0.3 | 1 | 40  | 80  | 0.666 |
| EMA | 1   | 2x2 | 0.3 | 1 | 44  | 88  | 0.704 |
| EMA | 1   | 2x2 | 0.3 | 1 | 60  | 120 | 0.876 |
| EMA | 1   | 2x2 | 0.3 | 1 | 72  | 144 | 0.931 |
| EMA | 1   | 2x2 | 0.3 | 1 | 80  | 160 | 0.959 |

|     |   |     |     |   |     |     |       |
|-----|---|-----|-----|---|-----|-----|-------|
| EMA | 1 | 2x2 | 0.3 | 1 | 88  | 176 | 0.982 |
| EMA | 1 | 2x2 | 0.3 | 1 | 100 | 200 | 0.988 |
| EMA | 1 | 2x2 | 0.3 | 1 | 108 | 216 | 0.997 |
| EMA | 1 | 2x2 | 0.3 | 1 | 120 | 240 | 1     |
| EMA | 1 | 2x2 | 0.3 | 1 | 132 | 264 | 0.999 |
| EMA | 1 | 2x2 | 0.3 | 1 | 144 | 288 | 0.998 |
| EMA | 1 | 2x2 | 0.3 | 1 | 160 | 320 | 1     |
| EMA | 1 | 3x3 | 0.3 | 1 | 9   | 27  | 0.046 |
| EMA | 1 | 3x3 | 0.3 | 1 | 12  | 36  | 0.132 |
| EMA | 1 | 3x3 | 0.3 | 1 | 15  | 45  | 0.233 |
| EMA | 1 | 3x3 | 0.3 | 1 | 18  | 54  | 0.371 |
| EMA | 1 | 3x3 | 0.3 | 1 | 21  | 63  | 0.475 |
| EMA | 1 | 3x3 | 0.3 | 1 | 24  | 72  | 0.569 |
| EMA | 1 | 3x3 | 0.3 | 1 | 27  | 81  | 0.667 |
| EMA | 1 | 3x3 | 0.3 | 1 | 30  | 90  | 0.724 |
| EMA | 1 | 3x3 | 0.3 | 1 | 39  | 117 | 0.828 |
| EMA | 1 | 3x3 | 0.3 | 1 | 48  | 144 | 0.937 |
| EMA | 1 | 3x3 | 0.3 | 1 | 54  | 162 | 0.949 |
| EMA | 1 | 3x3 | 0.3 | 1 | 60  | 180 | 0.974 |
| EMA | 1 | 3x3 | 0.3 | 1 | 66  | 198 | 0.986 |
| EMA | 1 | 3x3 | 0.3 | 1 | 75  | 225 | 0.996 |
| EMA | 1 | 3x3 | 0.3 | 1 | 81  | 243 | 0.995 |
| EMA | 1 | 3x3 | 0.3 | 1 | 90  | 270 | 0.997 |
| EMA | 1 | 3x3 | 0.3 | 1 | 96  | 288 | 0.999 |
| EMA | 1 | 3x3 | 0.3 | 1 | 105 | 315 | 0.998 |
| EMA | 1 | 2x4 | 0.3 | 1 | 6   | 24  | 0.035 |
| EMA | 1 | 2x4 | 0.3 | 1 | 8   | 32  | 0.11  |
| EMA | 1 | 2x4 | 0.3 | 1 | 12  | 48  | 0.305 |
| EMA | 1 | 2x4 | 0.3 | 1 | 14  | 56  | 0.446 |
| EMA | 1 | 2x4 | 0.3 | 1 | 16  | 64  | 0.522 |
| EMA | 1 | 2x4 | 0.3 | 1 | 18  | 72  | 0.619 |
| EMA | 1 | 2x4 | 0.3 | 1 | 20  | 80  | 0.663 |
| EMA | 1 | 2x4 | 0.3 | 1 | 22  | 88  | 0.73  |
| EMA | 1 | 2x4 | 0.3 | 1 | 30  | 120 | 0.858 |
| EMA | 1 | 2x4 | 0.3 | 1 | 36  | 144 | 0.91  |
| EMA | 1 | 2x4 | 0.3 | 1 | 40  | 160 | 0.952 |
| EMA | 1 | 2x4 | 0.3 | 1 | 44  | 176 | 0.974 |
| EMA | 1 | 2x4 | 0.3 | 1 | 50  | 200 | 0.983 |
| EMA | 1 | 2x4 | 0.3 | 1 | 54  | 216 | 0.992 |
| EMA | 1 | 2x4 | 0.3 | 1 | 60  | 240 | 0.995 |
| EMA | 1 | 2x4 | 0.3 | 1 | 66  | 264 | 1     |

|     |     |     |     |   |     |     |       |
|-----|-----|-----|-----|---|-----|-----|-------|
| EMA | 1   | 2x4 | 0.3 | 1 | 72  | 288 | 1     |
| EMA | 1   | 2x4 | 0.3 | 1 | 80  | 320 | 0.999 |
| FDA | 0.7 | 2x2 | 0.3 | 1 | 12  | 24  | 0.015 |
| FDA | 0.7 | 2x2 | 0.3 | 1 | 16  | 32  | 0.034 |
| FDA | 0.7 | 2x2 | 0.3 | 1 | 24  | 48  | 0.2   |
| FDA | 0.7 | 2x2 | 0.3 | 1 | 28  | 56  | 0.305 |
| FDA | 0.7 | 2x2 | 0.3 | 1 | 32  | 64  | 0.419 |
| FDA | 0.7 | 2x2 | 0.3 | 1 | 36  | 72  | 0.506 |
| FDA | 0.7 | 2x2 | 0.3 | 1 | 40  | 80  | 0.591 |
| FDA | 0.7 | 2x2 | 0.3 | 1 | 44  | 88  | 0.631 |
| FDA | 0.7 | 2x2 | 0.3 | 1 | 60  | 120 | 0.819 |
| FDA | 0.7 | 2x2 | 0.3 | 1 | 72  | 144 | 0.913 |
| FDA | 0.7 | 2x2 | 0.3 | 1 | 80  | 160 | 0.938 |
| FDA | 0.7 | 2x2 | 0.3 | 1 | 88  | 176 | 0.973 |
| FDA | 0.7 | 2x2 | 0.3 | 1 | 100 | 200 | 0.985 |
| FDA | 0.7 | 2x2 | 0.3 | 1 | 108 | 216 | 0.989 |
| FDA | 0.7 | 2x2 | 0.3 | 1 | 120 | 240 | 0.994 |
| FDA | 0.7 | 2x2 | 0.3 | 1 | 132 | 264 | 0.999 |
| FDA | 0.7 | 2x2 | 0.3 | 1 | 144 | 288 | 0.999 |
| FDA | 0.7 | 2x2 | 0.3 | 1 | 160 | 320 | 0.999 |
| FDA | 0.7 | 3x3 | 0.3 | 1 | 9   | 27  | 0.065 |
| FDA | 0.7 | 3x3 | 0.3 | 1 | 12  | 36  | 0.126 |
| FDA | 0.7 | 3x3 | 0.3 | 1 | 15  | 45  | 0.256 |
| FDA | 0.7 | 3x3 | 0.3 | 1 | 18  | 54  | 0.362 |
| FDA | 0.7 | 3x3 | 0.3 | 1 | 21  | 63  | 0.469 |
| FDA | 0.7 | 3x3 | 0.3 | 1 | 24  | 72  | 0.555 |
| FDA | 0.7 | 3x3 | 0.3 | 1 | 27  | 81  | 0.662 |
| FDA | 0.7 | 3x3 | 0.3 | 1 | 30  | 90  | 0.73  |
| FDA | 0.7 | 3x3 | 0.3 | 1 | 39  | 117 | 0.82  |
| FDA | 0.7 | 3x3 | 0.3 | 1 | 48  | 144 | 0.927 |
| FDA | 0.7 | 3x3 | 0.3 | 1 | 54  | 162 | 0.936 |
| FDA | 0.7 | 3x3 | 0.3 | 1 | 60  | 180 | 0.974 |
| FDA | 0.7 | 3x3 | 0.3 | 1 | 66  | 198 | 0.984 |
| FDA | 0.7 | 3x3 | 0.3 | 1 | 75  | 225 | 0.992 |
| FDA | 0.7 | 3x3 | 0.3 | 1 | 81  | 243 | 0.995 |
| FDA | 0.7 | 3x3 | 0.3 | 1 | 90  | 270 | 0.995 |
| FDA | 0.7 | 3x3 | 0.3 | 1 | 96  | 288 | 0.997 |
| FDA | 0.7 | 3x3 | 0.3 | 1 | 105 | 315 | 0.997 |
| FDA | 0.7 | 2x4 | 0.3 | 1 | 6   | 24  | 0.033 |
| FDA | 0.7 | 2x4 | 0.3 | 1 | 8   | 32  | 0.056 |
| FDA | 0.7 | 2x4 | 0.3 | 1 | 12  | 48  | 0.131 |

|     |     |     |     |   |     |     |       |
|-----|-----|-----|-----|---|-----|-----|-------|
| FDA | 0.7 | 2x4 | 0.3 | 1 | 14  | 56  | 0.214 |
| FDA | 0.7 | 2x4 | 0.3 | 1 | 16  | 64  | 0.289 |
| FDA | 0.7 | 2x4 | 0.3 | 1 | 18  | 72  | 0.365 |
| FDA | 0.7 | 2x4 | 0.3 | 1 | 20  | 80  | 0.433 |
| FDA | 0.7 | 2x4 | 0.3 | 1 | 22  | 88  | 0.528 |
| FDA | 0.7 | 2x4 | 0.3 | 1 | 30  | 120 | 0.735 |
| FDA | 0.7 | 2x4 | 0.3 | 1 | 36  | 144 | 0.841 |
| FDA | 0.7 | 2x4 | 0.3 | 1 | 40  | 160 | 0.876 |
| FDA | 0.7 | 2x4 | 0.3 | 1 | 44  | 176 | 0.922 |
| FDA | 0.7 | 2x4 | 0.3 | 1 | 50  | 200 | 0.936 |
| FDA | 0.7 | 2x4 | 0.3 | 1 | 54  | 216 | 0.96  |
| FDA | 0.7 | 2x4 | 0.3 | 1 | 60  | 240 | 0.977 |
| FDA | 0.7 | 2x4 | 0.3 | 1 | 66  | 264 | 0.991 |
| FDA | 0.7 | 2x4 | 0.3 | 1 | 72  | 288 | 0.992 |
| FDA | 0.7 | 2x4 | 0.3 | 1 | 80  | 320 | 0.993 |
| FDA | 0.8 | 2x2 | 0.3 | 1 | 12  | 24  | 0.018 |
| FDA | 0.8 | 2x2 | 0.3 | 1 | 16  | 32  | 0.044 |
| FDA | 0.8 | 2x2 | 0.3 | 1 | 24  | 48  | 0.228 |
| FDA | 0.8 | 2x2 | 0.3 | 1 | 28  | 56  | 0.338 |
| FDA | 0.8 | 2x2 | 0.3 | 1 | 32  | 64  | 0.445 |
| FDA | 0.8 | 2x2 | 0.3 | 1 | 36  | 72  | 0.53  |
| FDA | 0.8 | 2x2 | 0.3 | 1 | 40  | 80  | 0.61  |
| FDA | 0.8 | 2x2 | 0.3 | 1 | 44  | 88  | 0.662 |
| FDA | 0.8 | 2x2 | 0.3 | 1 | 60  | 120 | 0.834 |
| FDA | 0.8 | 2x2 | 0.3 | 1 | 72  | 144 | 0.921 |
| FDA | 0.8 | 2x2 | 0.3 | 1 | 80  | 160 | 0.948 |
| FDA | 0.8 | 2x2 | 0.3 | 1 | 88  | 176 | 0.978 |
| FDA | 0.8 | 2x2 | 0.3 | 1 | 100 | 200 | 0.987 |
| FDA | 0.8 | 2x2 | 0.3 | 1 | 108 | 216 | 0.992 |
| FDA | 0.8 | 2x2 | 0.3 | 1 | 120 | 240 | 0.995 |
| FDA | 0.8 | 2x2 | 0.3 | 1 | 132 | 264 | 0.999 |
| FDA | 0.8 | 2x2 | 0.3 | 1 | 144 | 288 | 0.999 |
| FDA | 0.8 | 2x2 | 0.3 | 1 | 160 | 320 | 0.999 |
| FDA | 0.8 | 3x3 | 0.3 | 1 | 9   | 27  | 0.07  |
| FDA | 0.8 | 3x3 | 0.3 | 1 | 12  | 36  | 0.145 |
| FDA | 0.8 | 3x3 | 0.3 | 1 | 15  | 45  | 0.276 |
| FDA | 0.8 | 3x3 | 0.3 | 1 | 18  | 54  | 0.389 |
| FDA | 0.8 | 3x3 | 0.3 | 1 | 21  | 63  | 0.494 |
| FDA | 0.8 | 3x3 | 0.3 | 1 | 24  | 72  | 0.579 |
| FDA | 0.8 | 3x3 | 0.3 | 1 | 27  | 81  | 0.677 |
| FDA | 0.8 | 3x3 | 0.3 | 1 | 30  | 90  | 0.749 |

|     |     |     |     |   |     |     |       |
|-----|-----|-----|-----|---|-----|-----|-------|
| FDA | 0.8 | 3x3 | 0.3 | 1 | 39  | 117 | 0.832 |
| FDA | 0.8 | 3x3 | 0.3 | 1 | 48  | 144 | 0.937 |
| FDA | 0.8 | 3x3 | 0.3 | 1 | 54  | 162 | 0.943 |
| FDA | 0.8 | 3x3 | 0.3 | 1 | 60  | 180 | 0.977 |
| FDA | 0.8 | 3x3 | 0.3 | 1 | 66  | 198 | 0.985 |
| FDA | 0.8 | 3x3 | 0.3 | 1 | 75  | 225 | 0.992 |
| FDA | 0.8 | 3x3 | 0.3 | 1 | 81  | 243 | 0.995 |
| FDA | 0.8 | 3x3 | 0.3 | 1 | 90  | 270 | 0.995 |
| FDA | 0.8 | 3x3 | 0.3 | 1 | 96  | 288 | 0.999 |
| FDA | 0.8 | 3x3 | 0.3 | 1 | 105 | 315 | 0.998 |
| FDA | 0.8 | 2x4 | 0.3 | 1 | 6   | 24  | 0.041 |
| FDA | 0.8 | 2x4 | 0.3 | 1 | 8   | 32  | 0.058 |
| FDA | 0.8 | 2x4 | 0.3 | 1 | 12  | 48  | 0.15  |
| FDA | 0.8 | 2x4 | 0.3 | 1 | 14  | 56  | 0.234 |
| FDA | 0.8 | 2x4 | 0.3 | 1 | 16  | 64  | 0.308 |
| FDA | 0.8 | 2x4 | 0.3 | 1 | 18  | 72  | 0.399 |
| FDA | 0.8 | 2x4 | 0.3 | 1 | 20  | 80  | 0.471 |
| FDA | 0.8 | 2x4 | 0.3 | 1 | 22  | 88  | 0.557 |
| FDA | 0.8 | 2x4 | 0.3 | 1 | 30  | 120 | 0.764 |
| FDA | 0.8 | 2x4 | 0.3 | 1 | 36  | 144 | 0.855 |
| FDA | 0.8 | 2x4 | 0.3 | 1 | 40  | 160 | 0.89  |
| FDA | 0.8 | 2x4 | 0.3 | 1 | 44  | 176 | 0.93  |
| FDA | 0.8 | 2x4 | 0.3 | 1 | 50  | 200 | 0.949 |
| FDA | 0.8 | 2x4 | 0.3 | 1 | 54  | 216 | 0.965 |
| FDA | 0.8 | 2x4 | 0.3 | 1 | 60  | 240 | 0.982 |
| FDA | 0.8 | 2x4 | 0.3 | 1 | 66  | 264 | 0.992 |
| FDA | 0.8 | 2x4 | 0.3 | 1 | 72  | 288 | 0.993 |
| FDA | 0.8 | 2x4 | 0.3 | 1 | 80  | 320 | 0.996 |
| FDA | 1   | 2x2 | 0.3 | 1 | 12  | 24  | 0.034 |
| FDA | 1   | 2x2 | 0.3 | 1 | 16  | 32  | 0.068 |
| FDA | 1   | 2x2 | 0.3 | 1 | 24  | 48  | 0.268 |
| FDA | 1   | 2x2 | 0.3 | 1 | 28  | 56  | 0.393 |
| FDA | 1   | 2x2 | 0.3 | 1 | 32  | 64  | 0.479 |
| FDA | 1   | 2x2 | 0.3 | 1 | 36  | 72  | 0.586 |
| FDA | 1   | 2x2 | 0.3 | 1 | 40  | 80  | 0.666 |
| FDA | 1   | 2x2 | 0.3 | 1 | 44  | 88  | 0.704 |
| FDA | 1   | 2x2 | 0.3 | 1 | 60  | 120 | 0.876 |
| FDA | 1   | 2x2 | 0.3 | 1 | 72  | 144 | 0.931 |
| FDA | 1   | 2x2 | 0.3 | 1 | 80  | 160 | 0.959 |
| FDA | 1   | 2x2 | 0.3 | 1 | 88  | 176 | 0.982 |
| FDA | 1   | 2x2 | 0.3 | 1 | 100 | 200 | 0.988 |

|     |   |     |     |   |     |     |       |
|-----|---|-----|-----|---|-----|-----|-------|
| FDA | 1 | 2x2 | 0.3 | 1 | 108 | 216 | 0.997 |
| FDA | 1 | 2x2 | 0.3 | 1 | 120 | 240 | 1     |
| FDA | 1 | 2x2 | 0.3 | 1 | 132 | 264 | 0.999 |
| FDA | 1 | 2x2 | 0.3 | 1 | 144 | 288 | 0.998 |
| FDA | 1 | 2x2 | 0.3 | 1 | 160 | 320 | 1     |
| FDA | 1 | 3x3 | 0.3 | 1 | 9   | 27  | 0.1   |
| FDA | 1 | 3x3 | 0.3 | 1 | 12  | 36  | 0.186 |
| FDA | 1 | 3x3 | 0.3 | 1 | 15  | 45  | 0.327 |
| FDA | 1 | 3x3 | 0.3 | 1 | 18  | 54  | 0.441 |
| FDA | 1 | 3x3 | 0.3 | 1 | 21  | 63  | 0.54  |
| FDA | 1 | 3x3 | 0.3 | 1 | 24  | 72  | 0.63  |
| FDA | 1 | 3x3 | 0.3 | 1 | 27  | 81  | 0.733 |
| FDA | 1 | 3x3 | 0.3 | 1 | 30  | 90  | 0.784 |
| FDA | 1 | 3x3 | 0.3 | 1 | 39  | 117 | 0.878 |
| FDA | 1 | 3x3 | 0.3 | 1 | 48  | 144 | 0.954 |
| FDA | 1 | 3x3 | 0.3 | 1 | 54  | 162 | 0.96  |
| FDA | 1 | 3x3 | 0.3 | 1 | 60  | 180 | 0.984 |
| FDA | 1 | 3x3 | 0.3 | 1 | 66  | 198 | 0.989 |
| FDA | 1 | 3x3 | 0.3 | 1 | 75  | 225 | 0.997 |
| FDA | 1 | 3x3 | 0.3 | 1 | 81  | 243 | 0.997 |
| FDA | 1 | 3x3 | 0.3 | 1 | 90  | 270 | 0.999 |
| FDA | 1 | 3x3 | 0.3 | 1 | 96  | 288 | 0.999 |
| FDA | 1 | 3x3 | 0.3 | 1 | 105 | 315 | 0.999 |
| FDA | 1 | 2x4 | 0.3 | 1 | 6   | 24  | 0.04  |
| FDA | 1 | 2x4 | 0.3 | 1 | 8   | 32  | 0.082 |
| FDA | 1 | 2x4 | 0.3 | 1 | 12  | 48  | 0.204 |
| FDA | 1 | 2x4 | 0.3 | 1 | 14  | 56  | 0.297 |
| FDA | 1 | 2x4 | 0.3 | 1 | 16  | 64  | 0.388 |
| FDA | 1 | 2x4 | 0.3 | 1 | 18  | 72  | 0.475 |
| FDA | 1 | 2x4 | 0.3 | 1 | 20  | 80  | 0.557 |
| FDA | 1 | 2x4 | 0.3 | 1 | 22  | 88  | 0.635 |
| FDA | 1 | 2x4 | 0.3 | 1 | 30  | 120 | 0.812 |
| FDA | 1 | 2x4 | 0.3 | 1 | 36  | 144 | 0.895 |
| FDA | 1 | 2x4 | 0.3 | 1 | 40  | 160 | 0.926 |
| FDA | 1 | 2x4 | 0.3 | 1 | 44  | 176 | 0.945 |
| FDA | 1 | 2x4 | 0.3 | 1 | 50  | 200 | 0.97  |
| FDA | 1 | 2x4 | 0.3 | 1 | 54  | 216 | 0.979 |
| FDA | 1 | 2x4 | 0.3 | 1 | 60  | 240 | 0.987 |
| FDA | 1 | 2x4 | 0.3 | 1 | 66  | 264 | 0.995 |
| FDA | 1 | 2x4 | 0.3 | 1 | 72  | 288 | 0.997 |
| FDA | 1 | 2x4 | 0.3 | 1 | 80  | 320 | 0.998 |



**Table A5.** Comparison of power among clinical trial designs by typical value of Ka: The simulation results are summarized in Figure 5.

| Agency | ka   | Design | CV  | GMR | Total number of subject | Total number of hospitalization (N) | Power |
|--------|------|--------|-----|-----|-------------------------|-------------------------------------|-------|
| EMA    | 1.34 | 2x2    | 0.3 | 1   | 12                      | 24                                  | 0.018 |
| EMA    | 1.34 | 2x2    | 0.3 | 1   | 16                      | 32                                  | 0.044 |
| EMA    | 1.34 | 2x2    | 0.3 | 1   | 24                      | 48                                  | 0.228 |
| EMA    | 1.34 | 2x2    | 0.3 | 1   | 28                      | 56                                  | 0.338 |
| EMA    | 1.34 | 2x2    | 0.3 | 1   | 32                      | 64                                  | 0.445 |
| EMA    | 1.34 | 2x2    | 0.3 | 1   | 36                      | 72                                  | 0.53  |
| EMA    | 1.34 | 2x2    | 0.3 | 1   | 40                      | 80                                  | 0.61  |
| EMA    | 1.34 | 2x2    | 0.3 | 1   | 44                      | 88                                  | 0.662 |
| EMA    | 1.34 | 2x2    | 0.3 | 1   | 60                      | 120                                 | 0.834 |
| EMA    | 1.34 | 2x2    | 0.3 | 1   | 72                      | 144                                 | 0.921 |
| EMA    | 1.34 | 2x2    | 0.3 | 1   | 80                      | 160                                 | 0.948 |
| EMA    | 1.34 | 2x2    | 0.3 | 1   | 88                      | 176                                 | 0.978 |
| EMA    | 1.34 | 2x2    | 0.3 | 1   | 100                     | 200                                 | 0.987 |
| EMA    | 1.34 | 2x2    | 0.3 | 1   | 108                     | 216                                 | 0.992 |
| EMA    | 1.34 | 2x2    | 0.3 | 1   | 120                     | 240                                 | 0.995 |
| EMA    | 1.34 | 2x2    | 0.3 | 1   | 132                     | 264                                 | 0.999 |
| EMA    | 1.34 | 2x2    | 0.3 | 1   | 144                     | 288                                 | 0.999 |
| EMA    | 1.34 | 2x2    | 0.3 | 1   | 160                     | 320                                 | 0.999 |
| EMA    | 1.34 | 3x3    | 0.3 | 1   | 9                       | 27                                  | 0.018 |
| EMA    | 1.34 | 3x3    | 0.3 | 1   | 12                      | 36                                  | 0.089 |
| EMA    | 1.34 | 3x3    | 0.3 | 1   | 15                      | 45                                  | 0.206 |
| EMA    | 1.34 | 3x3    | 0.3 | 1   | 18                      | 54                                  | 0.321 |
| EMA    | 1.34 | 3x3    | 0.3 | 1   | 21                      | 63                                  | 0.43  |
| EMA    | 1.34 | 3x3    | 0.3 | 1   | 24                      | 72                                  | 0.507 |
| EMA    | 1.34 | 3x3    | 0.3 | 1   | 27                      | 81                                  | 0.628 |
| EMA    | 1.34 | 3x3    | 0.3 | 1   | 30                      | 90                                  | 0.689 |
| EMA    | 1.34 | 3x3    | 0.3 | 1   | 39                      | 117                                 | 0.785 |
| EMA    | 1.34 | 3x3    | 0.3 | 1   | 48                      | 144                                 | 0.912 |
| EMA    | 1.34 | 3x3    | 0.3 | 1   | 54                      | 162                                 | 0.926 |
| EMA    | 1.34 | 3x3    | 0.3 | 1   | 60                      | 180                                 | 0.966 |
| EMA    | 1.34 | 3x3    | 0.3 | 1   | 66                      | 198                                 | 0.977 |
| EMA    | 1.34 | 3x3    | 0.3 | 1   | 75                      | 225                                 | 0.989 |
| EMA    | 1.34 | 3x3    | 0.3 | 1   | 81                      | 243                                 | 0.994 |
| EMA    | 1.34 | 3x3    | 0.3 | 1   | 90                      | 270                                 | 0.995 |
| EMA    | 1.34 | 3x3    | 0.3 | 1   | 96                      | 288                                 | 0.998 |
| EMA    | 1.34 | 3x3    | 0.3 | 1   | 105                     | 315                                 | 0.997 |
| EMA    | 1.34 | 2x4    | 0.3 | 1   | 6                       | 24                                  | 0.024 |

|     |      |     |     |   |     |     |       |
|-----|------|-----|-----|---|-----|-----|-------|
| EMA | 1.34 | 2x4 | 0.3 | 1 | 8   | 32  | 0.081 |
| EMA | 1.34 | 2x4 | 0.3 | 1 | 12  | 48  | 0.263 |
| EMA | 1.34 | 2x4 | 0.3 | 1 | 14  | 56  | 0.402 |
| EMA | 1.34 | 2x4 | 0.3 | 1 | 16  | 64  | 0.473 |
| EMA | 1.34 | 2x4 | 0.3 | 1 | 18  | 72  | 0.554 |
| EMA | 1.34 | 2x4 | 0.3 | 1 | 20  | 80  | 0.64  |
| EMA | 1.34 | 2x4 | 0.3 | 1 | 22  | 88  | 0.684 |
| EMA | 1.34 | 2x4 | 0.3 | 1 | 30  | 120 | 0.833 |
| EMA | 1.34 | 2x4 | 0.3 | 1 | 36  | 144 | 0.902 |
| EMA | 1.34 | 2x4 | 0.3 | 1 | 40  | 160 | 0.939 |
| EMA | 1.34 | 2x4 | 0.3 | 1 | 44  | 176 | 0.964 |
| EMA | 1.34 | 2x4 | 0.3 | 1 | 50  | 200 | 0.977 |
| EMA | 1.34 | 2x4 | 0.3 | 1 | 54  | 216 | 0.988 |
| EMA | 1.34 | 2x4 | 0.3 | 1 | 60  | 240 | 0.987 |
| EMA | 1.34 | 2x4 | 0.3 | 1 | 66  | 264 | 0.999 |
| EMA | 1.34 | 2x4 | 0.3 | 1 | 72  | 288 | 0.998 |
| EMA | 1.34 | 2x4 | 0.3 | 1 | 80  | 320 | 0.999 |
| EMA | 1.38 | 2x2 | 0.3 | 1 | 12  | 24  | 0.023 |
| EMA | 1.38 | 2x2 | 0.3 | 1 | 16  | 32  | 0.044 |
| EMA | 1.38 | 2x2 | 0.3 | 1 | 24  | 48  | 0.206 |
| EMA | 1.38 | 2x2 | 0.3 | 1 | 28  | 56  | 0.32  |
| EMA | 1.38 | 2x2 | 0.3 | 1 | 32  | 64  | 0.419 |
| EMA | 1.38 | 2x2 | 0.3 | 1 | 36  | 72  | 0.5   |
| EMA | 1.38 | 2x2 | 0.3 | 1 | 40  | 80  | 0.587 |
| EMA | 1.38 | 2x2 | 0.3 | 1 | 44  | 88  | 0.623 |
| EMA | 1.38 | 2x2 | 0.3 | 1 | 60  | 120 | 0.816 |
| EMA | 1.38 | 2x2 | 0.3 | 1 | 72  | 144 | 0.905 |
| EMA | 1.38 | 2x2 | 0.3 | 1 | 80  | 160 | 0.937 |
| EMA | 1.38 | 2x2 | 0.3 | 1 | 88  | 176 | 0.967 |
| EMA | 1.38 | 2x2 | 0.3 | 1 | 100 | 200 | 0.98  |
| EMA | 1.38 | 2x2 | 0.3 | 1 | 108 | 216 | 0.984 |
| EMA | 1.38 | 2x2 | 0.3 | 1 | 120 | 240 | 0.991 |
| EMA | 1.38 | 2x2 | 0.3 | 1 | 132 | 264 | 0.997 |
| EMA | 1.38 | 2x2 | 0.3 | 1 | 144 | 288 | 0.996 |
| EMA | 1.38 | 2x2 | 0.3 | 1 | 160 | 320 | 0.998 |
| EMA | 1.38 | 3x3 | 0.3 | 1 | 9   | 27  | 0.018 |
| EMA | 1.38 | 3x3 | 0.3 | 1 | 12  | 36  | 0.084 |
| EMA | 1.38 | 3x3 | 0.3 | 1 | 15  | 45  | 0.2   |
| EMA | 1.38 | 3x3 | 0.3 | 1 | 18  | 54  | 0.293 |
| EMA | 1.38 | 3x3 | 0.3 | 1 | 21  | 63  | 0.418 |
| EMA | 1.38 | 3x3 | 0.3 | 1 | 24  | 72  | 0.48  |

|     |      |     |     |   |     |     |       |
|-----|------|-----|-----|---|-----|-----|-------|
| EMA | 1.38 | 3x3 | 0.3 | 1 | 27  | 81  | 0.604 |
| EMA | 1.38 | 3x3 | 0.3 | 1 | 30  | 90  | 0.661 |
| EMA | 1.38 | 3x3 | 0.3 | 1 | 39  | 117 | 0.772 |
| EMA | 1.38 | 3x3 | 0.3 | 1 | 48  | 144 | 0.897 |
| EMA | 1.38 | 3x3 | 0.3 | 1 | 54  | 162 | 0.904 |
| EMA | 1.38 | 3x3 | 0.3 | 1 | 60  | 180 | 0.953 |
| EMA | 1.38 | 3x3 | 0.3 | 1 | 66  | 198 | 0.966 |
| EMA | 1.38 | 3x3 | 0.3 | 1 | 75  | 225 | 0.982 |
| EMA | 1.38 | 3x3 | 0.3 | 1 | 81  | 243 | 0.989 |
| EMA | 1.38 | 3x3 | 0.3 | 1 | 90  | 270 | 0.989 |
| EMA | 1.38 | 3x3 | 0.3 | 1 | 96  | 288 | 0.992 |
| EMA | 1.38 | 3x3 | 0.3 | 1 | 105 | 315 | 0.991 |
| EMA | 1.38 | 2x4 | 0.3 | 1 | 6   | 24  | 0.023 |
| EMA | 1.38 | 2x4 | 0.3 | 1 | 8   | 32  | 0.078 |
| EMA | 1.38 | 2x4 | 0.3 | 1 | 12  | 48  | 0.247 |
| EMA | 1.38 | 2x4 | 0.3 | 1 | 14  | 56  | 0.394 |
| EMA | 1.38 | 2x4 | 0.3 | 1 | 16  | 64  | 0.456 |
| EMA | 1.38 | 2x4 | 0.3 | 1 | 18  | 72  | 0.546 |
| EMA | 1.38 | 2x4 | 0.3 | 1 | 20  | 80  | 0.613 |
| EMA | 1.38 | 2x4 | 0.3 | 1 | 22  | 88  | 0.663 |
| EMA | 1.38 | 2x4 | 0.3 | 1 | 30  | 120 | 0.823 |
| EMA | 1.38 | 2x4 | 0.3 | 1 | 36  | 144 | 0.892 |
| EMA | 1.38 | 2x4 | 0.3 | 1 | 40  | 160 | 0.929 |
| EMA | 1.38 | 2x4 | 0.3 | 1 | 44  | 176 | 0.951 |
| EMA | 1.38 | 2x4 | 0.3 | 1 | 50  | 200 | 0.967 |
| EMA | 1.38 | 2x4 | 0.3 | 1 | 54  | 216 | 0.98  |
| EMA | 1.38 | 2x4 | 0.3 | 1 | 60  | 240 | 0.981 |
| EMA | 1.38 | 2x4 | 0.3 | 1 | 66  | 264 | 0.996 |
| EMA | 1.38 | 2x4 | 0.3 | 1 | 72  | 288 | 0.995 |
| EMA | 1.38 | 2x4 | 0.3 | 1 | 80  | 320 | 0.997 |
| FDA | 1.34 | 2x2 | 0.3 | 1 | 12  | 24  | 0.018 |
| FDA | 1.34 | 2x2 | 0.3 | 1 | 16  | 32  | 0.044 |
| FDA | 1.34 | 2x2 | 0.3 | 1 | 24  | 48  | 0.228 |
| FDA | 1.34 | 2x2 | 0.3 | 1 | 28  | 56  | 0.338 |
| FDA | 1.34 | 2x2 | 0.3 | 1 | 32  | 64  | 0.445 |
| FDA | 1.34 | 2x2 | 0.3 | 1 | 36  | 72  | 0.53  |
| FDA | 1.34 | 2x2 | 0.3 | 1 | 40  | 80  | 0.61  |
| FDA | 1.34 | 2x2 | 0.3 | 1 | 44  | 88  | 0.662 |
| FDA | 1.34 | 2x2 | 0.3 | 1 | 60  | 120 | 0.834 |
| FDA | 1.34 | 2x2 | 0.3 | 1 | 72  | 144 | 0.921 |
| FDA | 1.34 | 2x2 | 0.3 | 1 | 80  | 160 | 0.948 |

|     |      |     |     |   |     |     |       |
|-----|------|-----|-----|---|-----|-----|-------|
| FDA | 1.34 | 2x2 | 0.3 | 1 | 88  | 176 | 0.978 |
| FDA | 1.34 | 2x2 | 0.3 | 1 | 100 | 200 | 0.987 |
| FDA | 1.34 | 2x2 | 0.3 | 1 | 108 | 216 | 0.992 |
| FDA | 1.34 | 2x2 | 0.3 | 1 | 120 | 240 | 0.995 |
| FDA | 1.34 | 2x2 | 0.3 | 1 | 132 | 264 | 0.999 |
| FDA | 1.34 | 2x2 | 0.3 | 1 | 144 | 288 | 0.999 |
| FDA | 1.34 | 2x2 | 0.3 | 1 | 160 | 320 | 0.999 |
| FDA | 1.34 | 3x3 | 0.3 | 1 | 9   | 27  | 0.07  |
| FDA | 1.34 | 3x3 | 0.3 | 1 | 12  | 36  | 0.145 |
| FDA | 1.34 | 3x3 | 0.3 | 1 | 15  | 45  | 0.276 |
| FDA | 1.34 | 3x3 | 0.3 | 1 | 18  | 54  | 0.389 |
| FDA | 1.34 | 3x3 | 0.3 | 1 | 21  | 63  | 0.494 |
| FDA | 1.34 | 3x3 | 0.3 | 1 | 24  | 72  | 0.579 |
| FDA | 1.34 | 3x3 | 0.3 | 1 | 27  | 81  | 0.677 |
| FDA | 1.34 | 3x3 | 0.3 | 1 | 30  | 90  | 0.749 |
| FDA | 1.34 | 3x3 | 0.3 | 1 | 39  | 117 | 0.832 |
| FDA | 1.34 | 3x3 | 0.3 | 1 | 48  | 144 | 0.937 |
| FDA | 1.34 | 3x3 | 0.3 | 1 | 54  | 162 | 0.943 |
| FDA | 1.34 | 3x3 | 0.3 | 1 | 60  | 180 | 0.977 |
| FDA | 1.34 | 3x3 | 0.3 | 1 | 66  | 198 | 0.985 |
| FDA | 1.34 | 3x3 | 0.3 | 1 | 75  | 225 | 0.992 |
| FDA | 1.34 | 3x3 | 0.3 | 1 | 81  | 243 | 0.995 |
| FDA | 1.34 | 3x3 | 0.3 | 1 | 90  | 270 | 0.995 |
| FDA | 1.34 | 3x3 | 0.3 | 1 | 96  | 288 | 0.999 |
| FDA | 1.34 | 3x3 | 0.3 | 1 | 105 | 315 | 0.998 |
| FDA | 1.34 | 2x4 | 0.3 | 1 | 6   | 24  | 0.041 |
| FDA | 1.34 | 2x4 | 0.3 | 1 | 8   | 32  | 0.058 |
| FDA | 1.34 | 2x4 | 0.3 | 1 | 12  | 48  | 0.15  |
| FDA | 1.34 | 2x4 | 0.3 | 1 | 14  | 56  | 0.234 |
| FDA | 1.34 | 2x4 | 0.3 | 1 | 16  | 64  | 0.308 |
| FDA | 1.34 | 2x4 | 0.3 | 1 | 18  | 72  | 0.399 |
| FDA | 1.34 | 2x4 | 0.3 | 1 | 20  | 80  | 0.471 |
| FDA | 1.34 | 2x4 | 0.3 | 1 | 22  | 88  | 0.557 |
| FDA | 1.34 | 2x4 | 0.3 | 1 | 30  | 120 | 0.764 |
| FDA | 1.34 | 2x4 | 0.3 | 1 | 36  | 144 | 0.855 |
| FDA | 1.34 | 2x4 | 0.3 | 1 | 40  | 160 | 0.89  |
| FDA | 1.34 | 2x4 | 0.3 | 1 | 44  | 176 | 0.93  |
| FDA | 1.34 | 2x4 | 0.3 | 1 | 50  | 200 | 0.949 |
| FDA | 1.34 | 2x4 | 0.3 | 1 | 54  | 216 | 0.965 |
| FDA | 1.34 | 2x4 | 0.3 | 1 | 60  | 240 | 0.982 |
| FDA | 1.34 | 2x4 | 0.3 | 1 | 66  | 264 | 0.992 |

|     |      |     |     |   |     |     |       |
|-----|------|-----|-----|---|-----|-----|-------|
| FDA | 1.34 | 2x4 | 0.3 | 1 | 72  | 288 | 0.993 |
| FDA | 1.34 | 2x4 | 0.3 | 1 | 80  | 320 | 0.996 |
| FDA | 1.38 | 2x2 | 0.3 | 1 | 12  | 24  | 0.023 |
| FDA | 1.38 | 2x2 | 0.3 | 1 | 16  | 32  | 0.044 |
| FDA | 1.38 | 2x2 | 0.3 | 1 | 24  | 48  | 0.206 |
| FDA | 1.38 | 2x2 | 0.3 | 1 | 28  | 56  | 0.32  |
| FDA | 1.38 | 2x2 | 0.3 | 1 | 32  | 64  | 0.419 |
| FDA | 1.38 | 2x2 | 0.3 | 1 | 36  | 72  | 0.5   |
| FDA | 1.38 | 2x2 | 0.3 | 1 | 40  | 80  | 0.587 |
| FDA | 1.38 | 2x2 | 0.3 | 1 | 44  | 88  | 0.623 |
| FDA | 1.38 | 2x2 | 0.3 | 1 | 60  | 120 | 0.816 |
| FDA | 1.38 | 2x2 | 0.3 | 1 | 72  | 144 | 0.905 |
| FDA | 1.38 | 2x2 | 0.3 | 1 | 80  | 160 | 0.937 |
| FDA | 1.38 | 2x2 | 0.3 | 1 | 88  | 176 | 0.967 |
| FDA | 1.38 | 2x2 | 0.3 | 1 | 100 | 200 | 0.98  |
| FDA | 1.38 | 2x2 | 0.3 | 1 | 108 | 216 | 0.984 |
| FDA | 1.38 | 2x2 | 0.3 | 1 | 120 | 240 | 0.991 |
| FDA | 1.38 | 2x2 | 0.3 | 1 | 132 | 264 | 0.997 |
| FDA | 1.38 | 2x2 | 0.3 | 1 | 144 | 288 | 0.996 |
| FDA | 1.38 | 2x2 | 0.3 | 1 | 160 | 320 | 0.998 |
| FDA | 1.38 | 3x3 | 0.3 | 1 | 9   | 27  | 0.073 |
| FDA | 1.38 | 3x3 | 0.3 | 1 | 12  | 36  | 0.142 |
| FDA | 1.38 | 3x3 | 0.3 | 1 | 15  | 45  | 0.27  |
| FDA | 1.38 | 3x3 | 0.3 | 1 | 18  | 54  | 0.365 |
| FDA | 1.38 | 3x3 | 0.3 | 1 | 21  | 63  | 0.483 |
| FDA | 1.38 | 3x3 | 0.3 | 1 | 24  | 72  | 0.545 |
| FDA | 1.38 | 3x3 | 0.3 | 1 | 27  | 81  | 0.663 |
| FDA | 1.38 | 3x3 | 0.3 | 1 | 30  | 90  | 0.723 |
| FDA | 1.38 | 3x3 | 0.3 | 1 | 39  | 117 | 0.813 |
| FDA | 1.38 | 3x3 | 0.3 | 1 | 48  | 144 | 0.921 |
| FDA | 1.38 | 3x3 | 0.3 | 1 | 54  | 162 | 0.929 |
| FDA | 1.38 | 3x3 | 0.3 | 1 | 60  | 180 | 0.962 |
| FDA | 1.38 | 3x3 | 0.3 | 1 | 66  | 198 | 0.977 |
| FDA | 1.38 | 3x3 | 0.3 | 1 | 75  | 225 | 0.989 |
| FDA | 1.38 | 3x3 | 0.3 | 1 | 81  | 243 | 0.992 |
| FDA | 1.38 | 3x3 | 0.3 | 1 | 90  | 270 | 0.993 |
| FDA | 1.38 | 3x3 | 0.3 | 1 | 96  | 288 | 0.996 |
| FDA | 1.38 | 3x3 | 0.3 | 1 | 105 | 315 | 0.993 |
| FDA | 1.38 | 2x4 | 0.3 | 1 | 6   | 24  | 0.039 |
| FDA | 1.38 | 2x4 | 0.3 | 1 | 8   | 32  | 0.058 |
| FDA | 1.38 | 2x4 | 0.3 | 1 | 12  | 48  | 0.137 |

|     |      |     |     |   |    |     |       |
|-----|------|-----|-----|---|----|-----|-------|
| FDA | 1.38 | 2x4 | 0.3 | 1 | 14 | 56  | 0.24  |
| FDA | 1.38 | 2x4 | 0.3 | 1 | 16 | 64  | 0.301 |
| FDA | 1.38 | 2x4 | 0.3 | 1 | 18 | 72  | 0.394 |
| FDA | 1.38 | 2x4 | 0.3 | 1 | 20 | 80  | 0.455 |
| FDA | 1.38 | 2x4 | 0.3 | 1 | 22 | 88  | 0.532 |
| FDA | 1.38 | 2x4 | 0.3 | 1 | 30 | 120 | 0.74  |
| FDA | 1.38 | 2x4 | 0.3 | 1 | 36 | 144 | 0.831 |
| FDA | 1.38 | 2x4 | 0.3 | 1 | 40 | 160 | 0.872 |
| FDA | 1.38 | 2x4 | 0.3 | 1 | 44 | 176 | 0.914 |
| FDA | 1.38 | 2x4 | 0.3 | 1 | 50 | 200 | 0.937 |
| FDA | 1.38 | 2x4 | 0.3 | 1 | 54 | 216 | 0.956 |
| FDA | 1.38 | 2x4 | 0.3 | 1 | 60 | 240 | 0.972 |
| FDA | 1.38 | 2x4 | 0.3 | 1 | 66 | 264 | 0.985 |
| FDA | 1.38 | 2x4 | 0.3 | 1 | 72 | 288 | 0.992 |
| FDA | 1.38 | 2x4 | 0.3 | 1 | 80 | 320 | 0.994 |
