# Supplementary material for: Model-Based Approach for Designing an Efficient Bioequivalence Study for Highly Variable Drugs
Source: MDPI journal article supplement (doi:10.3390/ph14111101), 2021-10-28
Supplement: s1 [file s1]

**Table S1.** Comparison between results of the proposed method and a previous study: The simulation results are summarized in Figure 2.

| Agency | Design | CV  | GMR | Total number of subject | Total number of hospitalization (N) | Power |
|--------|--------|-----|-----|-------------------------|-------------------------------------|-------|
| EMA    | 2x2    | 0.3 | 1   | 12                      | 24                                  | 0.185 |
| EMA    | 2x2    | 0.3 | 1   | 16                      | 32                                  | 0.382 |
| EMA    | 2x2    | 0.3 | 1   | 24                      | 48                                  | 0.667 |
| EMA    | 2x2    | 0.3 | 1   | 28                      | 56                                  | 0.763 |
| EMA    | 2x2    | 0.3 | 1   | 32                      | 64                                  | 0.848 |
| EMA    | 2x2    | 0.3 | 1   | 36                      | 72                                  | 0.908 |
| EMA    | 2x2    | 0.3 | 1   | 40                      | 80                                  | 0.929 |
| EMA    | 2x2    | 0.3 | 1   | 44                      | 88                                  | 0.94  |
| EMA    | 2x2    | 0.3 | 1   | 60                      | 120                                 | 0.992 |
| EMA    | 2x2    | 0.3 | 1   | 72                      | 144                                 | 0.996 |
| EMA    | 2x2    | 0.3 | 1   | 80                      | 160                                 | 1     |
| EMA    | 2x2    | 0.3 | 1   | 88                      | 176                                 | 0.999 |
| EMA    | 3x3    | 0.3 | 1   | 9                       | 27                                  | 0.117 |
| EMA    | 3x3    | 0.3 | 1   | 12                      | 36                                  | 0.267 |
| EMA    | 3x3    | 0.3 | 1   | 15                      | 45                                  | 0.458 |
| EMA    | 3x3    | 0.3 | 1   | 18                      | 54                                  | 0.58  |
| EMA    | 3x3    | 0.3 | 1   | 21                      | 63                                  | 0.72  |
| EMA    | 3x3    | 0.3 | 1   | 24                      | 72                                  | 0.786 |
| EMA    | 3x3    | 0.3 | 1   | 27                      | 81                                  | 0.85  |
| EMA    | 3x3    | 0.3 | 1   | 30                      | 90                                  | 0.89  |
| EMA    | 3x3    | 0.3 | 1   | 39                      | 117                                 | 0.961 |
| EMA    | 3x3    | 0.3 | 1   | 48                      | 144                                 | 0.985 |
| EMA    | 3x3    | 0.3 | 1   | 54                      | 162                                 | 0.994 |
| EMA    | 3x3    | 0.3 | 1   | 60                      | 180                                 | 1     |
| EMA    | 2x4    | 0.3 | 1   | 6                       | 24                                  | 0.108 |
| EMA    | 2x4    | 0.3 | 1   | 8                       | 32                                  | 0.258 |
| EMA    | 2x4    | 0.3 | 1   | 12                      | 48                                  | 0.585 |
| EMA    | 2x4    | 0.3 | 1   | 14                      | 56                                  | 0.717 |
| EMA    | 2x4    | 0.3 | 1   | 16                      | 64                                  | 0.806 |
| EMA    | 2x4    | 0.3 | 1   | 18                      | 72                                  | 0.856 |
| EMA    | 2x4    | 0.3 | 1   | 20                      | 80                                  | 0.9   |
| EMA    | 2x4    | 0.3 | 1   | 22                      | 88                                  | 0.919 |
| EMA    | 2x4    | 0.3 | 1   | 30                      | 120                                 | 0.983 |
| EMA    | 2x4    | 0.3 | 1   | 36                      | 144                                 | 0.995 |
| EMA    | 2x4    | 0.3 | 1   | 40                      | 160                                 | 0.998 |
| EMA    | 2x4    | 0.3 | 1   | 44                      | 176                                 | 0.999 |
| FDA    | 2x2    | 0.3 | 1   | 12                      | 24                                  | 0.185 |

|     |     |     |   |    |     |       |
|-----|-----|-----|---|----|-----|-------|
| FDA | 2x2 | 0.3 | 1 | 16 | 32  | 0.382 |
| FDA | 2x2 | 0.3 | 1 | 24 | 48  | 0.667 |
| FDA | 2x2 | 0.3 | 1 | 28 | 56  | 0.763 |
| FDA | 2x2 | 0.3 | 1 | 32 | 64  | 0.848 |
| FDA | 2x2 | 0.3 | 1 | 36 | 72  | 0.908 |
| FDA | 2x2 | 0.3 | 1 | 40 | 80  | 0.929 |
| FDA | 2x2 | 0.3 | 1 | 44 | 88  | 0.94  |
| FDA | 2x2 | 0.3 | 1 | 60 | 120 | 0.992 |
| FDA | 2x2 | 0.3 | 1 | 72 | 144 | 0.996 |
| FDA | 2x2 | 0.3 | 1 | 80 | 160 | 1     |
| FDA | 2x2 | 0.3 | 1 | 88 | 176 | 0.999 |
| FDA | 3x3 | 0.3 | 1 | 9  | 27  | 0.241 |
| FDA | 3x3 | 0.3 | 1 | 12 | 36  | 0.407 |
| FDA | 3x3 | 0.3 | 1 | 15 | 45  | 0.585 |
| FDA | 3x3 | 0.3 | 1 | 18 | 54  | 0.684 |
| FDA | 3x3 | 0.3 | 1 | 21 | 63  | 0.805 |
| FDA | 3x3 | 0.3 | 1 | 24 | 72  | 0.857 |
| FDA | 3x3 | 0.3 | 1 | 27 | 81  | 0.896 |
| FDA | 3x3 | 0.3 | 1 | 30 | 90  | 0.93  |
| FDA | 3x3 | 0.3 | 1 | 39 | 117 | 0.975 |
| FDA | 3x3 | 0.3 | 1 | 48 | 144 | 0.991 |
| FDA | 3x3 | 0.3 | 1 | 54 | 162 | 0.998 |
| FDA | 3x3 | 0.3 | 1 | 60 | 180 | 1     |
| FDA | 2x4 | 0.3 | 1 | 6  | 24  | 0.164 |
| FDA | 2x4 | 0.3 | 1 | 8  | 32  | 0.266 |
| FDA | 2x4 | 0.3 | 1 | 12 | 48  | 0.571 |
| FDA | 2x4 | 0.3 | 1 | 14 | 56  | 0.677 |
| FDA | 2x4 | 0.3 | 1 | 16 | 64  | 0.798 |
| FDA | 2x4 | 0.3 | 1 | 18 | 72  | 0.856 |
| FDA | 2x4 | 0.3 | 1 | 20 | 80  | 0.902 |
| FDA | 2x4 | 0.3 | 1 | 22 | 88  | 0.926 |
| FDA | 2x4 | 0.3 | 1 | 30 | 120 | 0.981 |
| FDA | 2x4 | 0.3 | 1 | 36 | 144 | 0.995 |
| FDA | 2x4 | 0.3 | 1 | 40 | 160 | 0.998 |
| FDA | 2x4 | 0.3 | 1 | 44 | 176 | 0.999 |
