# Supplementary material for: Model-Based Approach for Designing an Efficient Bioequivalence Study for Highly Variable Drugs
Source: MDPI journal article supplement (doi:10.3390/ph14111101), 2021-10-28
Supplement: s1 [file s1]

**Table S2.** Comparison of power calculated as per the EMA and FDA guidelines among clinical trial designs: 2×2 design, 3×3 design, and 2×4 design. The simulation results are summarized in Figure 3 and Figure 4.

| Agency | Design | CV  | GMR  | Total number of subject | Total number of hospitalization (N) | Power |
|--------|--------|-----|------|-------------------------|-------------------------------------|-------|
| EMA    | 2x2    | 0.2 | 0.9  | 12                      | 24                                  | 0.035 |
| EMA    | 2x2    | 0.2 | 0.9  | 16                      | 32                                  | 0.109 |
| EMA    | 2x2    | 0.2 | 0.9  | 24                      | 48                                  | 0.254 |
| EMA    | 2x2    | 0.2 | 0.9  | 28                      | 56                                  | 0.335 |
| EMA    | 2x2    | 0.2 | 0.9  | 32                      | 64                                  | 0.358 |
| EMA    | 2x2    | 0.2 | 0.9  | 36                      | 72                                  | 0.442 |
| EMA    | 2x2    | 0.2 | 0.9  | 38                      | 76                                  | 0.473 |
| EMA    | 2x2    | 0.2 | 0.9  | 50                      | 100                                 | 0.597 |
| EMA    | 2x2    | 0.2 | 0.9  | 60                      | 120                                 | 0.669 |
| EMA    | 2x2    | 0.2 | 0.9  | 70                      | 140                                 | 0.734 |
| EMA    | 2x2    | 0.2 | 0.9  | 80                      | 160                                 | 0.801 |
| EMA    | 2x2    | 0.2 | 0.9  | 90                      | 180                                 | 0.856 |
| EMA    | 2x2    | 0.2 | 0.9  | 100                     | 200                                 | 0.872 |
| EMA    | 2x2    | 0.2 | 0.9  | 108                     | 216                                 | 0.91  |
| EMA    | 2x2    | 0.2 | 0.9  | 120                     | 240                                 | 0.928 |
| EMA    | 2x2    | 0.2 | 0.9  | 132                     | 264                                 | 0.931 |
| EMA    | 2x2    | 0.2 | 0.9  | 144                     | 288                                 | 0.962 |
| EMA    | 2x2    | 0.2 | 0.9  | 160                     | 320                                 | 0.975 |
| EMA    | 2x2    | 0.2 | 0.95 | 12                      | 24                                  | 0.051 |
| EMA    | 2x2    | 0.2 | 0.95 | 16                      | 32                                  | 0.14  |
| EMA    | 2x2    | 0.2 | 0.95 | 20                      | 40                                  | 0.28  |
| EMA    | 2x2    | 0.2 | 0.95 | 26                      | 52                                  | 0.465 |
| EMA    | 2x2    | 0.2 | 0.95 | 32                      | 64                                  | 0.638 |
| EMA    | 2x2    | 0.2 | 0.95 | 36                      | 72                                  | 0.686 |
| EMA    | 2x2    | 0.2 | 0.95 | 40                      | 80                                  | 0.755 |
| EMA    | 2x2    | 0.2 | 0.95 | 50                      | 100                                 | 0.836 |
| EMA    | 2x2    | 0.2 | 0.95 | 60                      | 120                                 | 0.907 |
| EMA    | 2x2    | 0.2 | 0.95 | 70                      | 140                                 | 0.949 |
| EMA    | 2x2    | 0.2 | 0.95 | 80                      | 160                                 | 0.972 |
| EMA    | 2x2    | 0.2 | 0.95 | 90                      | 180                                 | 0.987 |
| EMA    | 2x2    | 0.2 | 0.95 | 100                     | 200                                 | 0.991 |
| EMA    | 2x2    | 0.2 | 0.95 | 108                     | 216                                 | 0.995 |
| EMA    | 2x2    | 0.2 | 0.95 | 120                     | 240                                 | 0.994 |
| EMA    | 2x2    | 0.2 | 0.95 | 132                     | 264                                 | 0.999 |
| EMA    | 2x2    | 0.2 | 0.95 | 144                     | 288                                 | 0.998 |
| EMA    | 2x2    | 0.2 | 0.95 | 160                     | 320                                 | 1     |
| EMA    | 2x2    | 0.2 | 1    | 12                      | 24                                  | 0.056 |

|     |     |     |      |     |     |       |
|-----|-----|-----|------|-----|-----|-------|
| EMA | 2x2 | 0.2 | 1    | 16  | 32  | 0.165 |
| EMA | 2x2 | 0.2 | 1    | 20  | 40  | 0.303 |
| EMA | 2x2 | 0.2 | 1    | 28  | 56  | 0.578 |
| EMA | 2x2 | 0.2 | 1    | 36  | 72  | 0.743 |
| EMA | 2x2 | 0.2 | 1    | 40  | 80  | 0.801 |
| EMA | 2x2 | 0.2 | 1    | 50  | 100 | 0.917 |
| EMA | 2x2 | 0.2 | 1    | 60  | 120 | 0.96  |
| EMA | 2x2 | 0.2 | 1    | 70  | 140 | 0.977 |
| EMA | 2x2 | 0.2 | 1    | 80  | 160 | 0.99  |
| EMA | 2x2 | 0.2 | 1    | 90  | 180 | 1     |
| EMA | 2x2 | 0.2 | 1    | 100 | 200 | 1     |
| EMA | 2x2 | 0.2 | 1    | 108 | 216 | 0.999 |
| EMA | 2x2 | 0.2 | 1    | 120 | 240 | 1     |
| EMA | 2x2 | 0.2 | 1    | 132 | 264 | 1     |
| EMA | 2x2 | 0.2 | 1    | 144 | 288 | 1     |
| EMA | 2x2 | 0.2 | 1    | 160 | 320 | 1     |
| EMA | 2x2 | 0.2 | 1.05 | 12  | 24  | 0.058 |
| EMA | 2x2 | 0.2 | 1.05 | 18  | 36  | 0.201 |
| EMA | 2x2 | 0.2 | 1.05 | 24  | 48  | 0.387 |
| EMA | 2x2 | 0.2 | 1.05 | 28  | 56  | 0.487 |
| EMA | 2x2 | 0.2 | 1.05 | 32  | 64  | 0.585 |
| EMA | 2x2 | 0.2 | 1.05 | 36  | 72  | 0.632 |
| EMA | 2x2 | 0.2 | 1.05 | 40  | 80  | 0.708 |
| EMA | 2x2 | 0.2 | 1.05 | 50  | 100 | 0.812 |
| EMA | 2x2 | 0.2 | 1.05 | 60  | 120 | 0.883 |
| EMA | 2x2 | 0.2 | 1.05 | 70  | 140 | 0.918 |
| EMA | 2x2 | 0.2 | 1.05 | 80  | 160 | 0.937 |
| EMA | 2x2 | 0.2 | 1.05 | 90  | 180 | 0.96  |
| EMA | 2x2 | 0.2 | 1.05 | 100 | 200 | 0.979 |
| EMA | 2x2 | 0.2 | 1.05 | 108 | 216 | 0.981 |
| EMA | 2x2 | 0.2 | 1.05 | 120 | 240 | 0.994 |
| EMA | 2x2 | 0.2 | 1.05 | 132 | 264 | 0.992 |
| EMA | 2x2 | 0.2 | 1.05 | 144 | 288 | 0.999 |
| EMA | 2x2 | 0.2 | 1.05 | 160 | 320 | 1     |
| EMA | 2x2 | 0.2 | 1.1  | 12  | 24  | 0.039 |
| EMA | 2x2 | 0.2 | 1.1  | 16  | 32  | 0.119 |
| EMA | 2x2 | 0.2 | 1.1  | 20  | 40  | 0.202 |
| EMA | 2x2 | 0.2 | 1.1  | 28  | 56  | 0.346 |
| EMA | 2x2 | 0.2 | 1.1  | 32  | 64  | 0.393 |
| EMA | 2x2 | 0.2 | 1.1  | 36  | 72  | 0.489 |
| EMA | 2x2 | 0.2 | 1.1  | 40  | 80  | 0.523 |

|     |     |     |      |     |     |       |
|-----|-----|-----|------|-----|-----|-------|
| EMA | 2x2 | 0.2 | 1.1  | 44  | 88  | 0.559 |
| EMA | 2x2 | 0.2 | 1.1  | 60  | 120 | 0.671 |
| EMA | 2x2 | 0.2 | 1.1  | 70  | 140 | 0.729 |
| EMA | 2x2 | 0.2 | 1.1  | 80  | 160 | 0.775 |
| EMA | 2x2 | 0.2 | 1.1  | 90  | 180 | 0.789 |
| EMA | 2x2 | 0.2 | 1.1  | 100 | 200 | 0.851 |
| EMA | 2x2 | 0.2 | 1.1  | 108 | 216 | 0.863 |
| EMA | 2x2 | 0.2 | 1.1  | 120 | 240 | 0.922 |
| EMA | 2x2 | 0.2 | 1.1  | 132 | 264 | 0.937 |
| EMA | 2x2 | 0.2 | 1.1  | 144 | 288 | 0.94  |
| EMA | 2x2 | 0.2 | 1.1  | 160 | 320 | 0.964 |
| EMA | 2x2 | 0.3 | 0.9  | 12  | 24  | 0.01  |
| EMA | 2x2 | 0.3 | 0.9  | 24  | 48  | 0.145 |
| EMA | 2x2 | 0.3 | 0.9  | 36  | 72  | 0.329 |
| EMA | 2x2 | 0.3 | 0.9  | 48  | 96  | 0.479 |
| EMA | 2x2 | 0.3 | 0.9  | 60  | 120 | 0.573 |
| EMA | 2x2 | 0.3 | 0.9  | 72  | 144 | 0.613 |
| EMA | 2x2 | 0.3 | 0.9  | 80  | 160 | 0.664 |
| EMA | 2x2 | 0.3 | 0.9  | 88  | 176 | 0.71  |
| EMA | 2x2 | 0.3 | 0.9  | 100 | 200 | 0.753 |
| EMA | 2x2 | 0.3 | 0.9  | 108 | 216 | 0.78  |
| EMA | 2x2 | 0.3 | 0.9  | 120 | 240 | 0.819 |
| EMA | 2x2 | 0.3 | 0.9  | 132 | 264 | 0.861 |
| EMA | 2x2 | 0.3 | 0.9  | 144 | 288 | 0.889 |
| EMA | 2x2 | 0.3 | 0.9  | 160 | 320 | 0.932 |
| EMA | 2x2 | 0.3 | 0.95 | 12  | 24  | 0.023 |
| EMA | 2x2 | 0.3 | 0.95 | 16  | 32  | 0.047 |
| EMA | 2x2 | 0.3 | 0.95 | 24  | 48  | 0.204 |
| EMA | 2x2 | 0.3 | 0.95 | 28  | 56  | 0.28  |
| EMA | 2x2 | 0.3 | 0.95 | 32  | 64  | 0.388 |
| EMA | 2x2 | 0.3 | 0.95 | 36  | 72  | 0.489 |
| EMA | 2x2 | 0.3 | 0.95 | 40  | 80  | 0.568 |
| EMA | 2x2 | 0.3 | 0.95 | 52  | 104 | 0.703 |
| EMA | 2x2 | 0.3 | 0.95 | 60  | 120 | 0.811 |
| EMA | 2x2 | 0.3 | 0.95 | 72  | 144 | 0.852 |
| EMA | 2x2 | 0.3 | 0.95 | 80  | 160 | 0.913 |
| EMA | 2x2 | 0.3 | 0.95 | 88  | 176 | 0.929 |
| EMA | 2x2 | 0.3 | 0.95 | 100 | 200 | 0.955 |
| EMA | 2x2 | 0.3 | 0.95 | 108 | 216 | 0.968 |
| EMA | 2x2 | 0.3 | 0.95 | 120 | 240 | 0.978 |
| EMA | 2x2 | 0.3 | 0.95 | 132 | 264 | 0.984 |

|     |     |     |      |     |     |       |
|-----|-----|-----|------|-----|-----|-------|
| EMA | 2x2 | 0.3 | 0.95 | 144 | 288 | 0.995 |
| EMA | 2x2 | 0.3 | 0.95 | 160 | 320 | 0.993 |
| EMA | 2x2 | 0.3 | 1    | 12  | 24  | 0.018 |
| EMA | 2x2 | 0.3 | 1    | 16  | 32  | 0.044 |
| EMA | 2x2 | 0.3 | 1    | 24  | 48  | 0.228 |
| EMA | 2x2 | 0.3 | 1    | 28  | 56  | 0.338 |
| EMA | 2x2 | 0.3 | 1    | 32  | 64  | 0.445 |
| EMA | 2x2 | 0.3 | 1    | 36  | 72  | 0.53  |
| EMA | 2x2 | 0.3 | 1    | 40  | 80  | 0.61  |
| EMA | 2x2 | 0.3 | 1    | 44  | 88  | 0.662 |
| EMA | 2x2 | 0.3 | 1    | 60  | 120 | 0.834 |
| EMA | 2x2 | 0.3 | 1    | 72  | 144 | 0.921 |
| EMA | 2x2 | 0.3 | 1    | 80  | 160 | 0.948 |
| EMA | 2x2 | 0.3 | 1    | 88  | 176 | 0.978 |
| EMA | 2x2 | 0.3 | 1    | 100 | 200 | 0.987 |
| EMA | 2x2 | 0.3 | 1    | 108 | 216 | 0.992 |
| EMA | 2x2 | 0.3 | 1    | 120 | 240 | 0.995 |
| EMA | 2x2 | 0.3 | 1    | 132 | 264 | 0.999 |
| EMA | 2x2 | 0.3 | 1    | 144 | 288 | 0.999 |
| EMA | 2x2 | 0.3 | 1    | 160 | 320 | 0.999 |
| EMA | 2x2 | 0.3 | 1.05 | 12  | 24  | 0.018 |
| EMA | 2x2 | 0.3 | 1.05 | 16  | 32  | 0.036 |
| EMA | 2x2 | 0.3 | 1.05 | 24  | 48  | 0.188 |
| EMA | 2x2 | 0.3 | 1.05 | 28  | 56  | 0.299 |
| EMA | 2x2 | 0.3 | 1.05 | 32  | 64  | 0.367 |
| EMA | 2x2 | 0.3 | 1.05 | 38  | 76  | 0.496 |
| EMA | 2x2 | 0.3 | 1.05 | 40  | 80  | 0.517 |
| EMA | 2x2 | 0.3 | 1.05 | 48  | 96  | 0.636 |
| EMA | 2x2 | 0.3 | 1.05 | 52  | 104 | 0.684 |
| EMA | 2x2 | 0.3 | 1.05 | 60  | 120 | 0.719 |
| EMA | 2x2 | 0.3 | 1.05 | 72  | 144 | 0.845 |
| EMA | 2x2 | 0.3 | 1.05 | 80  | 160 | 0.86  |
| EMA | 2x2 | 0.3 | 1.05 | 88  | 176 | 0.885 |
| EMA | 2x2 | 0.3 | 1.05 | 100 | 200 | 0.936 |
| EMA | 2x2 | 0.3 | 1.05 | 108 | 216 | 0.952 |
| EMA | 2x2 | 0.3 | 1.05 | 120 | 240 | 0.974 |
| EMA | 2x2 | 0.3 | 1.05 | 132 | 264 | 0.978 |
| EMA | 2x2 | 0.3 | 1.05 | 144 | 288 | 0.978 |
| EMA | 2x2 | 0.3 | 1.05 | 160 | 320 | 0.988 |
| EMA | 2x2 | 0.3 | 1.1  | 12  | 24  | 0.012 |
| EMA | 2x2 | 0.3 | 1.1  | 24  | 48  | 0.138 |

|     |     |     |      |     |     |       |
|-----|-----|-----|------|-----|-----|-------|
| EMA | 2x2 | 0.3 | 1.1  | 36  | 72  | 0.329 |
| EMA | 2x2 | 0.3 | 1.1  | 48  | 96  | 0.458 |
| EMA | 2x2 | 0.3 | 1.1  | 60  | 120 | 0.519 |
| EMA | 2x2 | 0.3 | 1.1  | 68  | 136 | 0.569 |
| EMA | 2x2 | 0.3 | 1.1  | 76  | 152 | 0.658 |
| EMA | 2x2 | 0.3 | 1.1  | 84  | 168 | 0.699 |
| EMA | 2x2 | 0.3 | 1.1  | 92  | 184 | 0.679 |
| EMA | 2x2 | 0.3 | 1.1  | 100 | 200 | 0.74  |
| EMA | 2x2 | 0.3 | 1.1  | 72  | 144 | 0.594 |
| EMA | 2x2 | 0.3 | 1.1  | 80  | 160 | 0.645 |
| EMA | 2x2 | 0.3 | 1.1  | 88  | 176 | 0.701 |
| EMA | 2x2 | 0.3 | 1.1  | 100 | 200 | 0.743 |
| EMA | 2x2 | 0.3 | 1.1  | 108 | 216 | 0.761 |
| EMA | 2x2 | 0.3 | 1.1  | 120 | 240 | 0.805 |
| EMA | 2x2 | 0.3 | 1.1  | 132 | 264 | 0.83  |
| EMA | 2x2 | 0.3 | 1.1  | 144 | 288 | 0.893 |
| EMA | 2x2 | 0.3 | 1.1  | 160 | 320 | 0.904 |
| EMA | 2x2 | 0.4 | 0.9  | 12  | 24  | 0.004 |
| EMA | 2x2 | 0.4 | 0.9  | 24  | 48  | 0.058 |
| EMA | 2x2 | 0.4 | 0.9  | 36  | 72  | 0.183 |
| EMA | 2x2 | 0.4 | 0.9  | 48  | 96  | 0.334 |
| EMA | 2x2 | 0.4 | 0.9  | 56  | 112 | 0.369 |
| EMA | 2x2 | 0.4 | 0.9  | 64  | 128 | 0.473 |
| EMA | 2x2 | 0.4 | 0.9  | 68  | 136 | 0.469 |
| EMA | 2x2 | 0.4 | 0.9  | 76  | 152 | 0.54  |
| EMA | 2x2 | 0.4 | 0.9  | 84  | 168 | 0.572 |
| EMA | 2x2 | 0.4 | 0.9  | 96  | 192 | 0.643 |
| EMA | 2x2 | 0.4 | 0.9  | 108 | 216 | 0.671 |
| EMA | 2x2 | 0.4 | 0.9  | 120 | 240 | 0.716 |
| EMA | 2x2 | 0.4 | 0.9  | 132 | 264 | 0.776 |
| EMA | 2x2 | 0.4 | 0.9  | 144 | 288 | 0.777 |
| EMA | 2x2 | 0.4 | 0.9  | 160 | 320 | 0.813 |
| EMA | 2x2 | 0.4 | 0.95 | 12  | 24  | 0.009 |
| EMA | 2x2 | 0.4 | 0.95 | 24  | 48  | 0.077 |
| EMA | 2x2 | 0.4 | 0.95 | 36  | 72  | 0.266 |
| EMA | 2x2 | 0.4 | 0.95 | 40  | 80  | 0.338 |
| EMA | 2x2 | 0.4 | 0.95 | 44  | 88  | 0.42  |
| EMA | 2x2 | 0.4 | 0.95 | 52  | 104 | 0.535 |
| EMA | 2x2 | 0.4 | 0.95 | 56  | 112 | 0.584 |
| EMA | 2x2 | 0.4 | 0.95 | 64  | 128 | 0.665 |
| EMA | 2x2 | 0.4 | 0.95 | 68  | 136 | 0.663 |

|     |     |     |      |     |     |       |
|-----|-----|-----|------|-----|-----|-------|
| EMA | 2x2 | 0.4 | 0.95 | 76  | 152 | 0.749 |
| EMA | 2x2 | 0.4 | 0.95 | 84  | 168 | 0.818 |
| EMA | 2x2 | 0.4 | 0.95 | 96  | 192 | 0.859 |
| EMA | 2x2 | 0.4 | 0.95 | 108 | 216 | 0.908 |
| EMA | 2x2 | 0.4 | 0.95 | 120 | 240 | 0.932 |
| EMA | 2x2 | 0.4 | 0.95 | 132 | 264 | 0.95  |
| EMA | 2x2 | 0.4 | 0.95 | 144 | 288 | 0.97  |
| EMA | 2x2 | 0.4 | 0.95 | 160 | 320 | 0.981 |
| EMA | 2x2 | 0.4 | 1    | 12  | 24  | 0.007 |
| EMA | 2x2 | 0.4 | 1    | 24  | 48  | 0.07  |
| EMA | 2x2 | 0.4 | 1    | 36  | 72  | 0.29  |
| EMA | 2x2 | 0.4 | 1    | 40  | 80  | 0.385 |
| EMA | 2x2 | 0.4 | 1    | 48  | 96  | 0.521 |
| EMA | 2x2 | 0.4 | 1    | 56  | 112 | 0.65  |
| EMA | 2x2 | 0.4 | 1    | 64  | 128 | 0.737 |
| EMA | 2x2 | 0.4 | 1    | 68  | 136 | 0.787 |
| EMA | 2x2 | 0.4 | 1    | 76  | 152 | 0.809 |
| EMA | 2x2 | 0.4 | 1    | 84  | 168 | 0.866 |
| EMA | 2x2 | 0.4 | 1    | 96  | 192 | 0.924 |
| EMA | 2x2 | 0.4 | 1    | 108 | 216 | 0.944 |
| EMA | 2x2 | 0.4 | 1    | 120 | 240 | 0.971 |
| EMA | 2x2 | 0.4 | 1    | 132 | 264 | 0.978 |
| EMA | 2x2 | 0.4 | 1    | 144 | 288 | 0.985 |
| EMA | 2x2 | 0.4 | 1    | 160 | 320 | 0.994 |
| EMA | 2x2 | 0.4 | 1.05 | 12  | 24  | 0.005 |
| EMA | 2x2 | 0.4 | 1.05 | 24  | 48  | 0.053 |
| EMA | 2x2 | 0.4 | 1.05 | 36  | 72  | 0.268 |
| EMA | 2x2 | 0.4 | 1.05 | 40  | 80  | 0.336 |
| EMA | 2x2 | 0.4 | 1.05 | 44  | 88  | 0.397 |
| EMA | 2x2 | 0.4 | 1.05 | 52  | 104 | 0.51  |
| EMA | 2x2 | 0.4 | 1.05 | 60  | 120 | 0.574 |
| EMA | 2x2 | 0.4 | 1.05 | 64  | 128 | 0.661 |
| EMA | 2x2 | 0.4 | 1.05 | 68  | 136 | 0.66  |
| EMA | 2x2 | 0.4 | 1.05 | 76  | 152 | 0.735 |
| EMA | 2x2 | 0.4 | 1.05 | 84  | 168 | 0.774 |
| EMA | 2x2 | 0.4 | 1.05 | 96  | 192 | 0.84  |
| EMA | 2x2 | 0.4 | 1.05 | 108 | 216 | 0.882 |
| EMA | 2x2 | 0.4 | 1.05 | 120 | 240 | 0.891 |
| EMA | 2x2 | 0.4 | 1.05 | 132 | 264 | 0.934 |
| EMA | 2x2 | 0.4 | 1.05 | 144 | 288 | 0.945 |
| EMA | 2x2 | 0.4 | 1.05 | 160 | 320 | 0.962 |

|     |     |     |      |     |     |       |
|-----|-----|-----|------|-----|-----|-------|
| EMA | 2x2 | 0.4 | 1.1  | 12  | 24  | 0.005 |
| EMA | 2x2 | 0.4 | 1.1  | 24  | 48  | 0.056 |
| EMA | 2x2 | 0.4 | 1.1  | 36  | 72  | 0.197 |
| EMA | 2x2 | 0.4 | 1.1  | 48  | 96  | 0.336 |
| EMA | 2x2 | 0.4 | 1.1  | 56  | 112 | 0.389 |
| EMA | 2x2 | 0.4 | 1.1  | 64  | 128 | 0.457 |
| EMA | 2x2 | 0.4 | 1.1  | 72  | 144 | 0.519 |
| EMA | 2x2 | 0.4 | 1.1  | 80  | 160 | 0.531 |
| EMA | 2x2 | 0.4 | 1.1  | 88  | 176 | 0.593 |
| EMA | 2x2 | 0.4 | 1.1  | 96  | 192 | 0.606 |
| EMA | 2x2 | 0.4 | 1.1  | 108 | 216 | 0.683 |
| EMA | 2x2 | 0.4 | 1.1  | 120 | 240 | 0.713 |
| EMA | 2x2 | 0.4 | 1.1  | 132 | 264 | 0.756 |
| EMA | 2x2 | 0.4 | 1.1  | 144 | 288 | 0.782 |
| EMA | 2x2 | 0.4 | 1.1  | 160 | 320 | 0.804 |
| EMA | 2x2 | 0.5 | 0.9  | 12  | 24  | 0     |
| EMA | 2x2 | 0.5 | 0.9  | 24  | 48  | 0.012 |
| EMA | 2x2 | 0.5 | 0.9  | 36  | 72  | 0.08  |
| EMA | 2x2 | 0.5 | 0.9  | 48  | 96  | 0.204 |
| EMA | 2x2 | 0.5 | 0.9  | 56  | 112 | 0.284 |
| EMA | 2x2 | 0.5 | 0.9  | 64  | 128 | 0.364 |
| EMA | 2x2 | 0.5 | 0.9  | 72  | 144 | 0.403 |
| EMA | 2x2 | 0.5 | 0.9  | 80  | 160 | 0.437 |
| EMA | 2x2 | 0.5 | 0.9  | 88  | 176 | 0.472 |
| EMA | 2x2 | 0.5 | 0.9  | 96  | 192 | 0.535 |
| EMA | 2x2 | 0.5 | 0.9  | 108 | 216 | 0.581 |
| EMA | 2x2 | 0.5 | 0.9  | 120 | 240 | 0.619 |
| EMA | 2x2 | 0.5 | 0.9  | 132 | 264 | 0.679 |
| EMA | 2x2 | 0.5 | 0.9  | 144 | 288 | 0.694 |
| EMA | 2x2 | 0.5 | 0.9  | 160 | 320 | 0.752 |
| EMA | 2x2 | 0.5 | 0.95 | 12  | 24  | 0     |
| EMA | 2x2 | 0.5 | 0.95 | 24  | 48  | 0.013 |
| EMA | 2x2 | 0.5 | 0.95 | 36  | 72  | 0.13  |
| EMA | 2x2 | 0.5 | 0.95 | 44  | 88  | 0.252 |
| EMA | 2x2 | 0.5 | 0.95 | 52  | 104 | 0.364 |
| EMA | 2x2 | 0.5 | 0.95 | 56  | 112 | 0.408 |
| EMA | 2x2 | 0.5 | 0.95 | 64  | 128 | 0.49  |
| EMA | 2x2 | 0.5 | 0.95 | 72  | 144 | 0.581 |
| EMA | 2x2 | 0.5 | 0.95 | 80  | 160 | 0.65  |
| EMA | 2x2 | 0.5 | 0.95 | 88  | 176 | 0.737 |
| EMA | 2x2 | 0.5 | 0.95 | 96  | 192 | 0.772 |

|     |     |     |      |     |     |       |
|-----|-----|-----|------|-----|-----|-------|
| EMA | 2x2 | 0.5 | 0.95 | 108 | 216 | 0.821 |
| EMA | 2x2 | 0.5 | 0.95 | 120 | 240 | 0.862 |
| EMA | 2x2 | 0.5 | 0.95 | 132 | 264 | 0.889 |
| EMA | 2x2 | 0.5 | 0.95 | 144 | 288 | 0.924 |
| EMA | 2x2 | 0.5 | 0.95 | 160 | 320 | 0.946 |
| EMA | 2x2 | 0.5 | 1    | 12  | 24  | 0.004 |
| EMA | 2x2 | 0.5 | 1    | 24  | 48  | 0.022 |
| EMA | 2x2 | 0.5 | 1    | 36  | 72  | 0.11  |
| EMA | 2x2 | 0.5 | 1    | 40  | 80  | 0.174 |
| EMA | 2x2 | 0.5 | 1    | 48  | 96  | 0.298 |
| EMA | 2x2 | 0.5 | 1    | 52  | 104 | 0.378 |
| EMA | 2x2 | 0.5 | 1    | 56  | 112 | 0.41  |
| EMA | 2x2 | 0.5 | 1    | 64  | 128 | 0.566 |
| EMA | 2x2 | 0.5 | 1    | 72  | 144 | 0.654 |
| EMA | 2x2 | 0.5 | 1    | 80  | 160 | 0.712 |
| EMA | 2x2 | 0.5 | 1    | 88  | 176 | 0.752 |
| EMA | 2x2 | 0.5 | 1    | 96  | 192 | 0.8   |
| EMA | 2x2 | 0.5 | 1    | 108 | 216 | 0.862 |
| EMA | 2x2 | 0.5 | 1    | 120 | 240 | 0.911 |
| EMA | 2x2 | 0.5 | 1    | 132 | 264 | 0.937 |
| EMA | 2x2 | 0.5 | 1    | 144 | 288 | 0.954 |
| EMA | 2x2 | 0.5 | 1    | 160 | 320 | 0.976 |
| EMA | 2x2 | 0.5 | 1.05 | 12  | 24  | 0.002 |
| EMA | 2x2 | 0.5 | 1.05 | 24  | 48  | 0.011 |
| EMA | 2x2 | 0.5 | 1.05 | 36  | 72  | 0.121 |
| EMA | 2x2 | 0.5 | 1.05 | 44  | 88  | 0.241 |
| EMA | 2x2 | 0.5 | 1.05 | 48  | 96  | 0.291 |
| EMA | 2x2 | 0.5 | 1.05 | 56  | 112 | 0.387 |
| EMA | 2x2 | 0.5 | 1.05 | 64  | 128 | 0.463 |
| EMA | 2x2 | 0.5 | 1.05 | 72  | 144 | 0.56  |
| EMA | 2x2 | 0.5 | 1.05 | 80  | 160 | 0.631 |
| EMA | 2x2 | 0.5 | 1.05 | 88  | 176 | 0.684 |
| EMA | 2x2 | 0.5 | 1.05 | 96  | 192 | 0.72  |
| EMA | 2x2 | 0.5 | 1.05 | 108 | 216 | 0.759 |
| EMA | 2x2 | 0.5 | 1.05 | 120 | 240 | 0.835 |
| EMA | 2x2 | 0.5 | 1.05 | 132 | 264 | 0.859 |
| EMA | 2x2 | 0.5 | 1.05 | 144 | 288 | 0.865 |
| EMA | 2x2 | 0.5 | 1.05 | 160 | 320 | 0.911 |
| EMA | 2x2 | 0.5 | 1.1  | 12  | 24  | 0.002 |
| EMA | 2x2 | 0.5 | 1.1  | 24  | 48  | 0.008 |
| EMA | 2x2 | 0.5 | 1.1  | 36  | 72  | 0.11  |



|     |     |     |      |     |     |       |
|-----|-----|-----|------|-----|-----|-------|
| EMA | 2x2 | 0.5 | 1.1  | 44  | 88  | 0.202 |
| EMA | 2x2 | 0.5 | 1.1  | 56  | 112 | 0.298 |
| EMA | 2x2 | 0.5 | 1.1  | 68  | 136 | 0.376 |
| EMA | 2x2 | 0.5 | 1.1  | 72  | 144 | 0.414 |
| EMA | 2x2 | 0.5 | 1.1  | 76  | 152 | 0.437 |
| EMA | 2x2 | 0.5 | 1.1  | 80  | 160 | 0.45  |
| EMA | 2x2 | 0.5 | 1.1  | 88  | 176 | 0.505 |
| EMA | 2x2 | 0.5 | 1.1  | 96  | 192 | 0.525 |
| EMA | 2x2 | 0.5 | 1.1  | 108 | 216 | 0.57  |
| EMA | 2x2 | 0.5 | 1.1  | 120 | 240 | 0.598 |
| EMA | 2x2 | 0.5 | 1.1  | 132 | 264 | 0.653 |
| EMA | 2x2 | 0.5 | 1.1  | 144 | 288 | 0.718 |
| EMA | 2x2 | 0.5 | 1.1  | 160 | 320 | 0.739 |
| EMA | 2x2 | 0.6 | 0.9  | 12  | 24  | 0     |
| EMA | 2x2 | 0.6 | 0.9  | 20  | 40  | 0.001 |
| EMA | 2x2 | 0.6 | 0.9  | 28  | 56  | 0.004 |
| EMA | 2x2 | 0.6 | 0.9  | 36  | 72  | 0.034 |
| EMA | 2x2 | 0.6 | 0.9  | 44  | 88  | 0.076 |
| EMA | 2x2 | 0.6 | 0.9  | 52  | 104 | 0.126 |
| EMA | 2x2 | 0.6 | 0.9  | 64  | 128 | 0.275 |
| EMA | 2x2 | 0.6 | 0.9  | 72  | 144 | 0.306 |
| EMA | 2x2 | 0.6 | 0.9  | 80  | 160 | 0.37  |
| EMA | 2x2 | 0.6 | 0.9  | 92  | 184 | 0.429 |
| EMA | 2x2 | 0.6 | 0.9  | 100 | 200 | 0.443 |
| EMA | 2x2 | 0.6 | 0.9  | 108 | 216 | 0.489 |
| EMA | 2x2 | 0.6 | 0.9  | 120 | 240 | 0.528 |
| EMA | 2x2 | 0.6 | 0.9  | 132 | 264 | 0.611 |
| EMA | 2x2 | 0.6 | 0.9  | 144 | 288 | 0.597 |
| EMA | 2x2 | 0.6 | 0.9  | 160 | 320 | 0.652 |
| EMA | 2x2 | 0.6 | 0.95 | 12  | 24  | 0     |
| EMA | 2x2 | 0.6 | 0.95 | 20  | 40  | 0.004 |
| EMA | 2x2 | 0.6 | 0.95 | 28  | 56  | 0.012 |
| EMA | 2x2 | 0.6 | 0.95 | 36  | 72  | 0.045 |
| EMA | 2x2 | 0.6 | 0.95 | 44  | 88  | 0.094 |
| EMA | 2x2 | 0.6 | 0.95 | 52  | 104 | 0.197 |
| EMA | 2x2 | 0.6 | 0.95 | 60  | 120 | 0.283 |
| EMA | 2x2 | 0.6 | 0.95 | 64  | 128 | 0.322 |
| EMA | 2x2 | 0.6 | 0.95 | 72  | 144 | 0.439 |
| EMA | 2x2 | 0.6 | 0.95 | 80  | 160 | 0.495 |
| EMA | 2x2 | 0.6 | 0.95 | 92  | 184 | 0.578 |
| EMA | 2x2 | 0.6 | 0.95 | 100 | 200 | 0.64  |

|     |     |     |      |     |     |       |
|-----|-----|-----|------|-----|-----|-------|
| EMA | 2x2 | 0.6 | 0.95 | 108 | 216 | 0.695 |
| EMA | 2x2 | 0.6 | 0.95 | 120 | 240 | 0.774 |
| EMA | 2x2 | 0.6 | 0.95 | 132 | 264 | 0.806 |
| EMA | 2x2 | 0.6 | 0.95 | 144 | 288 | 0.824 |
| EMA | 2x2 | 0.6 | 0.95 | 160 | 320 | 0.845 |
| EMA | 2x2 | 0.6 | 1    | 12  | 24  | 0     |
| EMA | 2x2 | 0.6 | 1    | 20  | 40  | 0.004 |
| EMA | 2x2 | 0.6 | 1    | 28  | 56  | 0.009 |
| EMA | 2x2 | 0.6 | 1    | 36  | 72  | 0.034 |
| EMA | 2x2 | 0.6 | 1    | 44  | 88  | 0.114 |
| EMA | 2x2 | 0.6 | 1    | 48  | 96  | 0.165 |
| EMA | 2x2 | 0.6 | 1    | 52  | 104 | 0.214 |
| EMA | 2x2 | 0.6 | 1    | 60  | 120 | 0.329 |
| EMA | 2x2 | 0.6 | 1    | 72  | 144 | 0.482 |
| EMA | 2x2 | 0.6 | 1    | 80  | 160 | 0.559 |
| EMA | 2x2 | 0.6 | 1    | 92  | 184 | 0.658 |
| EMA | 2x2 | 0.6 | 1    | 100 | 200 | 0.714 |
| EMA | 2x2 | 0.6 | 1    | 108 | 216 | 0.763 |
| EMA | 2x2 | 0.6 | 1    | 120 | 240 | 0.815 |
| EMA | 2x2 | 0.6 | 1    | 132 | 264 | 0.864 |
| EMA | 2x2 | 0.6 | 1    | 144 | 288 | 0.889 |
| EMA | 2x2 | 0.6 | 1    | 160 | 320 | 0.93  |
| EMA | 2x2 | 0.6 | 1.05 | 12  | 24  | 0     |
| EMA | 2x2 | 0.6 | 1.05 | 20  | 40  | 0.004 |
| EMA | 2x2 | 0.6 | 1.05 | 28  | 56  | 0.015 |
| EMA | 2x2 | 0.6 | 1.05 | 36  | 72  | 0.038 |
| EMA | 2x2 | 0.6 | 1.05 | 44  | 88  | 0.105 |
| EMA | 2x2 | 0.6 | 1.05 | 48  | 96  | 0.14  |
| EMA | 2x2 | 0.6 | 1.05 | 52  | 104 | 0.207 |
| EMA | 2x2 | 0.6 | 1.05 | 64  | 128 | 0.334 |
| EMA | 2x2 | 0.6 | 1.05 | 72  | 144 | 0.445 |
| EMA | 2x2 | 0.6 | 1.05 | 80  | 160 | 0.501 |
| EMA | 2x2 | 0.6 | 1.05 | 92  | 184 | 0.579 |
| EMA | 2x2 | 0.6 | 1.05 | 100 | 200 | 0.633 |
| EMA | 2x2 | 0.6 | 1.05 | 108 | 216 | 0.682 |
| EMA | 2x2 | 0.6 | 1.05 | 120 | 240 | 0.743 |
| EMA | 2x2 | 0.6 | 1.05 | 132 | 264 | 0.761 |
| EMA | 2x2 | 0.6 | 1.05 | 144 | 288 | 0.805 |
| EMA | 2x2 | 0.6 | 1.05 | 160 | 320 | 0.847 |
| EMA | 2x2 | 0.6 | 1.1  | 12  | 24  | 0     |
| EMA | 2x2 | 0.6 | 1.1  | 24  | 48  | 0.002 |

|     |     |     |      |     |     |       |
|-----|-----|-----|------|-----|-----|-------|
| EMA | 2x2 | 0.6 | 1.1  | 36  | 72  | 0.037 |
| EMA | 2x2 | 0.6 | 1.1  | 48  | 96  | 0.119 |
| EMA | 2x2 | 0.6 | 1.1  | 60  | 120 | 0.233 |
| EMA | 2x2 | 0.6 | 1.1  | 64  | 128 | 0.277 |
| EMA | 2x2 | 0.6 | 1.1  | 72  | 144 | 0.325 |
| EMA | 2x2 | 0.6 | 1.1  | 84  | 168 | 0.407 |
| EMA | 2x2 | 0.6 | 1.1  | 92  | 184 | 0.436 |
| EMA | 2x2 | 0.6 | 1.1  | 100 | 200 | 0.451 |
| EMA | 2x2 | 0.6 | 1.1  | 108 | 216 | 0.494 |
| EMA | 2x2 | 0.6 | 1.1  | 120 | 240 | 0.5   |
| EMA | 2x2 | 0.6 | 1.1  | 132 | 264 | 0.58  |
| EMA | 2x2 | 0.6 | 1.1  | 144 | 288 | 0.614 |
| EMA | 2x2 | 0.6 | 1.1  | 160 | 320 | 0.637 |
| EMA | 3x3 | 0.2 | 0.9  | 9   | 27  | 0.07  |
| EMA | 3x3 | 0.2 | 0.9  | 12  | 36  | 0.168 |
| EMA | 3x3 | 0.2 | 0.9  | 15  | 45  | 0.279 |
| EMA | 3x3 | 0.2 | 0.9  | 18  | 54  | 0.363 |
| EMA | 3x3 | 0.2 | 0.9  | 21  | 63  | 0.428 |
| EMA | 3x3 | 0.2 | 0.9  | 24  | 72  | 0.49  |
| EMA | 3x3 | 0.2 | 0.9  | 27  | 81  | 0.5   |
| EMA | 3x3 | 0.2 | 0.9  | 33  | 99  | 0.63  |
| EMA | 3x3 | 0.2 | 0.9  | 39  | 117 | 0.644 |
| EMA | 3x3 | 0.2 | 0.9  | 45  | 135 | 0.72  |
| EMA | 3x3 | 0.2 | 0.9  | 54  | 162 | 0.811 |
| EMA | 3x3 | 0.2 | 0.9  | 60  | 180 | 0.811 |
| EMA | 3x3 | 0.2 | 0.9  | 66  | 198 | 0.848 |
| EMA | 3x3 | 0.2 | 0.9  | 75  | 225 | 0.897 |
| EMA | 3x3 | 0.2 | 0.9  | 81  | 243 | 0.896 |
| EMA | 3x3 | 0.2 | 0.9  | 90  | 270 | 0.932 |
| EMA | 3x3 | 0.2 | 0.9  | 96  | 288 | 0.943 |
| EMA | 3x3 | 0.2 | 0.9  | 105 | 315 | 0.963 |
| EMA | 3x3 | 0.2 | 0.95 | 9   | 27  | 0.093 |
| EMA | 3x3 | 0.2 | 0.95 | 12  | 36  | 0.225 |
| EMA | 3x3 | 0.2 | 0.95 | 15  | 45  | 0.363 |
| EMA | 3x3 | 0.2 | 0.95 | 18  | 54  | 0.475 |
| EMA | 3x3 | 0.2 | 0.95 | 21  | 63  | 0.592 |
| EMA | 3x3 | 0.2 | 0.95 | 24  | 72  | 0.665 |
| EMA | 3x3 | 0.2 | 0.95 | 27  | 81  | 0.705 |
| EMA | 3x3 | 0.2 | 0.95 | 33  | 99  | 0.824 |
| EMA | 3x3 | 0.2 | 0.95 | 39  | 117 | 0.893 |
| EMA | 3x3 | 0.2 | 0.95 | 45  | 135 | 0.921 |

|     |     |     |      |     |     |       |
|-----|-----|-----|------|-----|-----|-------|
| EMA | 3x3 | 0.2 | 0.95 | 54  | 162 | 0.962 |
| EMA | 3x3 | 0.2 | 0.95 | 60  | 180 | 0.97  |
| EMA | 3x3 | 0.2 | 0.95 | 66  | 198 | 0.986 |
| EMA | 3x3 | 0.2 | 0.95 | 75  | 225 | 0.984 |
| EMA | 3x3 | 0.2 | 0.95 | 81  | 243 | 0.995 |
| EMA | 3x3 | 0.2 | 0.95 | 90  | 270 | 0.996 |
| EMA | 3x3 | 0.2 | 0.95 | 96  | 288 | 0.997 |
| EMA | 3x3 | 0.2 | 0.95 | 105 | 315 | 0.997 |
| EMA | 3x3 | 0.2 | 1    | 9   | 27  | 0.105 |
| EMA | 3x3 | 0.2 | 1    | 12  | 36  | 0.254 |
| EMA | 3x3 | 0.2 | 1    | 15  | 45  | 0.413 |
| EMA | 3x3 | 0.2 | 1    | 18  | 54  | 0.529 |
| EMA | 3x3 | 0.2 | 1    | 24  | 72  | 0.716 |
| EMA | 3x3 | 0.2 | 1    | 27  | 81  | 0.81  |
| EMA | 3x3 | 0.2 | 1    | 33  | 99  | 0.875 |
| EMA | 3x3 | 0.2 | 1    | 39  | 117 | 0.92  |
| EMA | 3x3 | 0.2 | 1    | 45  | 135 | 0.961 |
| EMA | 3x3 | 0.2 | 1    | 54  | 162 | 0.979 |
| EMA | 3x3 | 0.2 | 1    | 60  | 180 | 0.988 |
| EMA | 3x3 | 0.2 | 1    | 66  | 198 | 0.992 |
| EMA | 3x3 | 0.2 | 1    | 75  | 225 | 0.997 |
| EMA | 3x3 | 0.2 | 1    | 81  | 243 | 0.997 |
| EMA | 3x3 | 0.2 | 1    | 90  | 270 | 1     |
| EMA | 3x3 | 0.2 | 1    | 96  | 288 | 0.999 |
| EMA | 3x3 | 0.2 | 1    | 105 | 315 | 1     |
| EMA | 3x3 | 0.2 | 1.05 | 9   | 27  | 0.102 |
| EMA | 3x3 | 0.2 | 1.05 | 12  | 36  | 0.231 |
| EMA | 3x3 | 0.2 | 1.05 | 15  | 45  | 0.355 |
| EMA | 3x3 | 0.2 | 1.05 | 18  | 54  | 0.466 |
| EMA | 3x3 | 0.2 | 1.05 | 21  | 63  | 0.558 |
| EMA | 3x3 | 0.2 | 1.05 | 24  | 72  | 0.624 |
| EMA | 3x3 | 0.2 | 1.05 | 27  | 81  | 0.681 |
| EMA | 3x3 | 0.2 | 1.05 | 33  | 99  | 0.766 |
| EMA | 3x3 | 0.2 | 1.05 | 39  | 117 | 0.864 |
| EMA | 3x3 | 0.2 | 1.05 | 45  | 135 | 0.893 |
| EMA | 3x3 | 0.2 | 1.05 | 54  | 162 | 0.931 |
| EMA | 3x3 | 0.2 | 1.05 | 60  | 180 | 0.946 |
| EMA | 3x3 | 0.2 | 1.05 | 66  | 198 | 0.971 |
| EMA | 3x3 | 0.2 | 1.05 | 75  | 225 | 0.971 |
| EMA | 3x3 | 0.2 | 1.05 | 81  | 243 | 0.985 |
| EMA | 3x3 | 0.2 | 1.05 | 90  | 270 | 0.991 |

|     |     |     |      |     |     |       |
|-----|-----|-----|------|-----|-----|-------|
| EMA | 3x3 | 0.2 | 1.05 | 96  | 288 | 0.995 |
| EMA | 3x3 | 0.2 | 1.05 | 105 | 315 | 0.996 |
| EMA | 3x3 | 0.2 | 1.1  | 9   | 27  | 0.081 |
| EMA | 3x3 | 0.2 | 1.1  | 12  | 36  | 0.171 |
| EMA | 3x3 | 0.2 | 1.1  | 15  | 45  | 0.289 |
| EMA | 3x3 | 0.2 | 1.1  | 18  | 54  | 0.365 |
| EMA | 3x3 | 0.2 | 1.1  | 21  | 63  | 0.427 |
| EMA | 3x3 | 0.2 | 1.1  | 24  | 72  | 0.448 |
| EMA | 3x3 | 0.2 | 1.1  | 27  | 81  | 0.502 |
| EMA | 3x3 | 0.2 | 1.1  | 30  | 90  | 0.558 |
| EMA | 3x3 | 0.2 | 1.1  | 39  | 117 | 0.65  |
| EMA | 3x3 | 0.2 | 1.1  | 45  | 135 | 0.708 |
| EMA | 3x3 | 0.2 | 1.1  | 54  | 162 | 0.76  |
| EMA | 3x3 | 0.2 | 1.1  | 60  | 180 | 0.804 |
| EMA | 3x3 | 0.2 | 1.1  | 66  | 198 | 0.826 |
| EMA | 3x3 | 0.2 | 1.1  | 75  | 225 | 0.872 |
| EMA | 3x3 | 0.2 | 1.1  | 81  | 243 | 0.887 |
| EMA | 3x3 | 0.2 | 1.1  | 90  | 270 | 0.92  |
| EMA | 3x3 | 0.2 | 1.1  | 96  | 288 | 0.942 |
| EMA | 3x3 | 0.2 | 1.1  | 105 | 315 | 0.953 |
| EMA | 3x3 | 0.3 | 0.9  | 9   | 27  | 0.017 |
| EMA | 3x3 | 0.3 | 0.9  | 15  | 45  | 0.141 |
| EMA | 3x3 | 0.3 | 0.9  | 24  | 72  | 0.345 |
| EMA | 3x3 | 0.3 | 0.9  | 33  | 99  | 0.485 |
| EMA | 3x3 | 0.3 | 0.9  | 39  | 117 | 0.54  |
| EMA | 3x3 | 0.3 | 0.9  | 48  | 144 | 0.627 |
| EMA | 3x3 | 0.3 | 0.9  | 54  | 162 | 0.682 |
| EMA | 3x3 | 0.3 | 0.9  | 60  | 180 | 0.728 |
| EMA | 3x3 | 0.3 | 0.9  | 66  | 198 | 0.734 |
| EMA | 3x3 | 0.3 | 0.9  | 75  | 225 | 0.762 |
| EMA | 3x3 | 0.3 | 0.9  | 81  | 243 | 0.812 |
| EMA | 3x3 | 0.3 | 0.9  | 90  | 270 | 0.842 |
| EMA | 3x3 | 0.3 | 0.9  | 96  | 288 | 0.839 |
| EMA | 3x3 | 0.3 | 0.9  | 105 | 315 | 0.896 |
| EMA | 3x3 | 0.3 | 0.95 | 9   | 27  | 0.026 |
| EMA | 3x3 | 0.3 | 0.95 | 12  | 36  | 0.064 |
| EMA | 3x3 | 0.3 | 0.95 | 15  | 45  | 0.186 |
| EMA | 3x3 | 0.3 | 0.95 | 18  | 54  | 0.295 |
| EMA | 3x3 | 0.3 | 0.95 | 21  | 63  | 0.376 |
| EMA | 3x3 | 0.3 | 0.95 | 24  | 72  | 0.48  |
| EMA | 3x3 | 0.3 | 0.95 | 27  | 81  | 0.55  |

|     |     |     |      |     |     |       |
|-----|-----|-----|------|-----|-----|-------|
| EMA | 3x3 | 0.3 | 0.95 | 36  | 108 | 0.726 |
| EMA | 3x3 | 0.3 | 0.95 | 39  | 117 | 0.756 |
| EMA | 3x3 | 0.3 | 0.95 | 48  | 144 | 0.857 |
| EMA | 3x3 | 0.3 | 0.95 | 54  | 162 | 0.874 |
| EMA | 3x3 | 0.3 | 0.95 | 60  | 180 | 0.908 |
| EMA | 3x3 | 0.3 | 0.95 | 66  | 198 | 0.936 |
| EMA | 3x3 | 0.3 | 0.95 | 75  | 225 | 0.966 |
| EMA | 3x3 | 0.3 | 0.95 | 81  | 243 | 0.962 |
| EMA | 3x3 | 0.3 | 0.95 | 90  | 270 | 0.979 |
| EMA | 3x3 | 0.3 | 0.95 | 96  | 288 | 0.987 |
| EMA | 3x3 | 0.3 | 0.95 | 105 | 315 | 0.995 |
| EMA | 3x3 | 0.3 | 1    | 9   | 27  | 0.018 |
| EMA | 3x3 | 0.3 | 1    | 12  | 36  | 0.089 |
| EMA | 3x3 | 0.3 | 1    | 15  | 45  | 0.206 |
| EMA | 3x3 | 0.3 | 1    | 18  | 54  | 0.321 |
| EMA | 3x3 | 0.3 | 1    | 21  | 63  | 0.43  |
| EMA | 3x3 | 0.3 | 1    | 24  | 72  | 0.507 |
| EMA | 3x3 | 0.3 | 1    | 27  | 81  | 0.628 |
| EMA | 3x3 | 0.3 | 1    | 30  | 90  | 0.689 |
| EMA | 3x3 | 0.3 | 1    | 39  | 117 | 0.785 |
| EMA | 3x3 | 0.3 | 1    | 48  | 144 | 0.912 |
| EMA | 3x3 | 0.3 | 1    | 54  | 162 | 0.926 |
| EMA | 3x3 | 0.3 | 1    | 60  | 180 | 0.966 |
| EMA | 3x3 | 0.3 | 1    | 66  | 198 | 0.977 |
| EMA | 3x3 | 0.3 | 1    | 75  | 225 | 0.989 |
| EMA | 3x3 | 0.3 | 1    | 81  | 243 | 0.994 |
| EMA | 3x3 | 0.3 | 1    | 90  | 270 | 0.995 |
| EMA | 3x3 | 0.3 | 1    | 96  | 288 | 0.998 |
| EMA | 3x3 | 0.3 | 1    | 105 | 315 | 0.997 |
| EMA | 3x3 | 0.3 | 1.05 | 9   | 27  | 0.028 |
| EMA | 3x3 | 0.3 | 1.05 | 12  | 36  | 0.068 |
| EMA | 3x3 | 0.3 | 1.05 | 15  | 45  | 0.175 |
| EMA | 3x3 | 0.3 | 1.05 | 18  | 54  | 0.298 |
| EMA | 3x3 | 0.3 | 1.05 | 21  | 63  | 0.363 |
| EMA | 3x3 | 0.3 | 1.05 | 24  | 72  | 0.481 |
| EMA | 3x3 | 0.3 | 1.05 | 27  | 81  | 0.534 |
| EMA | 3x3 | 0.3 | 1.05 | 33  | 99  | 0.683 |
| EMA | 3x3 | 0.3 | 1.05 | 36  | 108 | 0.687 |
| EMA | 3x3 | 0.3 | 1.05 | 39  | 117 | 0.715 |
| EMA | 3x3 | 0.3 | 1.05 | 48  | 144 | 0.803 |
| EMA | 3x3 | 0.3 | 1.05 | 54  | 162 | 0.867 |

|     |     |     |      |     |     |       |
|-----|-----|-----|------|-----|-----|-------|
| EMA | 3x3 | 0.3 | 1.05 | 60  | 180 | 0.892 |
| EMA | 3x3 | 0.3 | 1.05 | 66  | 198 | 0.923 |
| EMA | 3x3 | 0.3 | 1.05 | 75  | 225 | 0.942 |
| EMA | 3x3 | 0.3 | 1.05 | 81  | 243 | 0.958 |
| EMA | 3x3 | 0.3 | 1.05 | 90  | 270 | 0.974 |
| EMA | 3x3 | 0.3 | 1.05 | 96  | 288 | 0.977 |
| EMA | 3x3 | 0.3 | 1.05 | 105 | 315 | 0.986 |
| EMA | 3x3 | 0.3 | 1.1  | 9   | 27  | 0.015 |
| EMA | 3x3 | 0.3 | 1.1  | 15  | 45  | 0.148 |
| EMA | 3x3 | 0.3 | 1.1  | 24  | 72  | 0.373 |
| EMA | 3x3 | 0.3 | 1.1  | 33  | 99  | 0.501 |
| EMA | 3x3 | 0.3 | 1.1  | 39  | 117 | 0.559 |
| EMA | 3x3 | 0.3 | 1.1  | 45  | 135 | 0.616 |
| EMA | 3x3 | 0.3 | 1.1  | 51  | 153 | 0.66  |
| EMA | 3x3 | 0.3 | 1.1  | 51  | 153 | 0.623 |
| EMA | 3x3 | 0.3 | 1.1  | 63  | 189 | 0.726 |
| EMA | 3x3 | 0.3 | 1.1  | 66  | 198 | 0.742 |
| EMA | 3x3 | 0.3 | 1.1  | 48  | 144 | 0.616 |
| EMA | 3x3 | 0.3 | 1.1  | 54  | 162 | 0.654 |
| EMA | 3x3 | 0.3 | 1.1  | 60  | 180 | 0.715 |
| EMA | 3x3 | 0.3 | 1.1  | 66  | 198 | 0.743 |
| EMA | 3x3 | 0.3 | 1.1  | 75  | 225 | 0.781 |
| EMA | 3x3 | 0.3 | 1.1  | 81  | 243 | 0.815 |
| EMA | 3x3 | 0.3 | 1.1  | 90  | 270 | 0.842 |
| EMA | 3x3 | 0.3 | 1.1  | 96  | 288 | 0.876 |
| EMA | 3x3 | 0.3 | 1.1  | 105 | 315 | 0.894 |
| EMA | 3x3 | 0.4 | 0.9  | 9   | 27  | 0.004 |
| EMA | 3x3 | 0.4 | 0.9  | 15  | 45  | 0.048 |
| EMA | 3x3 | 0.4 | 0.9  | 24  | 72  | 0.248 |
| EMA | 3x3 | 0.4 | 0.9  | 33  | 99  | 0.416 |
| EMA | 3x3 | 0.4 | 0.9  | 39  | 117 | 0.443 |
| EMA | 3x3 | 0.4 | 0.9  | 42  | 126 | 0.482 |
| EMA | 3x3 | 0.4 | 0.9  | 45  | 135 | 0.53  |
| EMA | 3x3 | 0.4 | 0.9  | 51  | 153 | 0.526 |
| EMA | 3x3 | 0.4 | 0.9  | 54  | 162 | 0.593 |
| EMA | 3x3 | 0.4 | 0.9  | 63  | 189 | 0.623 |
| EMA | 3x3 | 0.4 | 0.9  | 72  | 216 | 0.702 |
| EMA | 3x3 | 0.4 | 0.9  | 81  | 243 | 0.734 |
| EMA | 3x3 | 0.4 | 0.9  | 90  | 270 | 0.765 |
| EMA | 3x3 | 0.4 | 0.9  | 96  | 288 | 0.773 |
| EMA | 3x3 | 0.4 | 0.9  | 105 | 315 | 0.816 |

|     |     |     |      |     |     |       |
|-----|-----|-----|------|-----|-----|-------|
| EMA | 3x3 | 0.4 | 0.95 | 9   | 27  | 0.004 |
| EMA | 3x3 | 0.4 | 0.95 | 15  | 45  | 0.048 |
| EMA | 3x3 | 0.4 | 0.95 | 24  | 72  | 0.31  |
| EMA | 3x3 | 0.4 | 0.95 | 27  | 81  | 0.393 |
| EMA | 3x3 | 0.4 | 0.95 | 30  | 90  | 0.479 |
| EMA | 3x3 | 0.4 | 0.95 | 36  | 108 | 0.603 |
| EMA | 3x3 | 0.4 | 0.95 | 39  | 117 | 0.639 |
| EMA | 3x3 | 0.4 | 0.95 | 42  | 126 | 0.664 |
| EMA | 3x3 | 0.4 | 0.95 | 45  | 135 | 0.729 |
| EMA | 3x3 | 0.4 | 0.95 | 51  | 153 | 0.767 |
| EMA | 3x3 | 0.4 | 0.95 | 54  | 162 | 0.795 |
| EMA | 3x3 | 0.4 | 0.95 | 63  | 189 | 0.847 |
| EMA | 3x3 | 0.4 | 0.95 | 72  | 216 | 0.886 |
| EMA | 3x3 | 0.4 | 0.95 | 81  | 243 | 0.919 |
| EMA | 3x3 | 0.4 | 0.95 | 90  | 270 | 0.944 |
| EMA | 3x3 | 0.4 | 0.95 | 96  | 288 | 0.965 |
| EMA | 3x3 | 0.4 | 0.95 | 105 | 315 | 0.972 |
| EMA | 3x3 | 0.4 | 1    | 9   | 27  | 0.007 |
| EMA | 3x3 | 0.4 | 1    | 15  | 45  | 0.055 |
| EMA | 3x3 | 0.4 | 1    | 24  | 72  | 0.364 |
| EMA | 3x3 | 0.4 | 1    | 27  | 81  | 0.431 |
| EMA | 3x3 | 0.4 | 1    | 33  | 99  | 0.586 |
| EMA | 3x3 | 0.4 | 1    | 39  | 117 | 0.714 |
| EMA | 3x3 | 0.4 | 1    | 42  | 126 | 0.756 |
| EMA | 3x3 | 0.4 | 1    | 45  | 135 | 0.793 |
| EMA | 3x3 | 0.4 | 1    | 51  | 153 | 0.825 |
| EMA | 3x3 | 0.4 | 1    | 54  | 162 | 0.877 |
| EMA | 3x3 | 0.4 | 1    | 63  | 189 | 0.929 |
| EMA | 3x3 | 0.4 | 1    | 72  | 216 | 0.961 |
| EMA | 3x3 | 0.4 | 1    | 81  | 243 | 0.979 |
| EMA | 3x3 | 0.4 | 1    | 90  | 270 | 0.989 |
| EMA | 3x3 | 0.4 | 1    | 96  | 288 | 0.992 |
| EMA | 3x3 | 0.4 | 1    | 105 | 315 | 0.996 |
| EMA | 3x3 | 0.4 | 1.05 | 9   | 27  | 0.002 |
| EMA | 3x3 | 0.4 | 1.05 | 15  | 45  | 0.07  |
| EMA | 3x3 | 0.4 | 1.05 | 24  | 72  | 0.314 |
| EMA | 3x3 | 0.4 | 1.05 | 27  | 81  | 0.399 |
| EMA | 3x3 | 0.4 | 1.05 | 30  | 90  | 0.455 |
| EMA | 3x3 | 0.4 | 1.05 | 36  | 108 | 0.61  |
| EMA | 3x3 | 0.4 | 1.05 | 39  | 117 | 0.666 |
| EMA | 3x3 | 0.4 | 1.05 | 42  | 126 | 0.663 |



|     |     |     |      |     |     |       |
|-----|-----|-----|------|-----|-----|-------|
| EMA | 3x3 | 0.4 | 1.05 | 45  | 135 | 0.692 |
| EMA | 3x3 | 0.4 | 1.05 | 51  | 153 | 0.784 |
| EMA | 3x3 | 0.4 | 1.05 | 54  | 162 | 0.799 |
| EMA | 3x3 | 0.4 | 1.05 | 63  | 189 | 0.844 |
| EMA | 3x3 | 0.4 | 1.05 | 72  | 216 | 0.899 |
| EMA | 3x3 | 0.4 | 1.05 | 81  | 243 | 0.926 |
| EMA | 3x3 | 0.4 | 1.05 | 90  | 270 | 0.957 |
| EMA | 3x3 | 0.4 | 1.05 | 96  | 288 | 0.953 |
| EMA | 3x3 | 0.4 | 1.05 | 105 | 315 | 0.975 |
| EMA | 3x3 | 0.4 | 1.1  | 9   | 27  | 0.003 |
| EMA | 3x3 | 0.4 | 1.1  | 15  | 45  | 0.064 |
| EMA | 3x3 | 0.4 | 1.1  | 24  | 72  | 0.255 |
| EMA | 3x3 | 0.4 | 1.1  | 33  | 99  | 0.432 |
| EMA | 3x3 | 0.4 | 1.1  | 39  | 117 | 0.498 |
| EMA | 3x3 | 0.4 | 1.1  | 42  | 126 | 0.529 |
| EMA | 3x3 | 0.4 | 1.1  | 48  | 144 | 0.58  |
| EMA | 3x3 | 0.4 | 1.1  | 54  | 162 | 0.636 |
| EMA | 3x3 | 0.4 | 1.1  | 57  | 171 | 0.66  |
| EMA | 3x3 | 0.4 | 1.1  | 63  | 189 | 0.667 |
| EMA | 3x3 | 0.4 | 1.1  | 72  | 216 | 0.731 |
| EMA | 3x3 | 0.4 | 1.1  | 81  | 243 | 0.801 |
| EMA | 3x3 | 0.4 | 1.1  | 90  | 270 | 0.812 |
| EMA | 3x3 | 0.4 | 1.1  | 96  | 288 | 0.835 |
| EMA | 3x3 | 0.4 | 1.1  | 105 | 315 | 0.86  |
| EMA | 3x3 | 0.5 | 0.9  | 9   | 27  | 0     |
| EMA | 3x3 | 0.5 | 0.9  | 15  | 45  | 0.013 |
| EMA | 3x3 | 0.5 | 0.9  | 24  | 72  | 0.136 |
| EMA | 3x3 | 0.5 | 0.9  | 33  | 99  | 0.287 |
| EMA | 3x3 | 0.5 | 0.9  | 39  | 117 | 0.376 |
| EMA | 3x3 | 0.5 | 0.9  | 42  | 126 | 0.376 |
| EMA | 3x3 | 0.5 | 0.9  | 48  | 144 | 0.423 |
| EMA | 3x3 | 0.5 | 0.9  | 54  | 162 | 0.477 |
| EMA | 3x3 | 0.5 | 0.9  | 57  | 171 | 0.484 |
| EMA | 3x3 | 0.5 | 0.9  | 63  | 189 | 0.573 |
| EMA | 3x3 | 0.5 | 0.9  | 72  | 216 | 0.578 |
| EMA | 3x3 | 0.5 | 0.9  | 81  | 243 | 0.626 |
| EMA | 3x3 | 0.5 | 0.9  | 90  | 270 | 0.667 |
| EMA | 3x3 | 0.5 | 0.9  | 96  | 288 | 0.696 |
| EMA | 3x3 | 0.5 | 0.9  | 105 | 315 | 0.724 |
| EMA | 3x3 | 0.5 | 0.95 | 9   | 27  | 0.003 |
| EMA | 3x3 | 0.5 | 0.95 | 15  | 45  | 0.019 |

|     |     |     |      |     |     |       |
|-----|-----|-----|------|-----|-----|-------|
| EMA | 3x3 | 0.5 | 0.95 | 24  | 72  | 0.146 |
| EMA | 3x3 | 0.5 | 0.95 | 30  | 90  | 0.294 |
| EMA | 3x3 | 0.5 | 0.95 | 36  | 108 | 0.451 |
| EMA | 3x3 | 0.5 | 0.95 | 39  | 117 | 0.464 |
| EMA | 3x3 | 0.5 | 0.95 | 42  | 126 | 0.531 |
| EMA | 3x3 | 0.5 | 0.95 | 48  | 144 | 0.571 |
| EMA | 3x3 | 0.5 | 0.95 | 54  | 162 | 0.663 |
| EMA | 3x3 | 0.5 | 0.95 | 57  | 171 | 0.698 |
| EMA | 3x3 | 0.5 | 0.95 | 63  | 189 | 0.745 |
| EMA | 3x3 | 0.5 | 0.95 | 72  | 216 | 0.792 |
| EMA | 3x3 | 0.5 | 0.95 | 81  | 243 | 0.821 |
| EMA | 3x3 | 0.5 | 0.95 | 90  | 270 | 0.897 |
| EMA | 3x3 | 0.5 | 0.95 | 96  | 288 | 0.904 |
| EMA | 3x3 | 0.5 | 0.95 | 105 | 315 | 0.923 |
| EMA | 3x3 | 0.5 | 1    | 9   | 27  | 0     |
| EMA | 3x3 | 0.5 | 1    | 15  | 45  | 0.018 |
| EMA | 3x3 | 0.5 | 1    | 24  | 72  | 0.169 |
| EMA | 3x3 | 0.5 | 1    | 27  | 81  | 0.25  |
| EMA | 3x3 | 0.5 | 1    | 33  | 99  | 0.423 |
| EMA | 3x3 | 0.5 | 1    | 36  | 108 | 0.465 |
| EMA | 3x3 | 0.5 | 1    | 39  | 117 | 0.521 |
| EMA | 3x3 | 0.5 | 1    | 42  | 126 | 0.595 |
| EMA | 3x3 | 0.5 | 1    | 48  | 144 | 0.681 |
| EMA | 3x3 | 0.5 | 1    | 54  | 162 | 0.753 |
| EMA | 3x3 | 0.5 | 1    | 57  | 171 | 0.8   |
| EMA | 3x3 | 0.5 | 1    | 63  | 189 | 0.822 |
| EMA | 3x3 | 0.5 | 1    | 72  | 216 | 0.895 |
| EMA | 3x3 | 0.5 | 1    | 81  | 243 | 0.917 |
| EMA | 3x3 | 0.5 | 1    | 90  | 270 | 0.956 |
| EMA | 3x3 | 0.5 | 1    | 96  | 288 | 0.965 |
| EMA | 3x3 | 0.5 | 1    | 105 | 315 | 0.964 |
| EMA | 3x3 | 0.5 | 1.05 | 9   | 27  | 0.001 |
| EMA | 3x3 | 0.5 | 1.05 | 15  | 45  | 0.014 |
| EMA | 3x3 | 0.5 | 1.05 | 24  | 72  | 0.186 |
| EMA | 3x3 | 0.5 | 1.05 | 30  | 90  | 0.322 |
| EMA | 3x3 | 0.5 | 1.05 | 33  | 99  | 0.357 |
| EMA | 3x3 | 0.5 | 1.05 | 39  | 117 | 0.469 |
| EMA | 3x3 | 0.5 | 1.05 | 42  | 126 | 0.537 |
| EMA | 3x3 | 0.5 | 1.05 | 48  | 144 | 0.63  |
| EMA | 3x3 | 0.5 | 1.05 | 54  | 162 | 0.672 |
| EMA | 3x3 | 0.5 | 1.05 | 57  | 171 | 0.731 |

|     |     |     |      |     |     |       |
|-----|-----|-----|------|-----|-----|-------|
| EMA | 3x3 | 0.5 | 1.05 | 63  | 189 | 0.751 |
| EMA | 3x3 | 0.5 | 1.05 | 72  | 216 | 0.815 |
| EMA | 3x3 | 0.5 | 1.05 | 81  | 243 | 0.864 |
| EMA | 3x3 | 0.5 | 1.05 | 90  | 270 | 0.881 |
| EMA | 3x3 | 0.5 | 1.05 | 96  | 288 | 0.926 |
| EMA | 3x3 | 0.5 | 1.05 | 105 | 315 | 0.922 |
| EMA | 3x3 | 0.5 | 1.1  | 9   | 27  | 0.003 |
| EMA | 3x3 | 0.5 | 1.1  | 15  | 45  | 0.017 |
| EMA | 3x3 | 0.5 | 1.1  | 24  | 72  | 0.139 |
| EMA | 3x3 | 0.5 | 1.1  | 30  | 90  | 0.253 |
| EMA | 3x3 | 0.5 | 1.1  | 39  | 117 | 0.384 |
| EMA | 3x3 | 0.5 | 1.1  | 45  | 135 | 0.443 |
| EMA | 3x3 | 0.5 | 1.1  | 48  | 144 | 0.508 |
| EMA | 3x3 | 0.5 | 1.1  | 51  | 153 | 0.495 |
| EMA | 3x3 | 0.5 | 1.1  | 54  | 162 | 0.545 |
| EMA | 3x3 | 0.5 | 1.1  | 57  | 171 | 0.558 |
| EMA | 3x3 | 0.5 | 1.1  | 63  | 189 | 0.619 |
| EMA | 3x3 | 0.5 | 1.1  | 72  | 216 | 0.639 |
| EMA | 3x3 | 0.5 | 1.1  | 81  | 243 | 0.694 |
| EMA | 3x3 | 0.5 | 1.1  | 90  | 270 | 0.717 |
| EMA | 3x3 | 0.5 | 1.1  | 96  | 288 | 0.744 |
| EMA | 3x3 | 0.5 | 1.1  | 105 | 315 | 0.768 |
| EMA | 3x3 | 0.6 | 0.9  | 9   | 27  | 0     |
| EMA | 3x3 | 0.6 | 0.9  | 15  | 45  | 0.002 |
| EMA | 3x3 | 0.6 | 0.9  | 18  | 54  | 0.009 |
| EMA | 3x3 | 0.6 | 0.9  | 24  | 72  | 0.05  |
| EMA | 3x3 | 0.6 | 0.9  | 30  | 90  | 0.125 |
| EMA | 3x3 | 0.6 | 0.9  | 36  | 108 | 0.216 |
| EMA | 3x3 | 0.6 | 0.9  | 42  | 126 | 0.276 |
| EMA | 3x3 | 0.6 | 0.9  | 48  | 144 | 0.329 |
| EMA | 3x3 | 0.6 | 0.9  | 54  | 162 | 0.399 |
| EMA | 3x3 | 0.6 | 0.9  | 60  | 180 | 0.414 |
| EMA | 3x3 | 0.6 | 0.9  | 66  | 198 | 0.473 |
| EMA | 3x3 | 0.6 | 0.9  | 72  | 216 | 0.448 |
| EMA | 3x3 | 0.6 | 0.9  | 81  | 243 | 0.555 |
| EMA | 3x3 | 0.6 | 0.9  | 90  | 270 | 0.556 |
| EMA | 3x3 | 0.6 | 0.9  | 96  | 288 | 0.616 |
| EMA | 3x3 | 0.6 | 0.9  | 105 | 315 | 0.638 |
| EMA | 3x3 | 0.6 | 0.95 | 9   | 27  | 0     |
| EMA | 3x3 | 0.6 | 0.95 | 15  | 45  | 0.004 |
| EMA | 3x3 | 0.6 | 0.95 | 18  | 54  | 0.011 |

|     |     |     |      |     |     |       |
|-----|-----|-----|------|-----|-----|-------|
| EMA | 3x3 | 0.6 | 0.95 | 24  | 72  | 0.053 |
| EMA | 3x3 | 0.6 | 0.95 | 30  | 90  | 0.175 |
| EMA | 3x3 | 0.6 | 0.95 | 36  | 108 | 0.27  |
| EMA | 3x3 | 0.6 | 0.95 | 39  | 117 | 0.325 |
| EMA | 3x3 | 0.6 | 0.95 | 45  | 135 | 0.445 |
| EMA | 3x3 | 0.6 | 0.95 | 48  | 144 | 0.49  |
| EMA | 3x3 | 0.6 | 0.95 | 54  | 162 | 0.532 |
| EMA | 3x3 | 0.6 | 0.95 | 60  | 180 | 0.597 |
| EMA | 3x3 | 0.6 | 0.95 | 66  | 198 | 0.669 |
| EMA | 3x3 | 0.6 | 0.95 | 72  | 216 | 0.683 |
| EMA | 3x3 | 0.6 | 0.95 | 81  | 243 | 0.765 |
| EMA | 3x3 | 0.6 | 0.95 | 90  | 270 | 0.766 |
| EMA | 3x3 | 0.6 | 0.95 | 96  | 288 | 0.808 |
| EMA | 3x3 | 0.6 | 0.95 | 105 | 315 | 0.858 |
| EMA | 3x3 | 0.6 | 1    | 9   | 27  | 0     |
| EMA | 3x3 | 0.6 | 1    | 15  | 45  | 0.003 |
| EMA | 3x3 | 0.6 | 1    | 18  | 54  | 0.02  |
| EMA | 3x3 | 0.6 | 1    | 24  | 72  | 0.059 |
| EMA | 3x3 | 0.6 | 1    | 30  | 90  | 0.148 |
| EMA | 3x3 | 0.6 | 1    | 33  | 99  | 0.233 |
| EMA | 3x3 | 0.6 | 1    | 36  | 108 | 0.3   |
| EMA | 3x3 | 0.6 | 1    | 42  | 126 | 0.41  |
| EMA | 3x3 | 0.6 | 1    | 48  | 144 | 0.496 |
| EMA | 3x3 | 0.6 | 1    | 54  | 162 | 0.584 |
| EMA | 3x3 | 0.6 | 1    | 60  | 180 | 0.659 |
| EMA | 3x3 | 0.6 | 1    | 66  | 198 | 0.72  |
| EMA | 3x3 | 0.6 | 1    | 72  | 216 | 0.786 |
| EMA | 3x3 | 0.6 | 1    | 81  | 243 | 0.824 |
| EMA | 3x3 | 0.6 | 1    | 90  | 270 | 0.879 |
| EMA | 3x3 | 0.6 | 1    | 96  | 288 | 0.881 |
| EMA | 3x3 | 0.6 | 1    | 105 | 315 | 0.906 |
| EMA | 3x3 | 0.6 | 1.05 | 9   | 27  | 0     |
| EMA | 3x3 | 0.6 | 1.05 | 15  | 45  | 0.002 |
| EMA | 3x3 | 0.6 | 1.05 | 18  | 54  | 0.013 |
| EMA | 3x3 | 0.6 | 1.05 | 24  | 72  | 0.072 |
| EMA | 3x3 | 0.6 | 1.05 | 30  | 90  | 0.182 |
| EMA | 3x3 | 0.6 | 1.05 | 33  | 99  | 0.228 |
| EMA | 3x3 | 0.6 | 1.05 | 36  | 108 | 0.277 |
| EMA | 3x3 | 0.6 | 1.05 | 42  | 126 | 0.37  |
| EMA | 3x3 | 0.6 | 1.05 | 48  | 144 | 0.477 |
| EMA | 3x3 | 0.6 | 1.05 | 54  | 162 | 0.563 |

|     |     |     |      |     |     |       |
|-----|-----|-----|------|-----|-----|-------|
| EMA | 3x3 | 0.6 | 1.05 | 60  | 180 | 0.62  |
| EMA | 3x3 | 0.6 | 1.05 | 66  | 198 | 0.664 |
| EMA | 3x3 | 0.6 | 1.05 | 72  | 216 | 0.714 |
| EMA | 3x3 | 0.6 | 1.05 | 81  | 243 | 0.77  |
| EMA | 3x3 | 0.6 | 1.05 | 90  | 270 | 0.817 |
| EMA | 3x3 | 0.6 | 1.05 | 96  | 288 | 0.826 |
| EMA | 3x3 | 0.6 | 1.05 | 105 | 315 | 0.877 |
| EMA | 3x3 | 0.6 | 1.1  | 9   | 27  | 0.001 |
| EMA | 3x3 | 0.6 | 1.1  | 15  | 45  | 0.003 |
| EMA | 3x3 | 0.6 | 1.1  | 24  | 72  | 0.038 |
| EMA | 3x3 | 0.6 | 1.1  | 30  | 90  | 0.16  |
| EMA | 3x3 | 0.6 | 1.1  | 39  | 117 | 0.295 |
| EMA | 3x3 | 0.6 | 1.1  | 42  | 126 | 0.298 |
| EMA | 3x3 | 0.6 | 1.1  | 45  | 135 | 0.349 |
| EMA | 3x3 | 0.6 | 1.1  | 54  | 162 | 0.418 |
| EMA | 3x3 | 0.6 | 1.1  | 60  | 180 | 0.487 |
| EMA | 3x3 | 0.6 | 1.1  | 66  | 198 | 0.528 |
| EMA | 3x3 | 0.6 | 1.1  | 72  | 216 | 0.565 |
| EMA | 3x3 | 0.6 | 1.1  | 81  | 243 | 0.6   |
| EMA | 3x3 | 0.6 | 1.1  | 90  | 270 | 0.637 |
| EMA | 3x3 | 0.6 | 1.1  | 96  | 288 | 0.647 |
| EMA | 3x3 | 0.6 | 1.1  | 105 | 315 | 0.709 |
| EMA | 2x4 | 0.2 | 0.9  | 6   | 24  | 0.083 |
| EMA | 2x4 | 0.2 | 0.9  | 8   | 32  | 0.146 |
| EMA | 2x4 | 0.2 | 0.9  | 12  | 48  | 0.343 |
| EMA | 2x4 | 0.2 | 0.9  | 14  | 56  | 0.385 |
| EMA | 2x4 | 0.2 | 0.9  | 16  | 64  | 0.434 |
| EMA | 2x4 | 0.2 | 0.9  | 18  | 72  | 0.506 |
| EMA | 2x4 | 0.2 | 0.9  | 20  | 80  | 0.546 |
| EMA | 2x4 | 0.2 | 0.9  | 24  | 96  | 0.579 |
| EMA | 2x4 | 0.2 | 0.9  | 30  | 120 | 0.679 |
| EMA | 2x4 | 0.2 | 0.9  | 34  | 136 | 0.693 |
| EMA | 2x4 | 0.2 | 0.9  | 40  | 160 | 0.78  |
| EMA | 2x4 | 0.2 | 0.9  | 46  | 184 | 0.811 |
| EMA | 2x4 | 0.2 | 0.9  | 50  | 200 | 0.85  |
| EMA | 2x4 | 0.2 | 0.9  | 54  | 216 | 0.892 |
| EMA | 2x4 | 0.2 | 0.9  | 60  | 240 | 0.9   |
| EMA | 2x4 | 0.2 | 0.9  | 66  | 264 | 0.918 |
| EMA | 2x4 | 0.2 | 0.9  | 72  | 288 | 0.937 |
| EMA | 2x4 | 0.2 | 0.9  | 80  | 320 | 0.964 |
| EMA | 2x4 | 0.2 | 0.95 | 6   | 24  | 0.097 |

|     |     |     |      |    |     |       |
|-----|-----|-----|------|----|-----|-------|
| EMA | 2x4 | 0.2 | 0.95 | 8  | 32  | 0.198 |
| EMA | 2x4 | 0.2 | 0.95 | 10 | 40  | 0.345 |
| EMA | 2x4 | 0.2 | 0.95 | 14 | 56  | 0.53  |
| EMA | 2x4 | 0.2 | 0.95 | 16 | 64  | 0.594 |
| EMA | 2x4 | 0.2 | 0.95 | 18 | 72  | 0.669 |
| EMA | 2x4 | 0.2 | 0.95 | 20 | 80  | 0.733 |
| EMA | 2x4 | 0.2 | 0.95 | 24 | 96  | 0.797 |
| EMA | 2x4 | 0.2 | 0.95 | 30 | 120 | 0.871 |
| EMA | 2x4 | 0.2 | 0.95 | 34 | 136 | 0.912 |
| EMA | 2x4 | 0.2 | 0.95 | 40 | 160 | 0.956 |
| EMA | 2x4 | 0.2 | 0.95 | 46 | 184 | 0.976 |
| EMA | 2x4 | 0.2 | 0.95 | 50 | 200 | 0.982 |
| EMA | 2x4 | 0.2 | 0.95 | 54 | 216 | 0.987 |
| EMA | 2x4 | 0.2 | 0.95 | 60 | 240 | 0.992 |
| EMA | 2x4 | 0.2 | 0.95 | 66 | 264 | 0.992 |
| EMA | 2x4 | 0.2 | 0.95 | 72 | 288 | 0.999 |
| EMA | 2x4 | 0.2 | 0.95 | 80 | 320 | 0.998 |
| EMA | 2x4 | 0.2 | 1    | 6  | 24  | 0.099 |
| EMA | 2x4 | 0.2 | 1    | 8  | 32  | 0.215 |
| EMA | 2x4 | 0.2 | 1    | 10 | 40  | 0.347 |
| EMA | 2x4 | 0.2 | 1    | 14 | 56  | 0.56  |
| EMA | 2x4 | 0.2 | 1    | 18 | 72  | 0.713 |
| EMA | 2x4 | 0.2 | 1    | 20 | 80  | 0.788 |
| EMA | 2x4 | 0.2 | 1    | 24 | 96  | 0.869 |
| EMA | 2x4 | 0.2 | 1    | 30 | 120 | 0.931 |
| EMA | 2x4 | 0.2 | 1    | 34 | 136 | 0.956 |
| EMA | 2x4 | 0.2 | 1    | 40 | 160 | 0.984 |
| EMA | 2x4 | 0.2 | 1    | 46 | 184 | 0.995 |
| EMA | 2x4 | 0.2 | 1    | 50 | 200 | 0.995 |
| EMA | 2x4 | 0.2 | 1    | 54 | 216 | 0.995 |
| EMA | 2x4 | 0.2 | 1    | 60 | 240 | 1     |
| EMA | 2x4 | 0.2 | 1    | 66 | 264 | 1     |
| EMA | 2x4 | 0.2 | 1    | 72 | 288 | 0.999 |
| EMA | 2x4 | 0.2 | 1    | 80 | 320 | 1     |
| EMA | 2x4 | 0.2 | 1.05 | 6  | 24  | 0.09  |
| EMA | 2x4 | 0.2 | 1.05 | 8  | 32  | 0.213 |
| EMA | 2x4 | 0.2 | 1.05 | 12 | 48  | 0.44  |
| EMA | 2x4 | 0.2 | 1.05 | 14 | 56  | 0.491 |
| EMA | 2x4 | 0.2 | 1.05 | 16 | 64  | 0.578 |
| EMA | 2x4 | 0.2 | 1.05 | 18 | 72  | 0.621 |
| EMA | 2x4 | 0.2 | 1.05 | 20 | 80  | 0.698 |

|     |     |     |      |    |     |       |
|-----|-----|-----|------|----|-----|-------|
| EMA | 2x4 | 0.2 | 1.05 | 24 | 96  | 0.768 |
| EMA | 2x4 | 0.2 | 1.05 | 30 | 120 | 0.865 |
| EMA | 2x4 | 0.2 | 1.05 | 34 | 136 | 0.875 |
| EMA | 2x4 | 0.2 | 1.05 | 40 | 160 | 0.918 |
| EMA | 2x4 | 0.2 | 1.05 | 46 | 184 | 0.951 |
| EMA | 2x4 | 0.2 | 1.05 | 50 | 200 | 0.969 |
| EMA | 2x4 | 0.2 | 1.05 | 54 | 216 | 0.964 |
| EMA | 2x4 | 0.2 | 1.05 | 60 | 240 | 0.978 |
| EMA | 2x4 | 0.2 | 1.05 | 66 | 264 | 0.985 |
| EMA | 2x4 | 0.2 | 1.05 | 72 | 288 | 0.988 |
| EMA | 2x4 | 0.2 | 1.05 | 80 | 320 | 0.997 |
| EMA | 2x4 | 0.2 | 1.1  | 6  | 24  | 0.087 |
| EMA | 2x4 | 0.2 | 1.1  | 8  | 32  | 0.199 |
| EMA | 2x4 | 0.2 | 1.1  | 10 | 40  | 0.299 |
| EMA | 2x4 | 0.2 | 1.1  | 14 | 56  | 0.394 |
| EMA | 2x4 | 0.2 | 1.1  | 16 | 64  | 0.428 |
| EMA | 2x4 | 0.2 | 1.1  | 18 | 72  | 0.51  |
| EMA | 2x4 | 0.2 | 1.1  | 20 | 80  | 0.508 |
| EMA | 2x4 | 0.2 | 1.1  | 22 | 88  | 0.587 |
| EMA | 2x4 | 0.2 | 1.1  | 30 | 120 | 0.682 |
| EMA | 2x4 | 0.2 | 1.1  | 34 | 136 | 0.7   |
| EMA | 2x4 | 0.2 | 1.1  | 40 | 160 | 0.787 |
| EMA | 2x4 | 0.2 | 1.1  | 46 | 184 | 0.832 |
| EMA | 2x4 | 0.2 | 1.1  | 50 | 200 | 0.841 |
| EMA | 2x4 | 0.2 | 1.1  | 54 | 216 | 0.854 |
| EMA | 2x4 | 0.2 | 1.1  | 60 | 240 | 0.882 |
| EMA | 2x4 | 0.2 | 1.1  | 66 | 264 | 0.924 |
| EMA | 2x4 | 0.2 | 1.1  | 72 | 288 | 0.918 |
| EMA | 2x4 | 0.2 | 1.1  | 80 | 320 | 0.941 |
| EMA | 2x4 | 0.3 | 0.9  | 6  | 24  | 0.03  |
| EMA | 2x4 | 0.3 | 0.9  | 12 | 48  | 0.188 |
| EMA | 2x4 | 0.3 | 0.9  | 18 | 72  | 0.354 |
| EMA | 2x4 | 0.3 | 0.9  | 24 | 96  | 0.492 |
| EMA | 2x4 | 0.3 | 0.9  | 30 | 120 | 0.598 |
| EMA | 2x4 | 0.3 | 0.9  | 36 | 144 | 0.633 |
| EMA | 2x4 | 0.3 | 0.9  | 40 | 160 | 0.671 |
| EMA | 2x4 | 0.3 | 0.9  | 44 | 176 | 0.696 |
| EMA | 2x4 | 0.3 | 0.9  | 50 | 200 | 0.743 |
| EMA | 2x4 | 0.3 | 0.9  | 54 | 216 | 0.775 |
| EMA | 2x4 | 0.3 | 0.9  | 60 | 240 | 0.812 |
| EMA | 2x4 | 0.3 | 0.9  | 66 | 264 | 0.846 |

|     |     |     |      |    |     |       |
|-----|-----|-----|------|----|-----|-------|
| EMA | 2x4 | 0.3 | 0.9  | 72 | 288 | 0.887 |
| EMA | 2x4 | 0.3 | 0.9  | 80 | 320 | 0.908 |
| EMA | 2x4 | 0.3 | 0.95 | 6  | 24  | 0.03  |
| EMA | 2x4 | 0.3 | 0.95 | 8  | 32  | 0.072 |
| EMA | 2x4 | 0.3 | 0.95 | 12 | 48  | 0.276 |
| EMA | 2x4 | 0.3 | 0.95 | 14 | 56  | 0.342 |
| EMA | 2x4 | 0.3 | 0.95 | 16 | 64  | 0.431 |
| EMA | 2x4 | 0.3 | 0.95 | 18 | 72  | 0.475 |
| EMA | 2x4 | 0.3 | 0.95 | 20 | 80  | 0.58  |
| EMA | 2x4 | 0.3 | 0.95 | 26 | 104 | 0.724 |
| EMA | 2x4 | 0.3 | 0.95 | 30 | 120 | 0.786 |
| EMA | 2x4 | 0.3 | 0.95 | 36 | 144 | 0.866 |
| EMA | 2x4 | 0.3 | 0.95 | 40 | 160 | 0.875 |
| EMA | 2x4 | 0.3 | 0.95 | 44 | 176 | 0.911 |
| EMA | 2x4 | 0.3 | 0.95 | 50 | 200 | 0.937 |
| EMA | 2x4 | 0.3 | 0.95 | 54 | 216 | 0.954 |
| EMA | 2x4 | 0.3 | 0.95 | 60 | 240 | 0.979 |
| EMA | 2x4 | 0.3 | 0.95 | 66 | 264 | 0.978 |
| EMA | 2x4 | 0.3 | 0.95 | 72 | 288 | 0.982 |
| EMA | 2x4 | 0.3 | 0.95 | 80 | 320 | 0.984 |
| EMA | 2x4 | 0.3 | 1    | 6  | 24  | 0.024 |
| EMA | 2x4 | 0.3 | 1    | 8  | 32  | 0.081 |
| EMA | 2x4 | 0.3 | 1    | 12 | 48  | 0.263 |
| EMA | 2x4 | 0.3 | 1    | 14 | 56  | 0.402 |
| EMA | 2x4 | 0.3 | 1    | 16 | 64  | 0.473 |
| EMA | 2x4 | 0.3 | 1    | 18 | 72  | 0.554 |
| EMA | 2x4 | 0.3 | 1    | 20 | 80  | 0.64  |
| EMA | 2x4 | 0.3 | 1    | 22 | 88  | 0.684 |
| EMA | 2x4 | 0.3 | 1    | 30 | 120 | 0.833 |
| EMA | 2x4 | 0.3 | 1    | 36 | 144 | 0.902 |
| EMA | 2x4 | 0.3 | 1    | 40 | 160 | 0.939 |
| EMA | 2x4 | 0.3 | 1    | 44 | 176 | 0.964 |
| EMA | 2x4 | 0.3 | 1    | 50 | 200 | 0.977 |
| EMA | 2x4 | 0.3 | 1    | 54 | 216 | 0.988 |
| EMA | 2x4 | 0.3 | 1    | 60 | 240 | 0.987 |
| EMA | 2x4 | 0.3 | 1    | 66 | 264 | 0.999 |
| EMA | 2x4 | 0.3 | 1    | 72 | 288 | 0.998 |
| EMA | 2x4 | 0.3 | 1    | 80 | 320 | 0.999 |
| EMA | 2x4 | 0.3 | 1.05 | 6  | 24  | 0.023 |
| EMA | 2x4 | 0.3 | 1.05 | 8  | 32  | 0.066 |
| EMA | 2x4 | 0.3 | 1.05 | 12 | 48  | 0.256 |



|     |     |     |      |    |     |       |
|-----|-----|-----|------|----|-----|-------|
| EMA | 2x4 | 0.3 | 1.05 | 14 | 56  | 0.368 |
| EMA | 2x4 | 0.3 | 1.05 | 16 | 64  | 0.429 |
| EMA | 2x4 | 0.3 | 1.05 | 18 | 72  | 0.497 |
| EMA | 2x4 | 0.3 | 1.05 | 20 | 80  | 0.54  |
| EMA | 2x4 | 0.3 | 1.05 | 24 | 96  | 0.669 |
| EMA | 2x4 | 0.3 | 1.05 | 26 | 104 | 0.725 |
| EMA | 2x4 | 0.3 | 1.05 | 30 | 120 | 0.776 |
| EMA | 2x4 | 0.3 | 1.05 | 36 | 144 | 0.831 |
| EMA | 2x4 | 0.3 | 1.05 | 40 | 160 | 0.853 |
| EMA | 2x4 | 0.3 | 1.05 | 44 | 176 | 0.89  |
| EMA | 2x4 | 0.3 | 1.05 | 50 | 200 | 0.926 |
| EMA | 2x4 | 0.3 | 1.05 | 54 | 216 | 0.924 |
| EMA | 2x4 | 0.3 | 1.05 | 60 | 240 | 0.948 |
| EMA | 2x4 | 0.3 | 1.05 | 66 | 264 | 0.97  |
| EMA | 2x4 | 0.3 | 1.05 | 72 | 288 | 0.975 |
| EMA | 2x4 | 0.3 | 1.05 | 80 | 320 | 0.984 |
| EMA | 2x4 | 0.3 | 1.1  | 6  | 24  | 0.023 |
| EMA | 2x4 | 0.3 | 1.1  | 12 | 48  | 0.211 |
| EMA | 2x4 | 0.3 | 1.1  | 18 | 72  | 0.392 |
| EMA | 2x4 | 0.3 | 1.1  | 24 | 96  | 0.488 |
| EMA | 2x4 | 0.3 | 1.1  | 30 | 120 | 0.607 |
| EMA | 2x4 | 0.3 | 1.1  | 34 | 136 | 0.626 |
| EMA | 2x4 | 0.3 | 1.1  | 38 | 152 | 0.669 |
| EMA | 2x4 | 0.3 | 1.1  | 42 | 168 | 0.715 |
| EMA | 2x4 | 0.3 | 1.1  | 46 | 184 | 0.747 |
| EMA | 2x4 | 0.3 | 1.1  | 50 | 200 | 0.768 |
| EMA | 2x4 | 0.3 | 1.1  | 36 | 144 | 0.654 |
| EMA | 2x4 | 0.3 | 1.1  | 40 | 160 | 0.675 |
| EMA | 2x4 | 0.3 | 1.1  | 44 | 176 | 0.734 |
| EMA | 2x4 | 0.3 | 1.1  | 50 | 200 | 0.738 |
| EMA | 2x4 | 0.3 | 1.1  | 54 | 216 | 0.781 |
| EMA | 2x4 | 0.3 | 1.1  | 60 | 240 | 0.814 |
| EMA | 2x4 | 0.3 | 1.1  | 66 | 264 | 0.851 |
| EMA | 2x4 | 0.3 | 1.1  | 72 | 288 | 0.86  |
| EMA | 2x4 | 0.3 | 1.1  | 80 | 320 | 0.914 |
| EMA | 2x4 | 0.4 | 0.9  | 6  | 24  | 0.007 |
| EMA | 2x4 | 0.4 | 0.9  | 12 | 48  | 0.08  |
| EMA | 2x4 | 0.4 | 0.9  | 18 | 72  | 0.3   |
| EMA | 2x4 | 0.4 | 0.9  | 24 | 96  | 0.379 |
| EMA | 2x4 | 0.4 | 0.9  | 28 | 112 | 0.48  |
| EMA | 2x4 | 0.4 | 0.9  | 32 | 128 | 0.519 |

|     |     |     |      |    |     |       |
|-----|-----|-----|------|----|-----|-------|
| EMA | 2x4 | 0.4 | 0.9  | 34 | 136 | 0.54  |
| EMA | 2x4 | 0.4 | 0.9  | 38 | 152 | 0.588 |
| EMA | 2x4 | 0.4 | 0.9  | 42 | 168 | 0.597 |
| EMA | 2x4 | 0.4 | 0.9  | 48 | 192 | 0.669 |
| EMA | 2x4 | 0.4 | 0.9  | 54 | 216 | 0.735 |
| EMA | 2x4 | 0.4 | 0.9  | 60 | 240 | 0.746 |
| EMA | 2x4 | 0.4 | 0.9  | 66 | 264 | 0.77  |
| EMA | 2x4 | 0.4 | 0.9  | 72 | 288 | 0.809 |
| EMA | 2x4 | 0.4 | 0.9  | 80 | 320 | 0.829 |
| EMA | 2x4 | 0.4 | 0.95 | 6  | 24  | 0.003 |
| EMA | 2x4 | 0.4 | 0.95 | 12 | 48  | 0.116 |
| EMA | 2x4 | 0.4 | 0.95 | 18 | 72  | 0.375 |
| EMA | 2x4 | 0.4 | 0.95 | 20 | 80  | 0.445 |
| EMA | 2x4 | 0.4 | 0.95 | 22 | 88  | 0.491 |
| EMA | 2x4 | 0.4 | 0.95 | 26 | 104 | 0.581 |
| EMA | 2x4 | 0.4 | 0.95 | 28 | 112 | 0.657 |
| EMA | 2x4 | 0.4 | 0.95 | 32 | 128 | 0.708 |
| EMA | 2x4 | 0.4 | 0.95 | 34 | 136 | 0.717 |
| EMA | 2x4 | 0.4 | 0.95 | 38 | 152 | 0.783 |
| EMA | 2x4 | 0.4 | 0.95 | 42 | 168 | 0.826 |
| EMA | 2x4 | 0.4 | 0.95 | 48 | 192 | 0.894 |
| EMA | 2x4 | 0.4 | 0.95 | 54 | 216 | 0.915 |
| EMA | 2x4 | 0.4 | 0.95 | 60 | 240 | 0.933 |
| EMA | 2x4 | 0.4 | 0.95 | 66 | 264 | 0.951 |
| EMA | 2x4 | 0.4 | 0.95 | 72 | 288 | 0.969 |
| EMA | 2x4 | 0.4 | 0.95 | 80 | 320 | 0.972 |
| EMA | 2x4 | 0.4 | 1    | 6  | 24  | 0.002 |
| EMA | 2x4 | 0.4 | 1    | 12 | 48  | 0.141 |
| EMA | 2x4 | 0.4 | 1    | 18 | 72  | 0.403 |
| EMA | 2x4 | 0.4 | 1    | 20 | 80  | 0.483 |
| EMA | 2x4 | 0.4 | 1    | 24 | 96  | 0.613 |
| EMA | 2x4 | 0.4 | 1    | 28 | 112 | 0.694 |
| EMA | 2x4 | 0.4 | 1    | 32 | 128 | 0.78  |
| EMA | 2x4 | 0.4 | 1    | 34 | 136 | 0.82  |
| EMA | 2x4 | 0.4 | 1    | 38 | 152 | 0.858 |
| EMA | 2x4 | 0.4 | 1    | 42 | 168 | 0.888 |
| EMA | 2x4 | 0.4 | 1    | 48 | 192 | 0.943 |
| EMA | 2x4 | 0.4 | 1    | 54 | 216 | 0.966 |
| EMA | 2x4 | 0.4 | 1    | 60 | 240 | 0.981 |
| EMA | 2x4 | 0.4 | 1    | 66 | 264 | 0.988 |
| EMA | 2x4 | 0.4 | 1    | 72 | 288 | 0.993 |

|     |     |     |      |    |     |       |
|-----|-----|-----|------|----|-----|-------|
| EMA | 2x4 | 0.4 | 1    | 80 | 320 | 0.996 |
| EMA | 2x4 | 0.4 | 1.05 | 6  | 24  | 0.004 |
| EMA | 2x4 | 0.4 | 1.05 | 12 | 48  | 0.124 |
| EMA | 2x4 | 0.4 | 1.05 | 18 | 72  | 0.387 |
| EMA | 2x4 | 0.4 | 1.05 | 20 | 80  | 0.423 |
| EMA | 2x4 | 0.4 | 1.05 | 22 | 88  | 0.468 |
| EMA | 2x4 | 0.4 | 1.05 | 26 | 104 | 0.639 |
| EMA | 2x4 | 0.4 | 1.05 | 30 | 120 | 0.668 |
| EMA | 2x4 | 0.4 | 1.05 | 32 | 128 | 0.75  |
| EMA | 2x4 | 0.4 | 1.05 | 34 | 136 | 0.763 |
| EMA | 2x4 | 0.4 | 1.05 | 38 | 152 | 0.809 |
| EMA | 2x4 | 0.4 | 1.05 | 42 | 168 | 0.856 |
| EMA | 2x4 | 0.4 | 1.05 | 48 | 192 | 0.89  |
| EMA | 2x4 | 0.4 | 1.05 | 54 | 216 | 0.915 |
| EMA | 2x4 | 0.4 | 1.05 | 60 | 240 | 0.95  |
| EMA | 2x4 | 0.4 | 1.05 | 66 | 264 | 0.946 |
| EMA | 2x4 | 0.4 | 1.05 | 72 | 288 | 0.967 |
| EMA | 2x4 | 0.4 | 1.05 | 80 | 320 | 0.976 |
| EMA | 2x4 | 0.4 | 1.1  | 6  | 24  | 0.004 |
| EMA | 2x4 | 0.4 | 1.1  | 12 | 48  | 0.09  |
| EMA | 2x4 | 0.4 | 1.1  | 18 | 72  | 0.288 |
| EMA | 2x4 | 0.4 | 1.1  | 24 | 96  | 0.442 |
| EMA | 2x4 | 0.4 | 1.1  | 28 | 112 | 0.489 |
| EMA | 2x4 | 0.4 | 1.1  | 32 | 128 | 0.552 |
| EMA | 2x4 | 0.4 | 1.1  | 36 | 144 | 0.625 |
| EMA | 2x4 | 0.4 | 1.1  | 40 | 160 | 0.671 |
| EMA | 2x4 | 0.4 | 1.1  | 44 | 176 | 0.684 |
| EMA | 2x4 | 0.4 | 1.1  | 48 | 192 | 0.744 |
| EMA | 2x4 | 0.4 | 1.1  | 54 | 216 | 0.78  |
| EMA | 2x4 | 0.4 | 1.1  | 60 | 240 | 0.815 |
| EMA | 2x4 | 0.4 | 1.1  | 66 | 264 | 0.859 |
| EMA | 2x4 | 0.4 | 1.1  | 72 | 288 | 0.844 |
| EMA | 2x4 | 0.4 | 1.1  | 80 | 320 | 0.888 |
| EMA | 2x4 | 0.5 | 0.9  | 6  | 24  | 0.002 |
| EMA | 2x4 | 0.5 | 0.9  | 12 | 48  | 0.027 |
| EMA | 2x4 | 0.5 | 0.9  | 18 | 72  | 0.198 |
| EMA | 2x4 | 0.5 | 0.9  | 24 | 96  | 0.309 |
| EMA | 2x4 | 0.5 | 0.9  | 28 | 112 | 0.386 |
| EMA | 2x4 | 0.5 | 0.9  | 32 | 128 | 0.388 |
| EMA | 2x4 | 0.5 | 0.9  | 36 | 144 | 0.464 |
| EMA | 2x4 | 0.5 | 0.9  | 40 | 160 | 0.52  |

|     |     |     |      |    |     |       |
|-----|-----|-----|------|----|-----|-------|
| EMA | 2x4 | 0.5 | 0.9  | 44 | 176 | 0.542 |
| EMA | 2x4 | 0.5 | 0.9  | 48 | 192 | 0.6   |
| EMA | 2x4 | 0.5 | 0.9  | 54 | 216 | 0.62  |
| EMA | 2x4 | 0.5 | 0.9  | 60 | 240 | 0.67  |
| EMA | 2x4 | 0.5 | 0.9  | 66 | 264 | 0.693 |
| EMA | 2x4 | 0.5 | 0.9  | 72 | 288 | 0.736 |
| EMA | 2x4 | 0.5 | 0.9  | 80 | 320 | 0.774 |
| EMA | 2x4 | 0.5 | 0.95 | 6  | 24  | 0.002 |
| EMA | 2x4 | 0.5 | 0.95 | 12 | 48  | 0.036 |
| EMA | 2x4 | 0.5 | 0.95 | 18 | 72  | 0.252 |
| EMA | 2x4 | 0.5 | 0.95 | 22 | 88  | 0.371 |
| EMA | 2x4 | 0.5 | 0.95 | 26 | 104 | 0.449 |
| EMA | 2x4 | 0.5 | 0.95 | 28 | 112 | 0.509 |
| EMA | 2x4 | 0.5 | 0.95 | 32 | 128 | 0.581 |
| EMA | 2x4 | 0.5 | 0.95 | 36 | 144 | 0.644 |
| EMA | 2x4 | 0.5 | 0.95 | 40 | 160 | 0.69  |
| EMA | 2x4 | 0.5 | 0.95 | 44 | 176 | 0.744 |
| EMA | 2x4 | 0.5 | 0.95 | 48 | 192 | 0.777 |
| EMA | 2x4 | 0.5 | 0.95 | 54 | 216 | 0.812 |
| EMA | 2x4 | 0.5 | 0.95 | 60 | 240 | 0.857 |
| EMA | 2x4 | 0.5 | 0.95 | 66 | 264 | 0.893 |
| EMA | 2x4 | 0.5 | 0.95 | 72 | 288 | 0.895 |
| EMA | 2x4 | 0.5 | 0.95 | 80 | 320 | 0.947 |
| EMA | 2x4 | 0.5 | 1    | 6  | 24  | 0.005 |
| EMA | 2x4 | 0.5 | 1    | 12 | 48  | 0.037 |
| EMA | 2x4 | 0.5 | 1    | 18 | 72  | 0.249 |
| EMA | 2x4 | 0.5 | 1    | 20 | 80  | 0.308 |
| EMA | 2x4 | 0.5 | 1    | 24 | 96  | 0.453 |
| EMA | 2x4 | 0.5 | 1    | 26 | 104 | 0.459 |
| EMA | 2x4 | 0.5 | 1    | 28 | 112 | 0.543 |
| EMA | 2x4 | 0.5 | 1    | 32 | 128 | 0.649 |
| EMA | 2x4 | 0.5 | 1    | 36 | 144 | 0.709 |
| EMA | 2x4 | 0.5 | 1    | 40 | 160 | 0.777 |
| EMA | 2x4 | 0.5 | 1    | 44 | 176 | 0.832 |
| EMA | 2x4 | 0.5 | 1    | 48 | 192 | 0.847 |
| EMA | 2x4 | 0.5 | 1    | 54 | 216 | 0.89  |
| EMA | 2x4 | 0.5 | 1    | 60 | 240 | 0.935 |
| EMA | 2x4 | 0.5 | 1    | 66 | 264 | 0.935 |
| EMA | 2x4 | 0.5 | 1    | 72 | 288 | 0.967 |
| EMA | 2x4 | 0.5 | 1    | 80 | 320 | 0.979 |
| EMA | 2x4 | 0.5 | 1.05 | 6  | 24  | 0.001 |

|     |     |     |      |    |     |       |
|-----|-----|-----|------|----|-----|-------|
| EMA | 2x4 | 0.5 | 1.05 | 12 | 48  | 0.051 |
| EMA | 2x4 | 0.5 | 1.05 | 18 | 72  | 0.223 |
| EMA | 2x4 | 0.5 | 1.05 | 22 | 88  | 0.361 |
| EMA | 2x4 | 0.5 | 1.05 | 24 | 96  | 0.389 |
| EMA | 2x4 | 0.5 | 1.05 | 28 | 112 | 0.52  |
| EMA | 2x4 | 0.5 | 1.05 | 32 | 128 | 0.603 |
| EMA | 2x4 | 0.5 | 1.05 | 36 | 144 | 0.633 |
| EMA | 2x4 | 0.5 | 1.05 | 40 | 160 | 0.713 |
| EMA | 2x4 | 0.5 | 1.05 | 44 | 176 | 0.775 |
| EMA | 2x4 | 0.5 | 1.05 | 48 | 192 | 0.803 |
| EMA | 2x4 | 0.5 | 1.05 | 54 | 216 | 0.833 |
| EMA | 2x4 | 0.5 | 1.05 | 60 | 240 | 0.899 |
| EMA | 2x4 | 0.5 | 1.05 | 66 | 264 | 0.907 |
| EMA | 2x4 | 0.5 | 1.05 | 72 | 288 | 0.923 |
| EMA | 2x4 | 0.5 | 1.05 | 80 | 320 | 0.949 |
| EMA | 2x4 | 0.5 | 1.1  | 6  | 24  | 0.001 |
| EMA | 2x4 | 0.5 | 1.1  | 12 | 48  | 0.033 |
| EMA | 2x4 | 0.5 | 1.1  | 18 | 72  | 0.199 |
| EMA | 2x4 | 0.5 | 1.1  | 22 | 88  | 0.309 |
| EMA | 2x4 | 0.5 | 1.1  | 28 | 112 | 0.418 |
| EMA | 2x4 | 0.5 | 1.1  | 34 | 136 | 0.494 |
| EMA | 2x4 | 0.5 | 1.1  | 36 | 144 | 0.525 |
| EMA | 2x4 | 0.5 | 1.1  | 38 | 152 | 0.541 |
| EMA | 2x4 | 0.5 | 1.1  | 40 | 160 | 0.585 |
| EMA | 2x4 | 0.5 | 1.1  | 44 | 176 | 0.599 |
| EMA | 2x4 | 0.5 | 1.1  | 48 | 192 | 0.65  |
| EMA | 2x4 | 0.5 | 1.1  | 54 | 216 | 0.71  |
| EMA | 2x4 | 0.5 | 1.1  | 60 | 240 | 0.726 |
| EMA | 2x4 | 0.5 | 1.1  | 66 | 264 | 0.774 |
| EMA | 2x4 | 0.5 | 1.1  | 72 | 288 | 0.78  |
| EMA | 2x4 | 0.5 | 1.1  | 80 | 320 | 0.822 |
| EMA | 2x4 | 0.6 | 0.9  | 6  | 24  | 0     |
| EMA | 2x4 | 0.6 | 0.9  | 10 | 40  | 0.004 |
| EMA | 2x4 | 0.6 | 0.9  | 14 | 56  | 0.018 |
| EMA | 2x4 | 0.6 | 0.9  | 18 | 72  | 0.079 |
| EMA | 2x4 | 0.6 | 0.9  | 22 | 88  | 0.159 |
| EMA | 2x4 | 0.6 | 0.9  | 26 | 104 | 0.26  |
| EMA | 2x4 | 0.6 | 0.9  | 32 | 128 | 0.34  |
| EMA | 2x4 | 0.6 | 0.9  | 36 | 144 | 0.405 |
| EMA | 2x4 | 0.6 | 0.9  | 40 | 160 | 0.417 |
| EMA | 2x4 | 0.6 | 0.9  | 46 | 184 | 0.468 |

|     |     |     |      |    |     |       |
|-----|-----|-----|------|----|-----|-------|
| EMA | 2x4 | 0.6 | 0.9  | 50 | 200 | 0.505 |
| EMA | 2x4 | 0.6 | 0.9  | 54 | 216 | 0.538 |
| EMA | 2x4 | 0.6 | 0.9  | 60 | 240 | 0.544 |
| EMA | 2x4 | 0.6 | 0.9  | 66 | 264 | 0.6   |
| EMA | 2x4 | 0.6 | 0.9  | 72 | 288 | 0.659 |
| EMA | 2x4 | 0.6 | 0.9  | 80 | 320 | 0.676 |
| EMA | 2x4 | 0.6 | 0.95 | 6  | 24  | 0     |
| EMA | 2x4 | 0.6 | 0.95 | 10 | 40  | 0.005 |
| EMA | 2x4 | 0.6 | 0.95 | 14 | 56  | 0.019 |
| EMA | 2x4 | 0.6 | 0.95 | 18 | 72  | 0.103 |
| EMA | 2x4 | 0.6 | 0.95 | 22 | 88  | 0.209 |
| EMA | 2x4 | 0.6 | 0.95 | 26 | 104 | 0.331 |
| EMA | 2x4 | 0.6 | 0.95 | 30 | 120 | 0.383 |
| EMA | 2x4 | 0.6 | 0.95 | 32 | 128 | 0.434 |
| EMA | 2x4 | 0.6 | 0.95 | 36 | 144 | 0.528 |
| EMA | 2x4 | 0.6 | 0.95 | 40 | 160 | 0.573 |
| EMA | 2x4 | 0.6 | 0.95 | 46 | 184 | 0.663 |
| EMA | 2x4 | 0.6 | 0.95 | 50 | 200 | 0.711 |
| EMA | 2x4 | 0.6 | 0.95 | 54 | 216 | 0.74  |
| EMA | 2x4 | 0.6 | 0.95 | 60 | 240 | 0.793 |
| EMA | 2x4 | 0.6 | 0.95 | 66 | 264 | 0.822 |
| EMA | 2x4 | 0.6 | 0.95 | 72 | 288 | 0.841 |
| EMA | 2x4 | 0.6 | 0.95 | 80 | 320 | 0.896 |
| EMA | 2x4 | 0.6 | 1    | 6  | 24  | 0     |
| EMA | 2x4 | 0.6 | 1    | 10 | 40  | 0.003 |
| EMA | 2x4 | 0.6 | 1    | 14 | 56  | 0.026 |
| EMA | 2x4 | 0.6 | 1    | 18 | 72  | 0.1   |
| EMA | 2x4 | 0.6 | 1    | 22 | 88  | 0.253 |
| EMA | 2x4 | 0.6 | 1    | 24 | 96  | 0.284 |
| EMA | 2x4 | 0.6 | 1    | 26 | 104 | 0.337 |
| EMA | 2x4 | 0.6 | 1    | 30 | 120 | 0.436 |
| EMA | 2x4 | 0.6 | 1    | 36 | 144 | 0.558 |
| EMA | 2x4 | 0.6 | 1    | 40 | 160 | 0.637 |
| EMA | 2x4 | 0.6 | 1    | 46 | 184 | 0.746 |
| EMA | 2x4 | 0.6 | 1    | 50 | 200 | 0.772 |
| EMA | 2x4 | 0.6 | 1    | 54 | 216 | 0.798 |
| EMA | 2x4 | 0.6 | 1    | 60 | 240 | 0.878 |
| EMA | 2x4 | 0.6 | 1    | 66 | 264 | 0.884 |
| EMA | 2x4 | 0.6 | 1    | 72 | 288 | 0.934 |
| EMA | 2x4 | 0.6 | 1    | 80 | 320 | 0.945 |
| EMA | 2x4 | 0.6 | 1.05 | 6  | 24  | 0.001 |

|     |     |     |      |    |     |       |
|-----|-----|-----|------|----|-----|-------|
| EMA | 2x4 | 0.6 | 1.05 | 10 | 40  | 0.005 |
| EMA | 2x4 | 0.6 | 1.05 | 14 | 56  | 0.03  |
| EMA | 2x4 | 0.6 | 1.05 | 18 | 72  | 0.094 |
| EMA | 2x4 | 0.6 | 1.05 | 22 | 88  | 0.228 |
| EMA | 2x4 | 0.6 | 1.05 | 24 | 96  | 0.246 |
| EMA | 2x4 | 0.6 | 1.05 | 26 | 104 | 0.316 |
| EMA | 2x4 | 0.6 | 1.05 | 32 | 128 | 0.475 |
| EMA | 2x4 | 0.6 | 1.05 | 36 | 144 | 0.533 |
| EMA | 2x4 | 0.6 | 1.05 | 40 | 160 | 0.597 |
| EMA | 2x4 | 0.6 | 1.05 | 46 | 184 | 0.68  |
| EMA | 2x4 | 0.6 | 1.05 | 50 | 200 | 0.717 |
| EMA | 2x4 | 0.6 | 1.05 | 54 | 216 | 0.776 |
| EMA | 2x4 | 0.6 | 1.05 | 60 | 240 | 0.797 |
| EMA | 2x4 | 0.6 | 1.05 | 66 | 264 | 0.835 |
| EMA | 2x4 | 0.6 | 1.05 | 72 | 288 | 0.853 |
| EMA | 2x4 | 0.6 | 1.05 | 80 | 320 | 0.887 |
| EMA | 2x4 | 0.6 | 1.1  | 6  | 24  | 0.001 |
| EMA | 2x4 | 0.6 | 1.1  | 12 | 48  | 0.012 |
| EMA | 2x4 | 0.6 | 1.1  | 18 | 72  | 0.089 |
| EMA | 2x4 | 0.6 | 1.1  | 24 | 96  | 0.223 |
| EMA | 2x4 | 0.6 | 1.1  | 30 | 120 | 0.341 |
| EMA | 2x4 | 0.6 | 1.1  | 32 | 128 | 0.378 |
| EMA | 2x4 | 0.6 | 1.1  | 36 | 144 | 0.434 |
| EMA | 2x4 | 0.6 | 1.1  | 42 | 168 | 0.514 |
| EMA | 2x4 | 0.6 | 1.1  | 46 | 184 | 0.514 |
| EMA | 2x4 | 0.6 | 1.1  | 50 | 200 | 0.577 |
| EMA | 2x4 | 0.6 | 1.1  | 54 | 216 | 0.61  |
| EMA | 2x4 | 0.6 | 1.1  | 60 | 240 | 0.63  |
| EMA | 2x4 | 0.6 | 1.1  | 66 | 264 | 0.663 |
| EMA | 2x4 | 0.6 | 1.1  | 72 | 288 | 0.725 |
| EMA | 2x4 | 0.6 | 1.1  | 80 | 320 | 0.757 |
| FDA | 2x2 | 0.2 | 0.9  | 12 | 24  | 0.035 |
| FDA | 2x2 | 0.2 | 0.9  | 16 | 32  | 0.109 |
| FDA | 2x2 | 0.2 | 0.9  | 24 | 48  | 0.254 |
| FDA | 2x2 | 0.2 | 0.9  | 28 | 56  | 0.335 |
| FDA | 2x2 | 0.2 | 0.9  | 32 | 64  | 0.358 |
| FDA | 2x2 | 0.2 | 0.9  | 36 | 72  | 0.442 |
| FDA | 2x2 | 0.2 | 0.9  | 38 | 76  | 0.473 |
| FDA | 2x2 | 0.2 | 0.9  | 50 | 100 | 0.597 |
| FDA | 2x2 | 0.2 | 0.9  | 60 | 120 | 0.669 |
| FDA | 2x2 | 0.2 | 0.9  | 70 | 140 | 0.734 |

|     |     |     |      |     |     |       |
|-----|-----|-----|------|-----|-----|-------|
| FDA | 2x2 | 0.2 | 0.9  | 80  | 160 | 0.801 |
| FDA | 2x2 | 0.2 | 0.9  | 90  | 180 | 0.856 |
| FDA | 2x2 | 0.2 | 0.9  | 100 | 200 | 0.872 |
| FDA | 2x2 | 0.2 | 0.9  | 108 | 216 | 0.91  |
| FDA | 2x2 | 0.2 | 0.9  | 120 | 240 | 0.928 |
| FDA | 2x2 | 0.2 | 0.9  | 132 | 264 | 0.931 |
| FDA | 2x2 | 0.2 | 0.9  | 144 | 288 | 0.962 |
| FDA | 2x2 | 0.2 | 0.9  | 160 | 320 | 0.975 |
| FDA | 2x2 | 0.2 | 0.95 | 12  | 24  | 0.051 |
| FDA | 2x2 | 0.2 | 0.95 | 16  | 32  | 0.14  |
| FDA | 2x2 | 0.2 | 0.95 | 20  | 40  | 0.28  |
| FDA | 2x2 | 0.2 | 0.95 | 26  | 52  | 0.465 |
| FDA | 2x2 | 0.2 | 0.95 | 32  | 64  | 0.638 |
| FDA | 2x2 | 0.2 | 0.95 | 36  | 72  | 0.686 |
| FDA | 2x2 | 0.2 | 0.95 | 40  | 80  | 0.755 |
| FDA | 2x2 | 0.2 | 0.95 | 50  | 100 | 0.836 |
| FDA | 2x2 | 0.2 | 0.95 | 60  | 120 | 0.907 |
| FDA | 2x2 | 0.2 | 0.95 | 70  | 140 | 0.949 |
| FDA | 2x2 | 0.2 | 0.95 | 80  | 160 | 0.972 |
| FDA | 2x2 | 0.2 | 0.95 | 90  | 180 | 0.987 |
| FDA | 2x2 | 0.2 | 0.95 | 100 | 200 | 0.991 |
| FDA | 2x2 | 0.2 | 0.95 | 108 | 216 | 0.995 |
| FDA | 2x2 | 0.2 | 0.95 | 120 | 240 | 0.994 |
| FDA | 2x2 | 0.2 | 0.95 | 132 | 264 | 0.999 |
| FDA | 2x2 | 0.2 | 0.95 | 144 | 288 | 0.998 |
| FDA | 2x2 | 0.2 | 0.95 | 160 | 320 | 1     |
| FDA | 2x2 | 0.2 | 1    | 12  | 24  | 0.056 |
| FDA | 2x2 | 0.2 | 1    | 16  | 32  | 0.165 |
| FDA | 2x2 | 0.2 | 1    | 20  | 40  | 0.303 |
| FDA | 2x2 | 0.2 | 1    | 28  | 56  | 0.578 |
| FDA | 2x2 | 0.2 | 1    | 36  | 72  | 0.743 |
| FDA | 2x2 | 0.2 | 1    | 40  | 80  | 0.801 |
| FDA | 2x2 | 0.2 | 1    | 50  | 100 | 0.917 |
| FDA | 2x2 | 0.2 | 1    | 60  | 120 | 0.96  |
| FDA | 2x2 | 0.2 | 1    | 70  | 140 | 0.977 |
| FDA | 2x2 | 0.2 | 1    | 80  | 160 | 0.99  |
| FDA | 2x2 | 0.2 | 1    | 90  | 180 | 1     |
| FDA | 2x2 | 0.2 | 1    | 100 | 200 | 1     |
| FDA | 2x2 | 0.2 | 1    | 108 | 216 | 0.999 |
| FDA | 2x2 | 0.2 | 1    | 120 | 240 | 1     |
| FDA | 2x2 | 0.2 | 1    | 132 | 264 | 1     |



|     |     |     |      |     |     |       |
|-----|-----|-----|------|-----|-----|-------|
| FDA | 2x2 | 0.2 | 1    | 144 | 288 | 1     |
| FDA | 2x2 | 0.2 | 1    | 160 | 320 | 1     |
| FDA | 2x2 | 0.2 | 1.05 | 12  | 24  | 0.058 |
| FDA | 2x2 | 0.2 | 1.05 | 18  | 36  | 0.201 |
| FDA | 2x2 | 0.2 | 1.05 | 24  | 48  | 0.387 |
| FDA | 2x2 | 0.2 | 1.05 | 28  | 56  | 0.487 |
| FDA | 2x2 | 0.2 | 1.05 | 32  | 64  | 0.585 |
| FDA | 2x2 | 0.2 | 1.05 | 36  | 72  | 0.632 |
| FDA | 2x2 | 0.2 | 1.05 | 40  | 80  | 0.708 |
| FDA | 2x2 | 0.2 | 1.05 | 50  | 100 | 0.812 |
| FDA | 2x2 | 0.2 | 1.05 | 60  | 120 | 0.883 |
| FDA | 2x2 | 0.2 | 1.05 | 70  | 140 | 0.918 |
| FDA | 2x2 | 0.2 | 1.05 | 80  | 160 | 0.937 |
| FDA | 2x2 | 0.2 | 1.05 | 90  | 180 | 0.96  |
| FDA | 2x2 | 0.2 | 1.05 | 100 | 200 | 0.979 |
| FDA | 2x2 | 0.2 | 1.05 | 108 | 216 | 0.981 |
| FDA | 2x2 | 0.2 | 1.05 | 120 | 240 | 0.994 |
| FDA | 2x2 | 0.2 | 1.05 | 132 | 264 | 0.992 |
| FDA | 2x2 | 0.2 | 1.05 | 144 | 288 | 0.999 |
| FDA | 2x2 | 0.2 | 1.05 | 160 | 320 | 1     |
| FDA | 2x2 | 0.2 | 1.1  | 12  | 24  | 0.039 |
| FDA | 2x2 | 0.2 | 1.1  | 16  | 32  | 0.119 |
| FDA | 2x2 | 0.2 | 1.1  | 20  | 40  | 0.202 |
| FDA | 2x2 | 0.2 | 1.1  | 28  | 56  | 0.346 |
| FDA | 2x2 | 0.2 | 1.1  | 32  | 64  | 0.393 |
| FDA | 2x2 | 0.2 | 1.1  | 36  | 72  | 0.489 |
| FDA | 2x2 | 0.2 | 1.1  | 40  | 80  | 0.523 |
| FDA | 2x2 | 0.2 | 1.1  | 44  | 88  | 0.559 |
| FDA | 2x2 | 0.2 | 1.1  | 60  | 120 | 0.671 |
| FDA | 2x2 | 0.2 | 1.1  | 70  | 140 | 0.729 |
| FDA | 2x2 | 0.2 | 1.1  | 80  | 160 | 0.775 |
| FDA | 2x2 | 0.2 | 1.1  | 90  | 180 | 0.789 |
| FDA | 2x2 | 0.2 | 1.1  | 100 | 200 | 0.851 |
| FDA | 2x2 | 0.2 | 1.1  | 108 | 216 | 0.863 |
| FDA | 2x2 | 0.2 | 1.1  | 120 | 240 | 0.922 |
| FDA | 2x2 | 0.2 | 1.1  | 132 | 264 | 0.937 |
| FDA | 2x2 | 0.2 | 1.1  | 144 | 288 | 0.94  |
| FDA | 2x2 | 0.2 | 1.1  | 160 | 320 | 0.964 |
| FDA | 2x2 | 0.3 | 0.9  | 12  | 24  | 0.01  |
| FDA | 2x2 | 0.3 | 0.9  | 24  | 48  | 0.145 |
| FDA | 2x2 | 0.3 | 0.9  | 36  | 72  | 0.329 |

|     |     |     |      |     |     |       |
|-----|-----|-----|------|-----|-----|-------|
| FDA | 2x2 | 0.3 | 0.9  | 48  | 96  | 0.479 |
| FDA | 2x2 | 0.3 | 0.9  | 60  | 120 | 0.573 |
| FDA | 2x2 | 0.3 | 0.9  | 72  | 144 | 0.613 |
| FDA | 2x2 | 0.3 | 0.9  | 80  | 160 | 0.664 |
| FDA | 2x2 | 0.3 | 0.9  | 88  | 176 | 0.71  |
| FDA | 2x2 | 0.3 | 0.9  | 100 | 200 | 0.753 |
| FDA | 2x2 | 0.3 | 0.9  | 108 | 216 | 0.78  |
| FDA | 2x2 | 0.3 | 0.9  | 120 | 240 | 0.819 |
| FDA | 2x2 | 0.3 | 0.9  | 132 | 264 | 0.861 |
| FDA | 2x2 | 0.3 | 0.9  | 144 | 288 | 0.889 |
| FDA | 2x2 | 0.3 | 0.9  | 160 | 320 | 0.932 |
| FDA | 2x2 | 0.3 | 0.95 | 12  | 24  | 0.023 |
| FDA | 2x2 | 0.3 | 0.95 | 16  | 32  | 0.047 |
| FDA | 2x2 | 0.3 | 0.95 | 24  | 48  | 0.204 |
| FDA | 2x2 | 0.3 | 0.95 | 28  | 56  | 0.28  |
| FDA | 2x2 | 0.3 | 0.95 | 32  | 64  | 0.388 |
| FDA | 2x2 | 0.3 | 0.95 | 36  | 72  | 0.489 |
| FDA | 2x2 | 0.3 | 0.95 | 40  | 80  | 0.568 |
| FDA | 2x2 | 0.3 | 0.95 | 52  | 104 | 0.703 |
| FDA | 2x2 | 0.3 | 0.95 | 60  | 120 | 0.811 |
| FDA | 2x2 | 0.3 | 0.95 | 72  | 144 | 0.852 |
| FDA | 2x2 | 0.3 | 0.95 | 80  | 160 | 0.913 |
| FDA | 2x2 | 0.3 | 0.95 | 88  | 176 | 0.929 |
| FDA | 2x2 | 0.3 | 0.95 | 100 | 200 | 0.955 |
| FDA | 2x2 | 0.3 | 0.95 | 108 | 216 | 0.968 |
| FDA | 2x2 | 0.3 | 0.95 | 120 | 240 | 0.978 |
| FDA | 2x2 | 0.3 | 0.95 | 132 | 264 | 0.984 |
| FDA | 2x2 | 0.3 | 0.95 | 144 | 288 | 0.995 |
| FDA | 2x2 | 0.3 | 0.95 | 160 | 320 | 0.993 |
| FDA | 2x2 | 0.3 | 1    | 12  | 24  | 0.018 |
| FDA | 2x2 | 0.3 | 1    | 16  | 32  | 0.044 |
| FDA | 2x2 | 0.3 | 1    | 24  | 48  | 0.228 |
| FDA | 2x2 | 0.3 | 1    | 28  | 56  | 0.338 |
| FDA | 2x2 | 0.3 | 1    | 32  | 64  | 0.445 |
| FDA | 2x2 | 0.3 | 1    | 36  | 72  | 0.53  |
| FDA | 2x2 | 0.3 | 1    | 40  | 80  | 0.61  |
| FDA | 2x2 | 0.3 | 1    | 44  | 88  | 0.662 |
| FDA | 2x2 | 0.3 | 1    | 60  | 120 | 0.834 |
| FDA | 2x2 | 0.3 | 1    | 72  | 144 | 0.921 |
| FDA | 2x2 | 0.3 | 1    | 80  | 160 | 0.948 |
| FDA | 2x2 | 0.3 | 1    | 88  | 176 | 0.978 |

|     |     |     |      |     |     |       |
|-----|-----|-----|------|-----|-----|-------|
| FDA | 2x2 | 0.3 | 1    | 100 | 200 | 0.987 |
| FDA | 2x2 | 0.3 | 1    | 108 | 216 | 0.992 |
| FDA | 2x2 | 0.3 | 1    | 120 | 240 | 0.995 |
| FDA | 2x2 | 0.3 | 1    | 132 | 264 | 0.999 |
| FDA | 2x2 | 0.3 | 1    | 144 | 288 | 0.999 |
| FDA | 2x2 | 0.3 | 1    | 160 | 320 | 0.999 |
| FDA | 2x2 | 0.3 | 1.05 | 12  | 24  | 0.018 |
| FDA | 2x2 | 0.3 | 1.05 | 16  | 32  | 0.036 |
| FDA | 2x2 | 0.3 | 1.05 | 24  | 48  | 0.188 |
| FDA | 2x2 | 0.3 | 1.05 | 28  | 56  | 0.299 |
| FDA | 2x2 | 0.3 | 1.05 | 32  | 64  | 0.367 |
| FDA | 2x2 | 0.3 | 1.05 | 38  | 76  | 0.496 |
| FDA | 2x2 | 0.3 | 1.05 | 40  | 80  | 0.517 |
| FDA | 2x2 | 0.3 | 1.05 | 48  | 96  | 0.636 |
| FDA | 2x2 | 0.3 | 1.05 | 52  | 104 | 0.684 |
| FDA | 2x2 | 0.3 | 1.05 | 60  | 120 | 0.719 |
| FDA | 2x2 | 0.3 | 1.05 | 72  | 144 | 0.845 |
| FDA | 2x2 | 0.3 | 1.05 | 80  | 160 | 0.86  |
| FDA | 2x2 | 0.3 | 1.05 | 88  | 176 | 0.885 |
| FDA | 2x2 | 0.3 | 1.05 | 100 | 200 | 0.936 |
| FDA | 2x2 | 0.3 | 1.05 | 108 | 216 | 0.952 |
| FDA | 2x2 | 0.3 | 1.05 | 120 | 240 | 0.974 |
| FDA | 2x2 | 0.3 | 1.05 | 132 | 264 | 0.978 |
| FDA | 2x2 | 0.3 | 1.05 | 144 | 288 | 0.978 |
| FDA | 2x2 | 0.3 | 1.05 | 160 | 320 | 0.988 |
| FDA | 2x2 | 0.3 | 1.1  | 12  | 24  | 0.012 |
| FDA | 2x2 | 0.3 | 1.1  | 24  | 48  | 0.138 |
| FDA | 2x2 | 0.3 | 1.1  | 36  | 72  | 0.329 |
| FDA | 2x2 | 0.3 | 1.1  | 48  | 96  | 0.458 |
| FDA | 2x2 | 0.3 | 1.1  | 60  | 120 | 0.519 |
| FDA | 2x2 | 0.3 | 1.1  | 68  | 136 | 0.569 |
| FDA | 2x2 | 0.3 | 1.1  | 76  | 152 | 0.658 |
| FDA | 2x2 | 0.3 | 1.1  | 84  | 168 | 0.699 |
| FDA | 2x2 | 0.3 | 1.1  | 92  | 184 | 0.679 |
| FDA | 2x2 | 0.3 | 1.1  | 100 | 200 | 0.74  |
| FDA | 2x2 | 0.3 | 1.1  | 72  | 144 | 0.594 |
| FDA | 2x2 | 0.3 | 1.1  | 80  | 160 | 0.645 |
| FDA | 2x2 | 0.3 | 1.1  | 88  | 176 | 0.701 |
| FDA | 2x2 | 0.3 | 1.1  | 100 | 200 | 0.743 |
| FDA | 2x2 | 0.3 | 1.1  | 108 | 216 | 0.761 |
| FDA | 2x2 | 0.3 | 1.1  | 120 | 240 | 0.805 |

|     |     |     |      |     |     |       |
|-----|-----|-----|------|-----|-----|-------|
| FDA | 2x2 | 0.3 | 1.1  | 132 | 264 | 0.83  |
| FDA | 2x2 | 0.3 | 1.1  | 144 | 288 | 0.893 |
| FDA | 2x2 | 0.3 | 1.1  | 160 | 320 | 0.904 |
| FDA | 2x2 | 0.4 | 0.9  | 12  | 24  | 0.004 |
| FDA | 2x2 | 0.4 | 0.9  | 24  | 48  | 0.058 |
| FDA | 2x2 | 0.4 | 0.9  | 36  | 72  | 0.183 |
| FDA | 2x2 | 0.4 | 0.9  | 48  | 96  | 0.334 |
| FDA | 2x2 | 0.4 | 0.9  | 56  | 112 | 0.369 |
| FDA | 2x2 | 0.4 | 0.9  | 64  | 128 | 0.473 |
| FDA | 2x2 | 0.4 | 0.9  | 68  | 136 | 0.469 |
| FDA | 2x2 | 0.4 | 0.9  | 76  | 152 | 0.54  |
| FDA | 2x2 | 0.4 | 0.9  | 84  | 168 | 0.572 |
| FDA | 2x2 | 0.4 | 0.9  | 96  | 192 | 0.643 |
| FDA | 2x2 | 0.4 | 0.9  | 108 | 216 | 0.671 |
| FDA | 2x2 | 0.4 | 0.9  | 120 | 240 | 0.716 |
| FDA | 2x2 | 0.4 | 0.9  | 132 | 264 | 0.776 |
| FDA | 2x2 | 0.4 | 0.9  | 144 | 288 | 0.777 |
| FDA | 2x2 | 0.4 | 0.9  | 160 | 320 | 0.813 |
| FDA | 2x2 | 0.4 | 0.95 | 12  | 24  | 0.009 |
| FDA | 2x2 | 0.4 | 0.95 | 24  | 48  | 0.077 |
| FDA | 2x2 | 0.4 | 0.95 | 36  | 72  | 0.266 |
| FDA | 2x2 | 0.4 | 0.95 | 40  | 80  | 0.338 |
| FDA | 2x2 | 0.4 | 0.95 | 44  | 88  | 0.42  |
| FDA | 2x2 | 0.4 | 0.95 | 52  | 104 | 0.535 |
| FDA | 2x2 | 0.4 | 0.95 | 56  | 112 | 0.584 |
| FDA | 2x2 | 0.4 | 0.95 | 64  | 128 | 0.665 |
| FDA | 2x2 | 0.4 | 0.95 | 68  | 136 | 0.663 |
| FDA | 2x2 | 0.4 | 0.95 | 76  | 152 | 0.749 |
| FDA | 2x2 | 0.4 | 0.95 | 84  | 168 | 0.818 |
| FDA | 2x2 | 0.4 | 0.95 | 96  | 192 | 0.859 |
| FDA | 2x2 | 0.4 | 0.95 | 108 | 216 | 0.908 |
| FDA | 2x2 | 0.4 | 0.95 | 120 | 240 | 0.932 |
| FDA | 2x2 | 0.4 | 0.95 | 132 | 264 | 0.95  |
| FDA | 2x2 | 0.4 | 0.95 | 144 | 288 | 0.97  |
| FDA | 2x2 | 0.4 | 0.95 | 160 | 320 | 0.981 |
| FDA | 2x2 | 0.4 | 1    | 12  | 24  | 0.007 |
| FDA | 2x2 | 0.4 | 1    | 24  | 48  | 0.07  |
| FDA | 2x2 | 0.4 | 1    | 36  | 72  | 0.29  |
| FDA | 2x2 | 0.4 | 1    | 40  | 80  | 0.385 |
| FDA | 2x2 | 0.4 | 1    | 48  | 96  | 0.521 |
| FDA | 2x2 | 0.4 | 1    | 56  | 112 | 0.65  |

|     |     |     |      |     |     |       |
|-----|-----|-----|------|-----|-----|-------|
| FDA | 2x2 | 0.4 | 1    | 64  | 128 | 0.737 |
| FDA | 2x2 | 0.4 | 1    | 68  | 136 | 0.787 |
| FDA | 2x2 | 0.4 | 1    | 76  | 152 | 0.809 |
| FDA | 2x2 | 0.4 | 1    | 84  | 168 | 0.866 |
| FDA | 2x2 | 0.4 | 1    | 96  | 192 | 0.924 |
| FDA | 2x2 | 0.4 | 1    | 108 | 216 | 0.944 |
| FDA | 2x2 | 0.4 | 1    | 120 | 240 | 0.971 |
| FDA | 2x2 | 0.4 | 1    | 132 | 264 | 0.978 |
| FDA | 2x2 | 0.4 | 1    | 144 | 288 | 0.985 |
| FDA | 2x2 | 0.4 | 1    | 160 | 320 | 0.994 |
| FDA | 2x2 | 0.4 | 1.05 | 12  | 24  | 0.005 |
| FDA | 2x2 | 0.4 | 1.05 | 24  | 48  | 0.053 |
| FDA | 2x2 | 0.4 | 1.05 | 36  | 72  | 0.268 |
| FDA | 2x2 | 0.4 | 1.05 | 40  | 80  | 0.336 |
| FDA | 2x2 | 0.4 | 1.05 | 44  | 88  | 0.397 |
| FDA | 2x2 | 0.4 | 1.05 | 52  | 104 | 0.51  |
| FDA | 2x2 | 0.4 | 1.05 | 60  | 120 | 0.574 |
| FDA | 2x2 | 0.4 | 1.05 | 64  | 128 | 0.661 |
| FDA | 2x2 | 0.4 | 1.05 | 68  | 136 | 0.66  |
| FDA | 2x2 | 0.4 | 1.05 | 76  | 152 | 0.735 |
| FDA | 2x2 | 0.4 | 1.05 | 84  | 168 | 0.774 |
| FDA | 2x2 | 0.4 | 1.05 | 96  | 192 | 0.84  |
| FDA | 2x2 | 0.4 | 1.05 | 108 | 216 | 0.882 |
| FDA | 2x2 | 0.4 | 1.05 | 120 | 240 | 0.891 |
| FDA | 2x2 | 0.4 | 1.05 | 132 | 264 | 0.934 |
| FDA | 2x2 | 0.4 | 1.05 | 144 | 288 | 0.945 |
| FDA | 2x2 | 0.4 | 1.05 | 160 | 320 | 0.962 |
| FDA | 2x2 | 0.4 | 1.1  | 12  | 24  | 0.005 |
| FDA | 2x2 | 0.4 | 1.1  | 24  | 48  | 0.056 |
| FDA | 2x2 | 0.4 | 1.1  | 36  | 72  | 0.197 |
| FDA | 2x2 | 0.4 | 1.1  | 48  | 96  | 0.336 |
| FDA | 2x2 | 0.4 | 1.1  | 56  | 112 | 0.389 |
| FDA | 2x2 | 0.4 | 1.1  | 64  | 128 | 0.457 |
| FDA | 2x2 | 0.4 | 1.1  | 72  | 144 | 0.519 |
| FDA | 2x2 | 0.4 | 1.1  | 80  | 160 | 0.531 |
| FDA | 2x2 | 0.4 | 1.1  | 88  | 176 | 0.593 |
| FDA | 2x2 | 0.4 | 1.1  | 96  | 192 | 0.606 |
| FDA | 2x2 | 0.4 | 1.1  | 108 | 216 | 0.683 |
| FDA | 2x2 | 0.4 | 1.1  | 120 | 240 | 0.713 |
| FDA | 2x2 | 0.4 | 1.1  | 132 | 264 | 0.756 |
| FDA | 2x2 | 0.4 | 1.1  | 144 | 288 | 0.782 |

|     |     |     |      |     |     |       |
|-----|-----|-----|------|-----|-----|-------|
| FDA | 2x2 | 0.4 | 1.1  | 160 | 320 | 0.804 |
| FDA | 2x2 | 0.5 | 0.9  | 12  | 24  | 0     |
| FDA | 2x2 | 0.5 | 0.9  | 24  | 48  | 0.012 |
| FDA | 2x2 | 0.5 | 0.9  | 36  | 72  | 0.08  |
| FDA | 2x2 | 0.5 | 0.9  | 48  | 96  | 0.204 |
| FDA | 2x2 | 0.5 | 0.9  | 56  | 112 | 0.284 |
| FDA | 2x2 | 0.5 | 0.9  | 64  | 128 | 0.364 |
| FDA | 2x2 | 0.5 | 0.9  | 72  | 144 | 0.403 |
| FDA | 2x2 | 0.5 | 0.9  | 80  | 160 | 0.437 |
| FDA | 2x2 | 0.5 | 0.9  | 88  | 176 | 0.472 |
| FDA | 2x2 | 0.5 | 0.9  | 96  | 192 | 0.535 |
| FDA | 2x2 | 0.5 | 0.9  | 108 | 216 | 0.581 |
| FDA | 2x2 | 0.5 | 0.9  | 120 | 240 | 0.619 |
| FDA | 2x2 | 0.5 | 0.9  | 132 | 264 | 0.679 |
| FDA | 2x2 | 0.5 | 0.9  | 144 | 288 | 0.694 |
| FDA | 2x2 | 0.5 | 0.9  | 160 | 320 | 0.752 |
| FDA | 2x2 | 0.5 | 0.95 | 12  | 24  | 0     |
| FDA | 2x2 | 0.5 | 0.95 | 24  | 48  | 0.013 |
| FDA | 2x2 | 0.5 | 0.95 | 36  | 72  | 0.13  |
| FDA | 2x2 | 0.5 | 0.95 | 44  | 88  | 0.252 |
| FDA | 2x2 | 0.5 | 0.95 | 52  | 104 | 0.364 |
| FDA | 2x2 | 0.5 | 0.95 | 56  | 112 | 0.408 |
| FDA | 2x2 | 0.5 | 0.95 | 64  | 128 | 0.49  |
| FDA | 2x2 | 0.5 | 0.95 | 72  | 144 | 0.581 |
| FDA | 2x2 | 0.5 | 0.95 | 80  | 160 | 0.65  |
| FDA | 2x2 | 0.5 | 0.95 | 88  | 176 | 0.737 |
| FDA | 2x2 | 0.5 | 0.95 | 96  | 192 | 0.772 |
| FDA | 2x2 | 0.5 | 0.95 | 108 | 216 | 0.821 |
| FDA | 2x2 | 0.5 | 0.95 | 120 | 240 | 0.862 |
| FDA | 2x2 | 0.5 | 0.95 | 132 | 264 | 0.889 |
| FDA | 2x2 | 0.5 | 0.95 | 144 | 288 | 0.924 |
| FDA | 2x2 | 0.5 | 0.95 | 160 | 320 | 0.946 |
| FDA | 2x2 | 0.5 | 1    | 12  | 24  | 0.004 |
| FDA | 2x2 | 0.5 | 1    | 24  | 48  | 0.022 |
| FDA | 2x2 | 0.5 | 1    | 36  | 72  | 0.11  |
| FDA | 2x2 | 0.5 | 1    | 40  | 80  | 0.174 |
| FDA | 2x2 | 0.5 | 1    | 48  | 96  | 0.298 |
| FDA | 2x2 | 0.5 | 1    | 52  | 104 | 0.378 |
| FDA | 2x2 | 0.5 | 1    | 56  | 112 | 0.41  |
| FDA | 2x2 | 0.5 | 1    | 64  | 128 | 0.566 |
| FDA | 2x2 | 0.5 | 1    | 72  | 144 | 0.654 |

|     |     |     |      |     |     |       |
|-----|-----|-----|------|-----|-----|-------|
| FDA | 2x2 | 0.5 | 1    | 80  | 160 | 0.712 |
| FDA | 2x2 | 0.5 | 1    | 88  | 176 | 0.752 |
| FDA | 2x2 | 0.5 | 1    | 96  | 192 | 0.8   |
| FDA | 2x2 | 0.5 | 1    | 108 | 216 | 0.862 |
| FDA | 2x2 | 0.5 | 1    | 120 | 240 | 0.911 |
| FDA | 2x2 | 0.5 | 1    | 132 | 264 | 0.937 |
| FDA | 2x2 | 0.5 | 1    | 144 | 288 | 0.954 |
| FDA | 2x2 | 0.5 | 1    | 160 | 320 | 0.976 |
| FDA | 2x2 | 0.5 | 1.05 | 12  | 24  | 0.002 |
| FDA | 2x2 | 0.5 | 1.05 | 24  | 48  | 0.011 |
| FDA | 2x2 | 0.5 | 1.05 | 36  | 72  | 0.121 |
| FDA | 2x2 | 0.5 | 1.05 | 44  | 88  | 0.241 |
| FDA | 2x2 | 0.5 | 1.05 | 48  | 96  | 0.291 |
| FDA | 2x2 | 0.5 | 1.05 | 56  | 112 | 0.387 |
| FDA | 2x2 | 0.5 | 1.05 | 64  | 128 | 0.463 |
| FDA | 2x2 | 0.5 | 1.05 | 72  | 144 | 0.56  |
| FDA | 2x2 | 0.5 | 1.05 | 80  | 160 | 0.631 |
| FDA | 2x2 | 0.5 | 1.05 | 88  | 176 | 0.684 |
| FDA | 2x2 | 0.5 | 1.05 | 96  | 192 | 0.72  |
| FDA | 2x2 | 0.5 | 1.05 | 108 | 216 | 0.759 |
| FDA | 2x2 | 0.5 | 1.05 | 120 | 240 | 0.835 |
| FDA | 2x2 | 0.5 | 1.05 | 132 | 264 | 0.859 |
| FDA | 2x2 | 0.5 | 1.05 | 144 | 288 | 0.865 |
| FDA | 2x2 | 0.5 | 1.05 | 160 | 320 | 0.911 |
| FDA | 2x2 | 0.5 | 1.1  | 12  | 24  | 0.002 |
| FDA | 2x2 | 0.5 | 1.1  | 24  | 48  | 0.008 |
| FDA | 2x2 | 0.5 | 1.1  | 36  | 72  | 0.11  |
| FDA | 2x2 | 0.5 | 1.1  | 44  | 88  | 0.202 |
| FDA | 2x2 | 0.5 | 1.1  | 56  | 112 | 0.298 |
| FDA | 2x2 | 0.5 | 1.1  | 68  | 136 | 0.376 |
| FDA | 2x2 | 0.5 | 1.1  | 72  | 144 | 0.414 |
| FDA | 2x2 | 0.5 | 1.1  | 76  | 152 | 0.437 |
| FDA | 2x2 | 0.5 | 1.1  | 80  | 160 | 0.45  |
| FDA | 2x2 | 0.5 | 1.1  | 88  | 176 | 0.505 |
| FDA | 2x2 | 0.5 | 1.1  | 96  | 192 | 0.525 |
| FDA | 2x2 | 0.5 | 1.1  | 108 | 216 | 0.57  |
| FDA | 2x2 | 0.5 | 1.1  | 120 | 240 | 0.598 |
| FDA | 2x2 | 0.5 | 1.1  | 132 | 264 | 0.653 |
| FDA | 2x2 | 0.5 | 1.1  | 144 | 288 | 0.718 |
| FDA | 2x2 | 0.5 | 1.1  | 160 | 320 | 0.739 |
| FDA | 2x2 | 0.6 | 0.9  | 12  | 24  | 0     |

|     |     |     |      |     |     |       |
|-----|-----|-----|------|-----|-----|-------|
| FDA | 2x2 | 0.6 | 0.9  | 20  | 40  | 0.001 |
| FDA | 2x2 | 0.6 | 0.9  | 28  | 56  | 0.004 |
| FDA | 2x2 | 0.6 | 0.9  | 36  | 72  | 0.034 |
| FDA | 2x2 | 0.6 | 0.9  | 44  | 88  | 0.076 |
| FDA | 2x2 | 0.6 | 0.9  | 52  | 104 | 0.126 |
| FDA | 2x2 | 0.6 | 0.9  | 64  | 128 | 0.275 |
| FDA | 2x2 | 0.6 | 0.9  | 72  | 144 | 0.306 |
| FDA | 2x2 | 0.6 | 0.9  | 80  | 160 | 0.37  |
| FDA | 2x2 | 0.6 | 0.9  | 92  | 184 | 0.429 |
| FDA | 2x2 | 0.6 | 0.9  | 100 | 200 | 0.443 |
| FDA | 2x2 | 0.6 | 0.9  | 108 | 216 | 0.489 |
| FDA | 2x2 | 0.6 | 0.9  | 120 | 240 | 0.528 |
| FDA | 2x2 | 0.6 | 0.9  | 132 | 264 | 0.611 |
| FDA | 2x2 | 0.6 | 0.9  | 144 | 288 | 0.597 |
| FDA | 2x2 | 0.6 | 0.9  | 160 | 320 | 0.652 |
| FDA | 2x2 | 0.6 | 0.95 | 12  | 24  | 0     |
| FDA | 2x2 | 0.6 | 0.95 | 20  | 40  | 0.004 |
| FDA | 2x2 | 0.6 | 0.95 | 28  | 56  | 0.012 |
| FDA | 2x2 | 0.6 | 0.95 | 36  | 72  | 0.045 |
| FDA | 2x2 | 0.6 | 0.95 | 44  | 88  | 0.094 |
| FDA | 2x2 | 0.6 | 0.95 | 52  | 104 | 0.197 |
| FDA | 2x2 | 0.6 | 0.95 | 60  | 120 | 0.283 |
| FDA | 2x2 | 0.6 | 0.95 | 64  | 128 | 0.322 |
| FDA | 2x2 | 0.6 | 0.95 | 72  | 144 | 0.439 |
| FDA | 2x2 | 0.6 | 0.95 | 80  | 160 | 0.495 |
| FDA | 2x2 | 0.6 | 0.95 | 92  | 184 | 0.578 |
| FDA | 2x2 | 0.6 | 0.95 | 100 | 200 | 0.64  |
| FDA | 2x2 | 0.6 | 0.95 | 108 | 216 | 0.695 |
| FDA | 2x2 | 0.6 | 0.95 | 120 | 240 | 0.774 |
| FDA | 2x2 | 0.6 | 0.95 | 132 | 264 | 0.806 |
| FDA | 2x2 | 0.6 | 0.95 | 144 | 288 | 0.824 |
| FDA | 2x2 | 0.6 | 0.95 | 160 | 320 | 0.845 |
| FDA | 2x2 | 0.6 | 1    | 12  | 24  | 0     |
| FDA | 2x2 | 0.6 | 1    | 20  | 40  | 0.004 |
| FDA | 2x2 | 0.6 | 1    | 28  | 56  | 0.009 |
| FDA | 2x2 | 0.6 | 1    | 36  | 72  | 0.034 |
| FDA | 2x2 | 0.6 | 1    | 44  | 88  | 0.114 |
| FDA | 2x2 | 0.6 | 1    | 48  | 96  | 0.165 |
| FDA | 2x2 | 0.6 | 1    | 52  | 104 | 0.214 |
| FDA | 2x2 | 0.6 | 1    | 60  | 120 | 0.329 |
| FDA | 2x2 | 0.6 | 1    | 72  | 144 | 0.482 |



|     |     |     |      |     |     |       |
|-----|-----|-----|------|-----|-----|-------|
| FDA | 2x2 | 0.6 | 1    | 80  | 160 | 0.559 |
| FDA | 2x2 | 0.6 | 1    | 92  | 184 | 0.658 |
| FDA | 2x2 | 0.6 | 1    | 100 | 200 | 0.714 |
| FDA | 2x2 | 0.6 | 1    | 108 | 216 | 0.763 |
| FDA | 2x2 | 0.6 | 1    | 120 | 240 | 0.815 |
| FDA | 2x2 | 0.6 | 1    | 132 | 264 | 0.864 |
| FDA | 2x2 | 0.6 | 1    | 144 | 288 | 0.889 |
| FDA | 2x2 | 0.6 | 1    | 160 | 320 | 0.93  |
| FDA | 2x2 | 0.6 | 1.05 | 12  | 24  | 0     |
| FDA | 2x2 | 0.6 | 1.05 | 20  | 40  | 0.004 |
| FDA | 2x2 | 0.6 | 1.05 | 28  | 56  | 0.015 |
| FDA | 2x2 | 0.6 | 1.05 | 36  | 72  | 0.038 |
| FDA | 2x2 | 0.6 | 1.05 | 44  | 88  | 0.105 |
| FDA | 2x2 | 0.6 | 1.05 | 48  | 96  | 0.14  |
| FDA | 2x2 | 0.6 | 1.05 | 52  | 104 | 0.207 |
| FDA | 2x2 | 0.6 | 1.05 | 64  | 128 | 0.334 |
| FDA | 2x2 | 0.6 | 1.05 | 72  | 144 | 0.445 |
| FDA | 2x2 | 0.6 | 1.05 | 80  | 160 | 0.501 |
| FDA | 2x2 | 0.6 | 1.05 | 92  | 184 | 0.579 |
| FDA | 2x2 | 0.6 | 1.05 | 100 | 200 | 0.633 |
| FDA | 2x2 | 0.6 | 1.05 | 108 | 216 | 0.682 |
| FDA | 2x2 | 0.6 | 1.05 | 120 | 240 | 0.743 |
| FDA | 2x2 | 0.6 | 1.05 | 132 | 264 | 0.761 |
| FDA | 2x2 | 0.6 | 1.05 | 144 | 288 | 0.805 |
| FDA | 2x2 | 0.6 | 1.05 | 160 | 320 | 0.847 |
| FDA | 2x2 | 0.6 | 1.1  | 12  | 24  | 0     |
| FDA | 2x2 | 0.6 | 1.1  | 24  | 48  | 0.002 |
| FDA | 2x2 | 0.6 | 1.1  | 36  | 72  | 0.037 |
| FDA | 2x2 | 0.6 | 1.1  | 48  | 96  | 0.119 |
| FDA | 2x2 | 0.6 | 1.1  | 60  | 120 | 0.233 |
| FDA | 2x2 | 0.6 | 1.1  | 64  | 128 | 0.277 |
| FDA | 2x2 | 0.6 | 1.1  | 72  | 144 | 0.325 |
| FDA | 2x2 | 0.6 | 1.1  | 84  | 168 | 0.407 |
| FDA | 2x2 | 0.6 | 1.1  | 92  | 184 | 0.436 |
| FDA | 2x2 | 0.6 | 1.1  | 100 | 200 | 0.451 |
| FDA | 2x2 | 0.6 | 1.1  | 108 | 216 | 0.494 |
| FDA | 2x2 | 0.6 | 1.1  | 120 | 240 | 0.5   |
| FDA | 2x2 | 0.6 | 1.1  | 132 | 264 | 0.58  |
| FDA | 2x2 | 0.6 | 1.1  | 144 | 288 | 0.614 |
| FDA | 2x2 | 0.6 | 1.1  | 160 | 320 | 0.637 |
| FDA | 3x3 | 0.2 | 0.9  | 9   | 27  | 0.079 |

|     |     |     |      |     |     |       |
|-----|-----|-----|------|-----|-----|-------|
| FDA | 3x3 | 0.2 | 0.9  | 12  | 36  | 0.171 |
| FDA | 3x3 | 0.2 | 0.9  | 15  | 45  | 0.281 |
| FDA | 3x3 | 0.2 | 0.9  | 18  | 54  | 0.367 |
| FDA | 3x3 | 0.2 | 0.9  | 21  | 63  | 0.43  |
| FDA | 3x3 | 0.2 | 0.9  | 24  | 72  | 0.49  |
| FDA | 3x3 | 0.2 | 0.9  | 27  | 81  | 0.5   |
| FDA | 3x3 | 0.2 | 0.9  | 33  | 99  | 0.632 |
| FDA | 3x3 | 0.2 | 0.9  | 39  | 117 | 0.645 |
| FDA | 3x3 | 0.2 | 0.9  | 45  | 135 | 0.72  |
| FDA | 3x3 | 0.2 | 0.9  | 54  | 162 | 0.811 |
| FDA | 3x3 | 0.2 | 0.9  | 60  | 180 | 0.811 |
| FDA | 3x3 | 0.2 | 0.9  | 66  | 198 | 0.848 |
| FDA | 3x3 | 0.2 | 0.9  | 75  | 225 | 0.897 |
| FDA | 3x3 | 0.2 | 0.9  | 81  | 243 | 0.896 |
| FDA | 3x3 | 0.2 | 0.9  | 90  | 270 | 0.932 |
| FDA | 3x3 | 0.2 | 0.9  | 96  | 288 | 0.943 |
| FDA | 3x3 | 0.2 | 0.9  | 105 | 315 | 0.963 |
| FDA | 3x3 | 0.2 | 0.95 | 9   | 27  | 0.098 |
| FDA | 3x3 | 0.2 | 0.95 | 12  | 36  | 0.233 |
| FDA | 3x3 | 0.2 | 0.95 | 15  | 45  | 0.367 |
| FDA | 3x3 | 0.2 | 0.95 | 18  | 54  | 0.476 |
| FDA | 3x3 | 0.2 | 0.95 | 21  | 63  | 0.593 |
| FDA | 3x3 | 0.2 | 0.95 | 24  | 72  | 0.668 |
| FDA | 3x3 | 0.2 | 0.95 | 27  | 81  | 0.707 |
| FDA | 3x3 | 0.2 | 0.95 | 33  | 99  | 0.824 |
| FDA | 3x3 | 0.2 | 0.95 | 39  | 117 | 0.893 |
| FDA | 3x3 | 0.2 | 0.95 | 45  | 135 | 0.921 |
| FDA | 3x3 | 0.2 | 0.95 | 54  | 162 | 0.962 |
| FDA | 3x3 | 0.2 | 0.95 | 60  | 180 | 0.97  |
| FDA | 3x3 | 0.2 | 0.95 | 66  | 198 | 0.986 |
| FDA | 3x3 | 0.2 | 0.95 | 75  | 225 | 0.984 |
| FDA | 3x3 | 0.2 | 0.95 | 81  | 243 | 0.995 |
| FDA | 3x3 | 0.2 | 0.95 | 90  | 270 | 0.996 |
| FDA | 3x3 | 0.2 | 0.95 | 96  | 288 | 0.997 |
| FDA | 3x3 | 0.2 | 0.95 | 105 | 315 | 0.997 |
| FDA | 3x3 | 0.2 | 1    | 9   | 27  | 0.112 |
| FDA | 3x3 | 0.2 | 1    | 12  | 36  | 0.265 |
| FDA | 3x3 | 0.2 | 1    | 15  | 45  | 0.417 |
| FDA | 3x3 | 0.2 | 1    | 18  | 54  | 0.53  |
| FDA | 3x3 | 0.2 | 1    | 24  | 72  | 0.716 |
| FDA | 3x3 | 0.2 | 1    | 27  | 81  | 0.811 |

|     |     |     |      |     |     |       |
|-----|-----|-----|------|-----|-----|-------|
| FDA | 3x3 | 0.2 | 1    | 33  | 99  | 0.875 |
| FDA | 3x3 | 0.2 | 1    | 39  | 117 | 0.92  |
| FDA | 3x3 | 0.2 | 1    | 45  | 135 | 0.961 |
| FDA | 3x3 | 0.2 | 1    | 54  | 162 | 0.979 |
| FDA | 3x3 | 0.2 | 1    | 60  | 180 | 0.988 |
| FDA | 3x3 | 0.2 | 1    | 66  | 198 | 0.992 |
| FDA | 3x3 | 0.2 | 1    | 75  | 225 | 0.997 |
| FDA | 3x3 | 0.2 | 1    | 81  | 243 | 0.997 |
| FDA | 3x3 | 0.2 | 1    | 90  | 270 | 1     |
| FDA | 3x3 | 0.2 | 1    | 96  | 288 | 0.999 |
| FDA | 3x3 | 0.2 | 1    | 105 | 315 | 1     |
| FDA | 3x3 | 0.2 | 1.05 | 9   | 27  | 0.106 |
| FDA | 3x3 | 0.2 | 1.05 | 12  | 36  | 0.235 |
| FDA | 3x3 | 0.2 | 1.05 | 15  | 45  | 0.359 |
| FDA | 3x3 | 0.2 | 1.05 | 18  | 54  | 0.467 |
| FDA | 3x3 | 0.2 | 1.05 | 21  | 63  | 0.558 |
| FDA | 3x3 | 0.2 | 1.05 | 24  | 72  | 0.624 |
| FDA | 3x3 | 0.2 | 1.05 | 27  | 81  | 0.681 |
| FDA | 3x3 | 0.2 | 1.05 | 33  | 99  | 0.767 |
| FDA | 3x3 | 0.2 | 1.05 | 39  | 117 | 0.864 |
| FDA | 3x3 | 0.2 | 1.05 | 45  | 135 | 0.893 |
| FDA | 3x3 | 0.2 | 1.05 | 54  | 162 | 0.931 |
| FDA | 3x3 | 0.2 | 1.05 | 60  | 180 | 0.946 |
| FDA | 3x3 | 0.2 | 1.05 | 66  | 198 | 0.971 |
| FDA | 3x3 | 0.2 | 1.05 | 75  | 225 | 0.971 |
| FDA | 3x3 | 0.2 | 1.05 | 81  | 243 | 0.985 |
| FDA | 3x3 | 0.2 | 1.05 | 90  | 270 | 0.991 |
| FDA | 3x3 | 0.2 | 1.05 | 96  | 288 | 0.995 |
| FDA | 3x3 | 0.2 | 1.05 | 105 | 315 | 0.996 |
| FDA | 3x3 | 0.2 | 1.1  | 9   | 27  | 0.086 |
| FDA | 3x3 | 0.2 | 1.1  | 12  | 36  | 0.173 |
| FDA | 3x3 | 0.2 | 1.1  | 15  | 45  | 0.292 |
| FDA | 3x3 | 0.2 | 1.1  | 18  | 54  | 0.368 |
| FDA | 3x3 | 0.2 | 1.1  | 21  | 63  | 0.428 |
| FDA | 3x3 | 0.2 | 1.1  | 24  | 72  | 0.449 |
| FDA | 3x3 | 0.2 | 1.1  | 27  | 81  | 0.504 |
| FDA | 3x3 | 0.2 | 1.1  | 30  | 90  | 0.56  |
| FDA | 3x3 | 0.2 | 1.1  | 39  | 117 | 0.65  |
| FDA | 3x3 | 0.2 | 1.1  | 45  | 135 | 0.709 |
| FDA | 3x3 | 0.2 | 1.1  | 54  | 162 | 0.76  |
| FDA | 3x3 | 0.2 | 1.1  | 60  | 180 | 0.804 |

|     |     |     |      |     |     |       |
|-----|-----|-----|------|-----|-----|-------|
| FDA | 3x3 | 0.2 | 1.1  | 66  | 198 | 0.826 |
| FDA | 3x3 | 0.2 | 1.1  | 75  | 225 | 0.872 |
| FDA | 3x3 | 0.2 | 1.1  | 81  | 243 | 0.887 |
| FDA | 3x3 | 0.2 | 1.1  | 90  | 270 | 0.92  |
| FDA | 3x3 | 0.2 | 1.1  | 96  | 288 | 0.942 |
| FDA | 3x3 | 0.2 | 1.1  | 105 | 315 | 0.953 |
| FDA | 3x3 | 0.3 | 0.9  | 9   | 27  | 0.044 |
| FDA | 3x3 | 0.3 | 0.9  | 15  | 45  | 0.202 |
| FDA | 3x3 | 0.3 | 0.9  | 24  | 72  | 0.407 |
| FDA | 3x3 | 0.3 | 0.9  | 33  | 99  | 0.541 |
| FDA | 3x3 | 0.3 | 0.9  | 39  | 117 | 0.603 |
| FDA | 3x3 | 0.3 | 0.9  | 48  | 144 | 0.708 |
| FDA | 3x3 | 0.3 | 0.9  | 54  | 162 | 0.744 |
| FDA | 3x3 | 0.3 | 0.9  | 60  | 180 | 0.782 |
| FDA | 3x3 | 0.3 | 0.9  | 66  | 198 | 0.795 |
| FDA | 3x3 | 0.3 | 0.9  | 75  | 225 | 0.82  |
| FDA | 3x3 | 0.3 | 0.9  | 81  | 243 | 0.85  |
| FDA | 3x3 | 0.3 | 0.9  | 90  | 270 | 0.881 |
| FDA | 3x3 | 0.3 | 0.9  | 96  | 288 | 0.873 |
| FDA | 3x3 | 0.3 | 0.9  | 105 | 315 | 0.923 |
| FDA | 3x3 | 0.3 | 0.95 | 9   | 27  | 0.058 |
| FDA | 3x3 | 0.3 | 0.95 | 12  | 36  | 0.127 |
| FDA | 3x3 | 0.3 | 0.95 | 15  | 45  | 0.241 |
| FDA | 3x3 | 0.3 | 0.95 | 18  | 54  | 0.351 |
| FDA | 3x3 | 0.3 | 0.95 | 21  | 63  | 0.433 |
| FDA | 3x3 | 0.3 | 0.95 | 24  | 72  | 0.547 |
| FDA | 3x3 | 0.3 | 0.95 | 27  | 81  | 0.61  |
| FDA | 3x3 | 0.3 | 0.95 | 36  | 108 | 0.781 |
| FDA | 3x3 | 0.3 | 0.95 | 39  | 117 | 0.804 |
| FDA | 3x3 | 0.3 | 0.95 | 48  | 144 | 0.882 |
| FDA | 3x3 | 0.3 | 0.95 | 54  | 162 | 0.906 |
| FDA | 3x3 | 0.3 | 0.95 | 60  | 180 | 0.925 |
| FDA | 3x3 | 0.3 | 0.95 | 66  | 198 | 0.955 |
| FDA | 3x3 | 0.3 | 0.95 | 75  | 225 | 0.972 |
| FDA | 3x3 | 0.3 | 0.95 | 81  | 243 | 0.974 |
| FDA | 3x3 | 0.3 | 0.95 | 90  | 270 | 0.985 |
| FDA | 3x3 | 0.3 | 0.95 | 96  | 288 | 0.989 |
| FDA | 3x3 | 0.3 | 0.95 | 105 | 315 | 0.997 |
| FDA | 3x3 | 0.3 | 1    | 9   | 27  | 0.07  |
| FDA | 3x3 | 0.3 | 1    | 12  | 36  | 0.145 |
| FDA | 3x3 | 0.3 | 1    | 15  | 45  | 0.276 |

|     |     |     |      |     |     |       |
|-----|-----|-----|------|-----|-----|-------|
| FDA | 3x3 | 0.3 | 1    | 18  | 54  | 0.389 |
| FDA | 3x3 | 0.3 | 1    | 21  | 63  | 0.494 |
| FDA | 3x3 | 0.3 | 1    | 24  | 72  | 0.579 |
| FDA | 3x3 | 0.3 | 1    | 27  | 81  | 0.677 |
| FDA | 3x3 | 0.3 | 1    | 30  | 90  | 0.749 |
| FDA | 3x3 | 0.3 | 1    | 39  | 117 | 0.832 |
| FDA | 3x3 | 0.3 | 1    | 48  | 144 | 0.937 |
| FDA | 3x3 | 0.3 | 1    | 54  | 162 | 0.943 |
| FDA | 3x3 | 0.3 | 1    | 60  | 180 | 0.977 |
| FDA | 3x3 | 0.3 | 1    | 66  | 198 | 0.985 |
| FDA | 3x3 | 0.3 | 1    | 75  | 225 | 0.992 |
| FDA | 3x3 | 0.3 | 1    | 81  | 243 | 0.995 |
| FDA | 3x3 | 0.3 | 1    | 90  | 270 | 0.995 |
| FDA | 3x3 | 0.3 | 1    | 96  | 288 | 0.999 |
| FDA | 3x3 | 0.3 | 1    | 105 | 315 | 0.998 |
| FDA | 3x3 | 0.3 | 1.05 | 9   | 27  | 0.071 |
| FDA | 3x3 | 0.3 | 1.05 | 12  | 36  | 0.122 |
| FDA | 3x3 | 0.3 | 1.05 | 15  | 45  | 0.239 |
| FDA | 3x3 | 0.3 | 1.05 | 18  | 54  | 0.353 |
| FDA | 3x3 | 0.3 | 1.05 | 21  | 63  | 0.436 |
| FDA | 3x3 | 0.3 | 1.05 | 24  | 72  | 0.537 |
| FDA | 3x3 | 0.3 | 1.05 | 27  | 81  | 0.6   |
| FDA | 3x3 | 0.3 | 1.05 | 33  | 99  | 0.728 |
| FDA | 3x3 | 0.3 | 1.05 | 36  | 108 | 0.741 |
| FDA | 3x3 | 0.3 | 1.05 | 39  | 117 | 0.76  |
| FDA | 3x3 | 0.3 | 1.05 | 48  | 144 | 0.848 |
| FDA | 3x3 | 0.3 | 1.05 | 54  | 162 | 0.91  |
| FDA | 3x3 | 0.3 | 1.05 | 60  | 180 | 0.914 |
| FDA | 3x3 | 0.3 | 1.05 | 66  | 198 | 0.941 |
| FDA | 3x3 | 0.3 | 1.05 | 75  | 225 | 0.96  |
| FDA | 3x3 | 0.3 | 1.05 | 81  | 243 | 0.966 |
| FDA | 3x3 | 0.3 | 1.05 | 90  | 270 | 0.983 |
| FDA | 3x3 | 0.3 | 1.05 | 96  | 288 | 0.982 |
| FDA | 3x3 | 0.3 | 1.05 | 105 | 315 | 0.992 |
| FDA | 3x3 | 0.3 | 1.1  | 9   | 27  | 0.048 |
| FDA | 3x3 | 0.3 | 1.1  | 15  | 45  | 0.197 |
| FDA | 3x3 | 0.3 | 1.1  | 24  | 72  | 0.436 |
| FDA | 3x3 | 0.3 | 1.1  | 33  | 99  | 0.574 |
| FDA | 3x3 | 0.3 | 1.1  | 39  | 117 | 0.618 |
| FDA | 3x3 | 0.3 | 1.1  | 45  | 135 | 0.684 |
| FDA | 3x3 | 0.3 | 1.1  | 51  | 153 | 0.725 |

|     |     |     |      |     |     |       |
|-----|-----|-----|------|-----|-----|-------|
| FDA | 3x3 | 0.3 | 1.1  | 51  | 153 | 0.686 |
| FDA | 3x3 | 0.3 | 1.1  | 63  | 189 | 0.794 |
| FDA | 3x3 | 0.3 | 1.1  | 66  | 198 | 0.789 |
| FDA | 3x3 | 0.3 | 1.1  | 48  | 144 | 0.682 |
| FDA | 3x3 | 0.3 | 1.1  | 54  | 162 | 0.728 |
| FDA | 3x3 | 0.3 | 1.1  | 60  | 180 | 0.778 |
| FDA | 3x3 | 0.3 | 1.1  | 66  | 198 | 0.803 |
| FDA | 3x3 | 0.3 | 1.1  | 75  | 225 | 0.825 |
| FDA | 3x3 | 0.3 | 1.1  | 81  | 243 | 0.871 |
| FDA | 3x3 | 0.3 | 1.1  | 90  | 270 | 0.884 |
| FDA | 3x3 | 0.3 | 1.1  | 96  | 288 | 0.906 |
| FDA | 3x3 | 0.3 | 1.1  | 105 | 315 | 0.921 |
| FDA | 3x3 | 0.4 | 0.9  | 9   | 27  | 0.069 |
| FDA | 3x3 | 0.4 | 0.9  | 15  | 45  | 0.235 |
| FDA | 3x3 | 0.4 | 0.9  | 24  | 72  | 0.475 |
| FDA | 3x3 | 0.4 | 0.9  | 33  | 99  | 0.703 |
| FDA | 3x3 | 0.4 | 0.9  | 39  | 117 | 0.745 |
| FDA | 3x3 | 0.4 | 0.9  | 42  | 126 | 0.759 |
| FDA | 3x3 | 0.4 | 0.9  | 45  | 135 | 0.808 |
| FDA | 3x3 | 0.4 | 0.9  | 51  | 153 | 0.822 |
| FDA | 3x3 | 0.4 | 0.9  | 54  | 162 | 0.895 |
| FDA | 3x3 | 0.4 | 0.9  | 63  | 189 | 0.914 |
| FDA | 3x3 | 0.4 | 0.9  | 72  | 216 | 0.939 |
| FDA | 3x3 | 0.4 | 0.9  | 81  | 243 | 0.948 |
| FDA | 3x3 | 0.4 | 0.9  | 90  | 270 | 0.971 |
| FDA | 3x3 | 0.4 | 0.9  | 96  | 288 | 0.981 |
| FDA | 3x3 | 0.4 | 0.9  | 105 | 315 | 0.983 |
| FDA | 3x3 | 0.4 | 0.95 | 9   | 27  | 0.066 |
| FDA | 3x3 | 0.4 | 0.95 | 15  | 45  | 0.254 |
| FDA | 3x3 | 0.4 | 0.95 | 24  | 72  | 0.558 |
| FDA | 3x3 | 0.4 | 0.95 | 27  | 81  | 0.674 |
| FDA | 3x3 | 0.4 | 0.95 | 30  | 90  | 0.711 |
| FDA | 3x3 | 0.4 | 0.95 | 36  | 108 | 0.84  |
| FDA | 3x3 | 0.4 | 0.95 | 39  | 117 | 0.842 |
| FDA | 3x3 | 0.4 | 0.95 | 42  | 126 | 0.876 |
| FDA | 3x3 | 0.4 | 0.95 | 45  | 135 | 0.919 |
| FDA | 3x3 | 0.4 | 0.95 | 51  | 153 | 0.942 |
| FDA | 3x3 | 0.4 | 0.95 | 54  | 162 | 0.959 |
| FDA | 3x3 | 0.4 | 0.95 | 63  | 189 | 0.979 |
| FDA | 3x3 | 0.4 | 0.95 | 72  | 216 | 0.982 |
| FDA | 3x3 | 0.4 | 0.95 | 81  | 243 | 0.993 |

|     |     |     |      |     |     |       |
|-----|-----|-----|------|-----|-----|-------|
| FDA | 3x3 | 0.4 | 0.95 | 90  | 270 | 0.996 |
| FDA | 3x3 | 0.4 | 0.95 | 96  | 288 | 0.999 |
| FDA | 3x3 | 0.4 | 0.95 | 105 | 315 | 1     |
| FDA | 3x3 | 0.4 | 1    | 9   | 27  | 0.094 |
| FDA | 3x3 | 0.4 | 1    | 15  | 45  | 0.265 |
| FDA | 3x3 | 0.4 | 1    | 24  | 72  | 0.605 |
| FDA | 3x3 | 0.4 | 1    | 27  | 81  | 0.708 |
| FDA | 3x3 | 0.4 | 1    | 33  | 99  | 0.816 |
| FDA | 3x3 | 0.4 | 1    | 39  | 117 | 0.902 |
| FDA | 3x3 | 0.4 | 1    | 42  | 126 | 0.92  |
| FDA | 3x3 | 0.4 | 1    | 45  | 135 | 0.949 |
| FDA | 3x3 | 0.4 | 1    | 51  | 153 | 0.951 |
| FDA | 3x3 | 0.4 | 1    | 54  | 162 | 0.97  |
| FDA | 3x3 | 0.4 | 1    | 63  | 189 | 0.996 |
| FDA | 3x3 | 0.4 | 1    | 72  | 216 | 0.996 |
| FDA | 3x3 | 0.4 | 1    | 81  | 243 | 0.999 |
| FDA | 3x3 | 0.4 | 1    | 90  | 270 | 1     |
| FDA | 3x3 | 0.4 | 1    | 96  | 288 | 1     |
| FDA | 3x3 | 0.4 | 1    | 105 | 315 | 1     |
| FDA | 3x3 | 0.4 | 1.05 | 9   | 27  | 0.085 |
| FDA | 3x3 | 0.4 | 1.05 | 15  | 45  | 0.267 |
| FDA | 3x3 | 0.4 | 1.05 | 24  | 72  | 0.594 |
| FDA | 3x3 | 0.4 | 1.05 | 27  | 81  | 0.665 |
| FDA | 3x3 | 0.4 | 1.05 | 30  | 90  | 0.714 |
| FDA | 3x3 | 0.4 | 1.05 | 36  | 108 | 0.81  |
| FDA | 3x3 | 0.4 | 1.05 | 39  | 117 | 0.86  |
| FDA | 3x3 | 0.4 | 1.05 | 42  | 126 | 0.87  |
| FDA | 3x3 | 0.4 | 1.05 | 45  | 135 | 0.896 |
| FDA | 3x3 | 0.4 | 1.05 | 51  | 153 | 0.934 |
| FDA | 3x3 | 0.4 | 1.05 | 54  | 162 | 0.94  |
| FDA | 3x3 | 0.4 | 1.05 | 63  | 189 | 0.968 |
| FDA | 3x3 | 0.4 | 1.05 | 72  | 216 | 0.982 |
| FDA | 3x3 | 0.4 | 1.05 | 81  | 243 | 0.993 |
| FDA | 3x3 | 0.4 | 1.05 | 90  | 270 | 0.998 |
| FDA | 3x3 | 0.4 | 1.05 | 96  | 288 | 0.995 |
| FDA | 3x3 | 0.4 | 1.05 | 105 | 315 | 0.999 |
| FDA | 3x3 | 0.4 | 1.1  | 9   | 27  | 0.075 |
| FDA | 3x3 | 0.4 | 1.1  | 15  | 45  | 0.227 |
| FDA | 3x3 | 0.4 | 1.1  | 24  | 72  | 0.506 |
| FDA | 3x3 | 0.4 | 1.1  | 33  | 99  | 0.666 |
| FDA | 3x3 | 0.4 | 1.1  | 39  | 117 | 0.75  |

|     |     |     |      |     |     |       |
|-----|-----|-----|------|-----|-----|-------|
| FDA | 3x3 | 0.4 | 1.1  | 42  | 126 | 0.788 |
| FDA | 3x3 | 0.4 | 1.1  | 48  | 144 | 0.837 |
| FDA | 3x3 | 0.4 | 1.1  | 54  | 162 | 0.867 |
| FDA | 3x3 | 0.4 | 1.1  | 57  | 171 | 0.893 |
| FDA | 3x3 | 0.4 | 1.1  | 63  | 189 | 0.899 |
| FDA | 3x3 | 0.4 | 1.1  | 72  | 216 | 0.951 |
| FDA | 3x3 | 0.4 | 1.1  | 81  | 243 | 0.966 |
| FDA | 3x3 | 0.4 | 1.1  | 90  | 270 | 0.97  |
| FDA | 3x3 | 0.4 | 1.1  | 96  | 288 | 0.974 |
| FDA | 3x3 | 0.4 | 1.1  | 105 | 315 | 0.983 |
| FDA | 3x3 | 0.5 | 0.9  | 9   | 27  | 0.104 |
| FDA | 3x3 | 0.5 | 0.9  | 15  | 45  | 0.311 |
| FDA | 3x3 | 0.5 | 0.9  | 24  | 72  | 0.576 |
| FDA | 3x3 | 0.5 | 0.9  | 33  | 99  | 0.738 |
| FDA | 3x3 | 0.5 | 0.9  | 39  | 117 | 0.819 |
| FDA | 3x3 | 0.5 | 0.9  | 42  | 126 | 0.811 |
| FDA | 3x3 | 0.5 | 0.9  | 48  | 144 | 0.863 |
| FDA | 3x3 | 0.5 | 0.9  | 54  | 162 | 0.888 |
| FDA | 3x3 | 0.5 | 0.9  | 57  | 171 | 0.907 |
| FDA | 3x3 | 0.5 | 0.9  | 63  | 189 | 0.949 |
| FDA | 3x3 | 0.5 | 0.9  | 72  | 216 | 0.957 |
| FDA | 3x3 | 0.5 | 0.9  | 81  | 243 | 0.968 |
| FDA | 3x3 | 0.5 | 0.9  | 90  | 270 | 0.971 |
| FDA | 3x3 | 0.5 | 0.9  | 96  | 288 | 0.976 |
| FDA | 3x3 | 0.5 | 0.9  | 105 | 315 | 0.981 |
| FDA | 3x3 | 0.5 | 0.95 | 9   | 27  | 0.11  |
| FDA | 3x3 | 0.5 | 0.95 | 15  | 45  | 0.302 |
| FDA | 3x3 | 0.5 | 0.95 | 24  | 72  | 0.635 |
| FDA | 3x3 | 0.5 | 0.95 | 30  | 90  | 0.783 |
| FDA | 3x3 | 0.5 | 0.95 | 36  | 108 | 0.867 |
| FDA | 3x3 | 0.5 | 0.95 | 39  | 117 | 0.891 |
| FDA | 3x3 | 0.5 | 0.95 | 42  | 126 | 0.909 |
| FDA | 3x3 | 0.5 | 0.95 | 48  | 144 | 0.937 |
| FDA | 3x3 | 0.5 | 0.95 | 54  | 162 | 0.971 |
| FDA | 3x3 | 0.5 | 0.95 | 57  | 171 | 0.966 |
| FDA | 3x3 | 0.5 | 0.95 | 63  | 189 | 0.982 |
| FDA | 3x3 | 0.5 | 0.95 | 72  | 216 | 0.989 |
| FDA | 3x3 | 0.5 | 0.95 | 81  | 243 | 0.993 |
| FDA | 3x3 | 0.5 | 0.95 | 90  | 270 | 0.997 |
| FDA | 3x3 | 0.5 | 0.95 | 96  | 288 | 0.994 |
| FDA | 3x3 | 0.5 | 0.95 | 105 | 315 | 0.999 |



|     |     |     |      |     |     |       |
|-----|-----|-----|------|-----|-----|-------|
| FDA | 3x3 | 0.5 | 1    | 9   | 27  | 0.117 |
| FDA | 3x3 | 0.5 | 1    | 15  | 45  | 0.338 |
| FDA | 3x3 | 0.5 | 1    | 24  | 72  | 0.67  |
| FDA | 3x3 | 0.5 | 1    | 27  | 81  | 0.74  |
| FDA | 3x3 | 0.5 | 1    | 33  | 99  | 0.876 |
| FDA | 3x3 | 0.5 | 1    | 36  | 108 | 0.904 |
| FDA | 3x3 | 0.5 | 1    | 39  | 117 | 0.906 |
| FDA | 3x3 | 0.5 | 1    | 42  | 126 | 0.945 |
| FDA | 3x3 | 0.5 | 1    | 48  | 144 | 0.97  |
| FDA | 3x3 | 0.5 | 1    | 54  | 162 | 0.986 |
| FDA | 3x3 | 0.5 | 1    | 57  | 171 | 0.988 |
| FDA | 3x3 | 0.5 | 1    | 63  | 189 | 0.989 |
| FDA | 3x3 | 0.5 | 1    | 72  | 216 | 0.997 |
| FDA | 3x3 | 0.5 | 1    | 81  | 243 | 0.997 |
| FDA | 3x3 | 0.5 | 1    | 90  | 270 | 0.999 |
| FDA | 3x3 | 0.5 | 1    | 96  | 288 | 0.998 |
| FDA | 3x3 | 0.5 | 1    | 105 | 315 | 1     |
| FDA | 3x3 | 0.5 | 1.05 | 9   | 27  | 0.091 |
| FDA | 3x3 | 0.5 | 1.05 | 15  | 45  | 0.289 |
| FDA | 3x3 | 0.5 | 1.05 | 24  | 72  | 0.652 |
| FDA | 3x3 | 0.5 | 1.05 | 30  | 90  | 0.781 |
| FDA | 3x3 | 0.5 | 1.05 | 33  | 99  | 0.82  |
| FDA | 3x3 | 0.5 | 1.05 | 39  | 117 | 0.884 |
| FDA | 3x3 | 0.5 | 1.05 | 42  | 126 | 0.915 |
| FDA | 3x3 | 0.5 | 1.05 | 48  | 144 | 0.949 |
| FDA | 3x3 | 0.5 | 1.05 | 54  | 162 | 0.958 |
| FDA | 3x3 | 0.5 | 1.05 | 57  | 171 | 0.971 |
| FDA | 3x3 | 0.5 | 1.05 | 63  | 189 | 0.98  |
| FDA | 3x3 | 0.5 | 1.05 | 72  | 216 | 0.988 |
| FDA | 3x3 | 0.5 | 1.05 | 81  | 243 | 0.993 |
| FDA | 3x3 | 0.5 | 1.05 | 90  | 270 | 0.989 |
| FDA | 3x3 | 0.5 | 1.05 | 96  | 288 | 0.995 |
| FDA | 3x3 | 0.5 | 1.05 | 105 | 315 | 0.995 |
| FDA | 3x3 | 0.5 | 1.1  | 9   | 27  | 0.091 |
| FDA | 3x3 | 0.5 | 1.1  | 15  | 45  | 0.291 |
| FDA | 3x3 | 0.5 | 1.1  | 24  | 72  | 0.596 |
| FDA | 3x3 | 0.5 | 1.1  | 30  | 90  | 0.687 |
| FDA | 3x3 | 0.5 | 1.1  | 39  | 117 | 0.824 |
| FDA | 3x3 | 0.5 | 1.1  | 45  | 135 | 0.861 |
| FDA | 3x3 | 0.5 | 1.1  | 48  | 144 | 0.876 |
| FDA | 3x3 | 0.5 | 1.1  | 51  | 153 | 0.886 |

|     |     |     |      |     |     |       |
|-----|-----|-----|------|-----|-----|-------|
| FDA | 3x3 | 0.5 | 1.1  | 54  | 162 | 0.898 |
| FDA | 3x3 | 0.5 | 1.1  | 57  | 171 | 0.907 |
| FDA | 3x3 | 0.5 | 1.1  | 63  | 189 | 0.938 |
| FDA | 3x3 | 0.5 | 1.1  | 72  | 216 | 0.954 |
| FDA | 3x3 | 0.5 | 1.1  | 81  | 243 | 0.958 |
| FDA | 3x3 | 0.5 | 1.1  | 90  | 270 | 0.972 |
| FDA | 3x3 | 0.5 | 1.1  | 96  | 288 | 0.979 |
| FDA | 3x3 | 0.5 | 1.1  | 105 | 315 | 0.976 |
| FDA | 3x3 | 0.6 | 0.9  | 9   | 27  | 0.108 |
| FDA | 3x3 | 0.6 | 0.9  | 15  | 45  | 0.318 |
| FDA | 3x3 | 0.6 | 0.9  | 18  | 54  | 0.437 |
| FDA | 3x3 | 0.6 | 0.9  | 24  | 72  | 0.599 |
| FDA | 3x3 | 0.6 | 0.9  | 30  | 90  | 0.704 |
| FDA | 3x3 | 0.6 | 0.9  | 36  | 108 | 0.804 |
| FDA | 3x3 | 0.6 | 0.9  | 42  | 126 | 0.849 |
| FDA | 3x3 | 0.6 | 0.9  | 48  | 144 | 0.867 |
| FDA | 3x3 | 0.6 | 0.9  | 54  | 162 | 0.9   |
| FDA | 3x3 | 0.6 | 0.9  | 60  | 180 | 0.897 |
| FDA | 3x3 | 0.6 | 0.9  | 66  | 198 | 0.929 |
| FDA | 3x3 | 0.6 | 0.9  | 72  | 216 | 0.935 |
| FDA | 3x3 | 0.6 | 0.9  | 81  | 243 | 0.955 |
| FDA | 3x3 | 0.6 | 0.9  | 90  | 270 | 0.944 |
| FDA | 3x3 | 0.6 | 0.9  | 96  | 288 | 0.967 |
| FDA | 3x3 | 0.6 | 0.9  | 105 | 315 | 0.971 |
| FDA | 3x3 | 0.6 | 0.95 | 9   | 27  | 0.121 |
| FDA | 3x3 | 0.6 | 0.95 | 15  | 45  | 0.335 |
| FDA | 3x3 | 0.6 | 0.95 | 18  | 54  | 0.457 |
| FDA | 3x3 | 0.6 | 0.95 | 24  | 72  | 0.71  |
| FDA | 3x3 | 0.6 | 0.95 | 30  | 90  | 0.816 |
| FDA | 3x3 | 0.6 | 0.95 | 36  | 108 | 0.862 |
| FDA | 3x3 | 0.6 | 0.95 | 39  | 117 | 0.897 |
| FDA | 3x3 | 0.6 | 0.95 | 45  | 135 | 0.931 |
| FDA | 3x3 | 0.6 | 0.95 | 48  | 144 | 0.936 |
| FDA | 3x3 | 0.6 | 0.95 | 54  | 162 | 0.958 |
| FDA | 3x3 | 0.6 | 0.95 | 60  | 180 | 0.975 |
| FDA | 3x3 | 0.6 | 0.95 | 66  | 198 | 0.97  |
| FDA | 3x3 | 0.6 | 0.95 | 72  | 216 | 0.981 |
| FDA | 3x3 | 0.6 | 0.95 | 81  | 243 | 0.988 |
| FDA | 3x3 | 0.6 | 0.95 | 90  | 270 | 0.993 |
| FDA | 3x3 | 0.6 | 0.95 | 96  | 288 | 0.991 |
| FDA | 3x3 | 0.6 | 0.95 | 105 | 315 | 0.994 |

|     |     |     |      |     |     |       |
|-----|-----|-----|------|-----|-----|-------|
| FDA | 3x3 | 0.6 | 1    | 9   | 27  | 0.114 |
| FDA | 3x3 | 0.6 | 1    | 15  | 45  | 0.37  |
| FDA | 3x3 | 0.6 | 1    | 18  | 54  | 0.521 |
| FDA | 3x3 | 0.6 | 1    | 24  | 72  | 0.704 |
| FDA | 3x3 | 0.6 | 1    | 30  | 90  | 0.834 |
| FDA | 3x3 | 0.6 | 1    | 33  | 99  | 0.881 |
| FDA | 3x3 | 0.6 | 1    | 36  | 108 | 0.902 |
| FDA | 3x3 | 0.6 | 1    | 42  | 126 | 0.935 |
| FDA | 3x3 | 0.6 | 1    | 48  | 144 | 0.96  |
| FDA | 3x3 | 0.6 | 1    | 54  | 162 | 0.982 |
| FDA | 3x3 | 0.6 | 1    | 60  | 180 | 0.983 |
| FDA | 3x3 | 0.6 | 1    | 66  | 198 | 0.979 |
| FDA | 3x3 | 0.6 | 1    | 72  | 216 | 0.991 |
| FDA | 3x3 | 0.6 | 1    | 81  | 243 | 0.993 |
| FDA | 3x3 | 0.6 | 1    | 90  | 270 | 0.997 |
| FDA | 3x3 | 0.6 | 1    | 96  | 288 | 0.998 |
| FDA | 3x3 | 0.6 | 1    | 105 | 315 | 0.996 |
| FDA | 3x3 | 0.6 | 1.05 | 9   | 27  | 0.102 |
| FDA | 3x3 | 0.6 | 1.05 | 15  | 45  | 0.344 |
| FDA | 3x3 | 0.6 | 1.05 | 18  | 54  | 0.467 |
| FDA | 3x3 | 0.6 | 1.05 | 24  | 72  | 0.719 |
| FDA | 3x3 | 0.6 | 1.05 | 30  | 90  | 0.803 |
| FDA | 3x3 | 0.6 | 1.05 | 33  | 99  | 0.843 |
| FDA | 3x3 | 0.6 | 1.05 | 36  | 108 | 0.867 |
| FDA | 3x3 | 0.6 | 1.05 | 42  | 126 | 0.907 |
| FDA | 3x3 | 0.6 | 1.05 | 48  | 144 | 0.933 |
| FDA | 3x3 | 0.6 | 1.05 | 54  | 162 | 0.95  |
| FDA | 3x3 | 0.6 | 1.05 | 60  | 180 | 0.969 |
| FDA | 3x3 | 0.6 | 1.05 | 66  | 198 | 0.977 |
| FDA | 3x3 | 0.6 | 1.05 | 72  | 216 | 0.976 |
| FDA | 3x3 | 0.6 | 1.05 | 81  | 243 | 0.986 |
| FDA | 3x3 | 0.6 | 1.05 | 90  | 270 | 0.983 |
| FDA | 3x3 | 0.6 | 1.05 | 96  | 288 | 0.989 |
| FDA | 3x3 | 0.6 | 1.05 | 105 | 315 | 0.994 |
| FDA | 3x3 | 0.6 | 1.1  | 9   | 27  | 0.122 |
| FDA | 3x3 | 0.6 | 1.1  | 15  | 45  | 0.33  |
| FDA | 3x3 | 0.6 | 1.1  | 24  | 72  | 0.618 |
| FDA | 3x3 | 0.6 | 1.1  | 30  | 90  | 0.749 |
| FDA | 3x3 | 0.6 | 1.1  | 39  | 117 | 0.833 |
| FDA | 3x3 | 0.6 | 1.1  | 42  | 126 | 0.855 |
| FDA | 3x3 | 0.6 | 1.1  | 45  | 135 | 0.844 |

|     |     |     |      |     |     |       |
|-----|-----|-----|------|-----|-----|-------|
| FDA | 3x3 | 0.6 | 1.1  | 54  | 162 | 0.915 |
| FDA | 3x3 | 0.6 | 1.1  | 60  | 180 | 0.915 |
| FDA | 3x3 | 0.6 | 1.1  | 66  | 198 | 0.928 |
| FDA | 3x3 | 0.6 | 1.1  | 72  | 216 | 0.939 |
| FDA | 3x3 | 0.6 | 1.1  | 81  | 243 | 0.96  |
| FDA | 3x3 | 0.6 | 1.1  | 90  | 270 | 0.958 |
| FDA | 3x3 | 0.6 | 1.1  | 96  | 288 | 0.943 |
| FDA | 3x3 | 0.6 | 1.1  | 105 | 315 | 0.974 |
| FDA | 2x4 | 0.2 | 0.9  | 6   | 24  | 0.018 |
| FDA | 2x4 | 0.2 | 0.9  | 8   | 32  | 0.025 |
| FDA | 2x4 | 0.2 | 0.9  | 12  | 48  | 0.116 |
| FDA | 2x4 | 0.2 | 0.9  | 14  | 56  | 0.157 |
| FDA | 2x4 | 0.2 | 0.9  | 16  | 64  | 0.206 |
| FDA | 2x4 | 0.2 | 0.9  | 18  | 72  | 0.274 |
| FDA | 2x4 | 0.2 | 0.9  | 20  | 80  | 0.329 |
| FDA | 2x4 | 0.2 | 0.9  | 24  | 96  | 0.382 |
| FDA | 2x4 | 0.2 | 0.9  | 30  | 120 | 0.489 |
| FDA | 2x4 | 0.2 | 0.9  | 34  | 136 | 0.516 |
| FDA | 2x4 | 0.2 | 0.9  | 40  | 160 | 0.627 |
| FDA | 2x4 | 0.2 | 0.9  | 46  | 184 | 0.667 |
| FDA | 2x4 | 0.2 | 0.9  | 50  | 200 | 0.711 |
| FDA | 2x4 | 0.2 | 0.9  | 54  | 216 | 0.767 |
| FDA | 2x4 | 0.2 | 0.9  | 60  | 240 | 0.798 |
| FDA | 2x4 | 0.2 | 0.9  | 66  | 264 | 0.825 |
| FDA | 2x4 | 0.2 | 0.9  | 72  | 288 | 0.86  |
| FDA | 2x4 | 0.2 | 0.9  | 80  | 320 | 0.913 |
| FDA | 2x4 | 0.2 | 0.95 | 6   | 24  | 0.019 |
| FDA | 2x4 | 0.2 | 0.95 | 8   | 32  | 0.041 |
| FDA | 2x4 | 0.2 | 0.95 | 10  | 40  | 0.086 |
| FDA | 2x4 | 0.2 | 0.95 | 14  | 56  | 0.207 |
| FDA | 2x4 | 0.2 | 0.95 | 16  | 64  | 0.316 |
| FDA | 2x4 | 0.2 | 0.95 | 18  | 72  | 0.372 |
| FDA | 2x4 | 0.2 | 0.95 | 20  | 80  | 0.464 |
| FDA | 2x4 | 0.2 | 0.95 | 24  | 96  | 0.577 |
| FDA | 2x4 | 0.2 | 0.95 | 30  | 120 | 0.747 |
| FDA | 2x4 | 0.2 | 0.95 | 34  | 136 | 0.802 |
| FDA | 2x4 | 0.2 | 0.95 | 40  | 160 | 0.874 |
| FDA | 2x4 | 0.2 | 0.95 | 46  | 184 | 0.911 |
| FDA | 2x4 | 0.2 | 0.95 | 50  | 200 | 0.953 |
| FDA | 2x4 | 0.2 | 0.95 | 54  | 216 | 0.947 |
| FDA | 2x4 | 0.2 | 0.95 | 60  | 240 | 0.972 |

|     |     |     |      |    |     |       |
|-----|-----|-----|------|----|-----|-------|
| FDA | 2x4 | 0.2 | 0.95 | 66 | 264 | 0.972 |
| FDA | 2x4 | 0.2 | 0.95 | 72 | 288 | 0.988 |
| FDA | 2x4 | 0.2 | 0.95 | 80 | 320 | 0.991 |
| FDA | 2x4 | 0.2 | 1    | 6  | 24  | 0.024 |
| FDA | 2x4 | 0.2 | 1    | 8  | 32  | 0.043 |
| FDA | 2x4 | 0.2 | 1    | 10 | 40  | 0.099 |
| FDA | 2x4 | 0.2 | 1    | 14 | 56  | 0.222 |
| FDA | 2x4 | 0.2 | 1    | 18 | 72  | 0.429 |
| FDA | 2x4 | 0.2 | 1    | 20 | 80  | 0.507 |
| FDA | 2x4 | 0.2 | 1    | 24 | 96  | 0.661 |
| FDA | 2x4 | 0.2 | 1    | 30 | 120 | 0.829 |
| FDA | 2x4 | 0.2 | 1    | 34 | 136 | 0.86  |
| FDA | 2x4 | 0.2 | 1    | 40 | 160 | 0.924 |
| FDA | 2x4 | 0.2 | 1    | 46 | 184 | 0.953 |
| FDA | 2x4 | 0.2 | 1    | 50 | 200 | 0.981 |
| FDA | 2x4 | 0.2 | 1    | 54 | 216 | 0.983 |
| FDA | 2x4 | 0.2 | 1    | 60 | 240 | 0.995 |
| FDA | 2x4 | 0.2 | 1    | 66 | 264 | 0.996 |
| FDA | 2x4 | 0.2 | 1    | 72 | 288 | 0.999 |
| FDA | 2x4 | 0.2 | 1    | 80 | 320 | 0.999 |
| FDA | 2x4 | 0.2 | 1.05 | 6  | 24  | 0.023 |
| FDA | 2x4 | 0.2 | 1.05 | 8  | 32  | 0.047 |
| FDA | 2x4 | 0.2 | 1.05 | 12 | 48  | 0.144 |
| FDA | 2x4 | 0.2 | 1.05 | 14 | 56  | 0.203 |
| FDA | 2x4 | 0.2 | 1.05 | 16 | 64  | 0.29  |
| FDA | 2x4 | 0.2 | 1.05 | 18 | 72  | 0.36  |
| FDA | 2x4 | 0.2 | 1.05 | 20 | 80  | 0.446 |
| FDA | 2x4 | 0.2 | 1.05 | 24 | 96  | 0.577 |
| FDA | 2x4 | 0.2 | 1.05 | 30 | 120 | 0.732 |
| FDA | 2x4 | 0.2 | 1.05 | 34 | 136 | 0.744 |
| FDA | 2x4 | 0.2 | 1.05 | 40 | 160 | 0.813 |
| FDA | 2x4 | 0.2 | 1.05 | 46 | 184 | 0.89  |
| FDA | 2x4 | 0.2 | 1.05 | 50 | 200 | 0.896 |
| FDA | 2x4 | 0.2 | 1.05 | 54 | 216 | 0.905 |
| FDA | 2x4 | 0.2 | 1.05 | 60 | 240 | 0.931 |
| FDA | 2x4 | 0.2 | 1.05 | 66 | 264 | 0.968 |
| FDA | 2x4 | 0.2 | 1.05 | 72 | 288 | 0.97  |
| FDA | 2x4 | 0.2 | 1.05 | 80 | 320 | 0.977 |
| FDA | 2x4 | 0.2 | 1.1  | 6  | 24  | 0.019 |
| FDA | 2x4 | 0.2 | 1.1  | 8  | 32  | 0.035 |
| FDA | 2x4 | 0.2 | 1.1  | 10 | 40  | 0.074 |

|     |     |     |      |    |     |       |
|-----|-----|-----|------|----|-----|-------|
| FDA | 2x4 | 0.2 | 1.1  | 14 | 56  | 0.152 |
| FDA | 2x4 | 0.2 | 1.1  | 16 | 64  | 0.206 |
| FDA | 2x4 | 0.2 | 1.1  | 18 | 72  | 0.28  |
| FDA | 2x4 | 0.2 | 1.1  | 20 | 80  | 0.307 |
| FDA | 2x4 | 0.2 | 1.1  | 22 | 88  | 0.346 |
| FDA | 2x4 | 0.2 | 1.1  | 30 | 120 | 0.483 |
| FDA | 2x4 | 0.2 | 1.1  | 34 | 136 | 0.512 |
| FDA | 2x4 | 0.2 | 1.1  | 40 | 160 | 0.591 |
| FDA | 2x4 | 0.2 | 1.1  | 46 | 184 | 0.682 |
| FDA | 2x4 | 0.2 | 1.1  | 50 | 200 | 0.722 |
| FDA | 2x4 | 0.2 | 1.1  | 54 | 216 | 0.731 |
| FDA | 2x4 | 0.2 | 1.1  | 60 | 240 | 0.753 |
| FDA | 2x4 | 0.2 | 1.1  | 66 | 264 | 0.816 |
| FDA | 2x4 | 0.2 | 1.1  | 72 | 288 | 0.838 |
| FDA | 2x4 | 0.2 | 1.1  | 80 | 320 | 0.869 |
| FDA | 2x4 | 0.3 | 0.9  | 6  | 24  | 0.022 |
| FDA | 2x4 | 0.3 | 0.9  | 12 | 48  | 0.12  |
| FDA | 2x4 | 0.3 | 0.9  | 18 | 72  | 0.251 |
| FDA | 2x4 | 0.3 | 0.9  | 24 | 96  | 0.424 |
| FDA | 2x4 | 0.3 | 0.9  | 30 | 120 | 0.509 |
| FDA | 2x4 | 0.3 | 0.9  | 36 | 144 | 0.59  |
| FDA | 2x4 | 0.3 | 0.9  | 40 | 160 | 0.6   |
| FDA | 2x4 | 0.3 | 0.9  | 44 | 176 | 0.644 |
| FDA | 2x4 | 0.3 | 0.9  | 50 | 200 | 0.694 |
| FDA | 2x4 | 0.3 | 0.9  | 54 | 216 | 0.75  |
| FDA | 2x4 | 0.3 | 0.9  | 60 | 240 | 0.784 |
| FDA | 2x4 | 0.3 | 0.9  | 66 | 264 | 0.813 |
| FDA | 2x4 | 0.3 | 0.9  | 72 | 288 | 0.853 |
| FDA | 2x4 | 0.3 | 0.9  | 80 | 320 | 0.89  |
| FDA | 2x4 | 0.3 | 0.95 | 6  | 24  | 0.034 |
| FDA | 2x4 | 0.3 | 0.95 | 8  | 32  | 0.064 |
| FDA | 2x4 | 0.3 | 0.95 | 12 | 48  | 0.194 |
| FDA | 2x4 | 0.3 | 0.95 | 14 | 56  | 0.222 |
| FDA | 2x4 | 0.3 | 0.95 | 16 | 64  | 0.296 |
| FDA | 2x4 | 0.3 | 0.95 | 18 | 72  | 0.341 |
| FDA | 2x4 | 0.3 | 0.95 | 20 | 80  | 0.47  |
| FDA | 2x4 | 0.3 | 0.95 | 26 | 104 | 0.626 |
| FDA | 2x4 | 0.3 | 0.95 | 30 | 120 | 0.712 |
| FDA | 2x4 | 0.3 | 0.95 | 36 | 144 | 0.825 |
| FDA | 2x4 | 0.3 | 0.95 | 40 | 160 | 0.83  |
| FDA | 2x4 | 0.3 | 0.95 | 44 | 176 | 0.875 |

|     |     |     |      |    |     |       |
|-----|-----|-----|------|----|-----|-------|
| FDA | 2x4 | 0.3 | 0.95 | 50 | 200 | 0.905 |
| FDA | 2x4 | 0.3 | 0.95 | 54 | 216 | 0.926 |
| FDA | 2x4 | 0.3 | 0.95 | 60 | 240 | 0.958 |
| FDA | 2x4 | 0.3 | 0.95 | 66 | 264 | 0.958 |
| FDA | 2x4 | 0.3 | 0.95 | 72 | 288 | 0.974 |
| FDA | 2x4 | 0.3 | 0.95 | 80 | 320 | 0.982 |
| FDA | 2x4 | 0.3 | 1    | 6  | 24  | 0.041 |
| FDA | 2x4 | 0.3 | 1    | 8  | 32  | 0.058 |
| FDA | 2x4 | 0.3 | 1    | 12 | 48  | 0.15  |
| FDA | 2x4 | 0.3 | 1    | 14 | 56  | 0.234 |
| FDA | 2x4 | 0.3 | 1    | 16 | 64  | 0.308 |
| FDA | 2x4 | 0.3 | 1    | 18 | 72  | 0.399 |
| FDA | 2x4 | 0.3 | 1    | 20 | 80  | 0.471 |
| FDA | 2x4 | 0.3 | 1    | 22 | 88  | 0.557 |
| FDA | 2x4 | 0.3 | 1    | 30 | 120 | 0.764 |
| FDA | 2x4 | 0.3 | 1    | 36 | 144 | 0.855 |
| FDA | 2x4 | 0.3 | 1    | 40 | 160 | 0.89  |
| FDA | 2x4 | 0.3 | 1    | 44 | 176 | 0.93  |
| FDA | 2x4 | 0.3 | 1    | 50 | 200 | 0.949 |
| FDA | 2x4 | 0.3 | 1    | 54 | 216 | 0.965 |
| FDA | 2x4 | 0.3 | 1    | 60 | 240 | 0.982 |
| FDA | 2x4 | 0.3 | 1    | 66 | 264 | 0.992 |
| FDA | 2x4 | 0.3 | 1    | 72 | 288 | 0.993 |
| FDA | 2x4 | 0.3 | 1    | 80 | 320 | 0.996 |
| FDA | 2x4 | 0.3 | 1.05 | 6  | 24  | 0.031 |
| FDA | 2x4 | 0.3 | 1.05 | 8  | 32  | 0.053 |
| FDA | 2x4 | 0.3 | 1.05 | 12 | 48  | 0.169 |
| FDA | 2x4 | 0.3 | 1.05 | 14 | 56  | 0.227 |
| FDA | 2x4 | 0.3 | 1.05 | 16 | 64  | 0.29  |
| FDA | 2x4 | 0.3 | 1.05 | 18 | 72  | 0.372 |
| FDA | 2x4 | 0.3 | 1.05 | 20 | 80  | 0.405 |
| FDA | 2x4 | 0.3 | 1.05 | 24 | 96  | 0.58  |
| FDA | 2x4 | 0.3 | 1.05 | 26 | 104 | 0.615 |
| FDA | 2x4 | 0.3 | 1.05 | 30 | 120 | 0.714 |
| FDA | 2x4 | 0.3 | 1.05 | 36 | 144 | 0.779 |
| FDA | 2x4 | 0.3 | 1.05 | 40 | 160 | 0.815 |
| FDA | 2x4 | 0.3 | 1.05 | 44 | 176 | 0.854 |
| FDA | 2x4 | 0.3 | 1.05 | 50 | 200 | 0.896 |
| FDA | 2x4 | 0.3 | 1.05 | 54 | 216 | 0.903 |
| FDA | 2x4 | 0.3 | 1.05 | 60 | 240 | 0.922 |
| FDA | 2x4 | 0.3 | 1.05 | 66 | 264 | 0.943 |

|     |     |     |      |    |     |       |
|-----|-----|-----|------|----|-----|-------|
| FDA | 2x4 | 0.3 | 1.05 | 72 | 288 | 0.962 |
| FDA | 2x4 | 0.3 | 1.05 | 80 | 320 | 0.974 |
| FDA | 2x4 | 0.3 | 1.1  | 6  | 24  | 0.031 |
| FDA | 2x4 | 0.3 | 1.1  | 12 | 48  | 0.136 |
| FDA | 2x4 | 0.3 | 1.1  | 18 | 72  | 0.303 |
| FDA | 2x4 | 0.3 | 1.1  | 24 | 96  | 0.408 |
| FDA | 2x4 | 0.3 | 1.1  | 30 | 120 | 0.532 |
| FDA | 2x4 | 0.3 | 1.1  | 34 | 136 | 0.569 |
| FDA | 2x4 | 0.3 | 1.1  | 38 | 152 | 0.602 |
| FDA | 2x4 | 0.3 | 1.1  | 42 | 168 | 0.668 |
| FDA | 2x4 | 0.3 | 1.1  | 46 | 184 | 0.692 |
| FDA | 2x4 | 0.3 | 1.1  | 50 | 200 | 0.717 |
| FDA | 2x4 | 0.3 | 1.1  | 36 | 144 | 0.592 |
| FDA | 2x4 | 0.3 | 1.1  | 40 | 160 | 0.629 |
| FDA | 2x4 | 0.3 | 1.1  | 44 | 176 | 0.685 |
| FDA | 2x4 | 0.3 | 1.1  | 50 | 200 | 0.696 |
| FDA | 2x4 | 0.3 | 1.1  | 54 | 216 | 0.744 |
| FDA | 2x4 | 0.3 | 1.1  | 60 | 240 | 0.794 |
| FDA | 2x4 | 0.3 | 1.1  | 66 | 264 | 0.796 |
| FDA | 2x4 | 0.3 | 1.1  | 72 | 288 | 0.831 |
| FDA | 2x4 | 0.3 | 1.1  | 80 | 320 | 0.89  |
| FDA | 2x4 | 0.4 | 0.9  | 6  | 24  | 0.039 |
| FDA | 2x4 | 0.4 | 0.9  | 12 | 48  | 0.213 |
| FDA | 2x4 | 0.4 | 0.9  | 18 | 72  | 0.437 |
| FDA | 2x4 | 0.4 | 0.9  | 24 | 96  | 0.589 |
| FDA | 2x4 | 0.4 | 0.9  | 28 | 112 | 0.677 |
| FDA | 2x4 | 0.4 | 0.9  | 32 | 128 | 0.752 |
| FDA | 2x4 | 0.4 | 0.9  | 34 | 136 | 0.746 |
| FDA | 2x4 | 0.4 | 0.9  | 38 | 152 | 0.804 |
| FDA | 2x4 | 0.4 | 0.9  | 42 | 168 | 0.847 |
| FDA | 2x4 | 0.4 | 0.9  | 48 | 192 | 0.885 |
| FDA | 2x4 | 0.4 | 0.9  | 54 | 216 | 0.926 |
| FDA | 2x4 | 0.4 | 0.9  | 60 | 240 | 0.942 |
| FDA | 2x4 | 0.4 | 0.9  | 66 | 264 | 0.944 |
| FDA | 2x4 | 0.4 | 0.9  | 72 | 288 | 0.974 |
| FDA | 2x4 | 0.4 | 0.9  | 80 | 320 | 0.976 |
| FDA | 2x4 | 0.4 | 0.95 | 6  | 24  | 0.06  |
| FDA | 2x4 | 0.4 | 0.95 | 12 | 48  | 0.261 |
| FDA | 2x4 | 0.4 | 0.95 | 18 | 72  | 0.51  |
| FDA | 2x4 | 0.4 | 0.95 | 20 | 80  | 0.608 |
| FDA | 2x4 | 0.4 | 0.95 | 22 | 88  | 0.649 |



|     |     |     |      |    |     |       |
|-----|-----|-----|------|----|-----|-------|
| FDA | 2x4 | 0.4 | 0.95 | 26 | 104 | 0.76  |
| FDA | 2x4 | 0.4 | 0.95 | 28 | 112 | 0.787 |
| FDA | 2x4 | 0.4 | 0.95 | 32 | 128 | 0.872 |
| FDA | 2x4 | 0.4 | 0.95 | 34 | 136 | 0.874 |
| FDA | 2x4 | 0.4 | 0.95 | 38 | 152 | 0.916 |
| FDA | 2x4 | 0.4 | 0.95 | 42 | 168 | 0.939 |
| FDA | 2x4 | 0.4 | 0.95 | 48 | 192 | 0.968 |
| FDA | 2x4 | 0.4 | 0.95 | 54 | 216 | 0.981 |
| FDA | 2x4 | 0.4 | 0.95 | 60 | 240 | 0.989 |
| FDA | 2x4 | 0.4 | 0.95 | 66 | 264 | 0.996 |
| FDA | 2x4 | 0.4 | 0.95 | 72 | 288 | 0.995 |
| FDA | 2x4 | 0.4 | 0.95 | 80 | 320 | 0.998 |
| FDA | 2x4 | 0.4 | 1    | 6  | 24  | 0.058 |
| FDA | 2x4 | 0.4 | 1    | 12 | 48  | 0.265 |
| FDA | 2x4 | 0.4 | 1    | 18 | 72  | 0.557 |
| FDA | 2x4 | 0.4 | 1    | 20 | 80  | 0.638 |
| FDA | 2x4 | 0.4 | 1    | 24 | 96  | 0.75  |
| FDA | 2x4 | 0.4 | 1    | 28 | 112 | 0.827 |
| FDA | 2x4 | 0.4 | 1    | 32 | 128 | 0.871 |
| FDA | 2x4 | 0.4 | 1    | 34 | 136 | 0.909 |
| FDA | 2x4 | 0.4 | 1    | 38 | 152 | 0.944 |
| FDA | 2x4 | 0.4 | 1    | 42 | 168 | 0.966 |
| FDA | 2x4 | 0.4 | 1    | 48 | 192 | 0.986 |
| FDA | 2x4 | 0.4 | 1    | 54 | 216 | 0.989 |
| FDA | 2x4 | 0.4 | 1    | 60 | 240 | 0.998 |
| FDA | 2x4 | 0.4 | 1    | 66 | 264 | 1     |
| FDA | 2x4 | 0.4 | 1    | 72 | 288 | 1     |
| FDA | 2x4 | 0.4 | 1    | 80 | 320 | 1     |
| FDA | 2x4 | 0.4 | 1.05 | 6  | 24  | 0.06  |
| FDA | 2x4 | 0.4 | 1.05 | 12 | 48  | 0.247 |
| FDA | 2x4 | 0.4 | 1.05 | 18 | 72  | 0.518 |
| FDA | 2x4 | 0.4 | 1.05 | 20 | 80  | 0.567 |
| FDA | 2x4 | 0.4 | 1.05 | 22 | 88  | 0.636 |
| FDA | 2x4 | 0.4 | 1.05 | 26 | 104 | 0.751 |
| FDA | 2x4 | 0.4 | 1.05 | 30 | 120 | 0.824 |
| FDA | 2x4 | 0.4 | 1.05 | 32 | 128 | 0.849 |
| FDA | 2x4 | 0.4 | 1.05 | 34 | 136 | 0.881 |
| FDA | 2x4 | 0.4 | 1.05 | 38 | 152 | 0.918 |
| FDA | 2x4 | 0.4 | 1.05 | 42 | 168 | 0.945 |
| FDA | 2x4 | 0.4 | 1.05 | 48 | 192 | 0.962 |
| FDA | 2x4 | 0.4 | 1.05 | 54 | 216 | 0.967 |

|     |     |     |      |    |     |       |
|-----|-----|-----|------|----|-----|-------|
| FDA | 2x4 | 0.4 | 1.05 | 60 | 240 | 0.992 |
| FDA | 2x4 | 0.4 | 1.05 | 66 | 264 | 0.988 |
| FDA | 2x4 | 0.4 | 1.05 | 72 | 288 | 0.997 |
| FDA | 2x4 | 0.4 | 1.05 | 80 | 320 | 0.998 |
| FDA | 2x4 | 0.4 | 1.1  | 6  | 24  | 0.041 |
| FDA | 2x4 | 0.4 | 1.1  | 12 | 48  | 0.226 |
| FDA | 2x4 | 0.4 | 1.1  | 18 | 72  | 0.424 |
| FDA | 2x4 | 0.4 | 1.1  | 24 | 96  | 0.59  |
| FDA | 2x4 | 0.4 | 1.1  | 28 | 112 | 0.665 |
| FDA | 2x4 | 0.4 | 1.1  | 32 | 128 | 0.73  |
| FDA | 2x4 | 0.4 | 1.1  | 36 | 144 | 0.789 |
| FDA | 2x4 | 0.4 | 1.1  | 40 | 160 | 0.834 |
| FDA | 2x4 | 0.4 | 1.1  | 44 | 176 | 0.864 |
| FDA | 2x4 | 0.4 | 1.1  | 48 | 192 | 0.899 |
| FDA | 2x4 | 0.4 | 1.1  | 54 | 216 | 0.934 |
| FDA | 2x4 | 0.4 | 1.1  | 60 | 240 | 0.958 |
| FDA | 2x4 | 0.4 | 1.1  | 66 | 264 | 0.964 |
| FDA | 2x4 | 0.4 | 1.1  | 72 | 288 | 0.966 |
| FDA | 2x4 | 0.4 | 1.1  | 80 | 320 | 0.976 |
| FDA | 2x4 | 0.5 | 0.9  | 6  | 24  | 0.071 |
| FDA | 2x4 | 0.5 | 0.9  | 12 | 48  | 0.308 |
| FDA | 2x4 | 0.5 | 0.9  | 18 | 72  | 0.561 |
| FDA | 2x4 | 0.5 | 0.9  | 24 | 96  | 0.688 |
| FDA | 2x4 | 0.5 | 0.9  | 28 | 112 | 0.766 |
| FDA | 2x4 | 0.5 | 0.9  | 32 | 128 | 0.831 |
| FDA | 2x4 | 0.5 | 0.9  | 36 | 144 | 0.853 |
| FDA | 2x4 | 0.5 | 0.9  | 40 | 160 | 0.888 |
| FDA | 2x4 | 0.5 | 0.9  | 44 | 176 | 0.901 |
| FDA | 2x4 | 0.5 | 0.9  | 48 | 192 | 0.922 |
| FDA | 2x4 | 0.5 | 0.9  | 54 | 216 | 0.94  |
| FDA | 2x4 | 0.5 | 0.9  | 60 | 240 | 0.957 |
| FDA | 2x4 | 0.5 | 0.9  | 66 | 264 | 0.971 |
| FDA | 2x4 | 0.5 | 0.9  | 72 | 288 | 0.986 |
| FDA | 2x4 | 0.5 | 0.9  | 80 | 320 | 0.983 |
| FDA | 2x4 | 0.5 | 0.95 | 6  | 24  | 0.067 |
| FDA | 2x4 | 0.5 | 0.95 | 12 | 48  | 0.349 |
| FDA | 2x4 | 0.5 | 0.95 | 18 | 72  | 0.611 |
| FDA | 2x4 | 0.5 | 0.95 | 22 | 88  | 0.739 |
| FDA | 2x4 | 0.5 | 0.95 | 26 | 104 | 0.819 |
| FDA | 2x4 | 0.5 | 0.95 | 28 | 112 | 0.871 |
| FDA | 2x4 | 0.5 | 0.95 | 32 | 128 | 0.911 |

|     |     |     |      |    |     |       |
|-----|-----|-----|------|----|-----|-------|
| FDA | 2x4 | 0.5 | 0.95 | 36 | 144 | 0.937 |
| FDA | 2x4 | 0.5 | 0.95 | 40 | 160 | 0.96  |
| FDA | 2x4 | 0.5 | 0.95 | 44 | 176 | 0.966 |
| FDA | 2x4 | 0.5 | 0.95 | 48 | 192 | 0.971 |
| FDA | 2x4 | 0.5 | 0.95 | 54 | 216 | 0.986 |
| FDA | 2x4 | 0.5 | 0.95 | 60 | 240 | 0.99  |
| FDA | 2x4 | 0.5 | 0.95 | 66 | 264 | 0.994 |
| FDA | 2x4 | 0.5 | 0.95 | 72 | 288 | 0.996 |
| FDA | 2x4 | 0.5 | 0.95 | 80 | 320 | 0.999 |
| FDA | 2x4 | 0.5 | 1    | 6  | 24  | 0.075 |
| FDA | 2x4 | 0.5 | 1    | 12 | 48  | 0.353 |
| FDA | 2x4 | 0.5 | 1    | 18 | 72  | 0.653 |
| FDA | 2x4 | 0.5 | 1    | 20 | 80  | 0.698 |
| FDA | 2x4 | 0.5 | 1    | 24 | 96  | 0.827 |
| FDA | 2x4 | 0.5 | 1    | 26 | 104 | 0.844 |
| FDA | 2x4 | 0.5 | 1    | 28 | 112 | 0.882 |
| FDA | 2x4 | 0.5 | 1    | 32 | 128 | 0.924 |
| FDA | 2x4 | 0.5 | 1    | 36 | 144 | 0.944 |
| FDA | 2x4 | 0.5 | 1    | 40 | 160 | 0.976 |
| FDA | 2x4 | 0.5 | 1    | 44 | 176 | 0.987 |
| FDA | 2x4 | 0.5 | 1    | 48 | 192 | 0.988 |
| FDA | 2x4 | 0.5 | 1    | 54 | 216 | 0.996 |
| FDA | 2x4 | 0.5 | 1    | 60 | 240 | 0.998 |
| FDA | 2x4 | 0.5 | 1    | 66 | 264 | 0.995 |
| FDA | 2x4 | 0.5 | 1    | 72 | 288 | 1     |
| FDA | 2x4 | 0.5 | 1    | 80 | 320 | 0.999 |
| FDA | 2x4 | 0.5 | 1.05 | 6  | 24  | 0.068 |
| FDA | 2x4 | 0.5 | 1.05 | 12 | 48  | 0.361 |
| FDA | 2x4 | 0.5 | 1.05 | 18 | 72  | 0.615 |
| FDA | 2x4 | 0.5 | 1.05 | 22 | 88  | 0.735 |
| FDA | 2x4 | 0.5 | 1.05 | 24 | 96  | 0.776 |
| FDA | 2x4 | 0.5 | 1.05 | 28 | 112 | 0.85  |
| FDA | 2x4 | 0.5 | 1.05 | 32 | 128 | 0.892 |
| FDA | 2x4 | 0.5 | 1.05 | 36 | 144 | 0.922 |
| FDA | 2x4 | 0.5 | 1.05 | 40 | 160 | 0.946 |
| FDA | 2x4 | 0.5 | 1.05 | 44 | 176 | 0.965 |
| FDA | 2x4 | 0.5 | 1.05 | 48 | 192 | 0.977 |
| FDA | 2x4 | 0.5 | 1.05 | 54 | 216 | 0.982 |
| FDA | 2x4 | 0.5 | 1.05 | 60 | 240 | 0.989 |
| FDA | 2x4 | 0.5 | 1.05 | 66 | 264 | 0.994 |
| FDA | 2x4 | 0.5 | 1.05 | 72 | 288 | 0.996 |

|     |     |     |      |    |     |       |
|-----|-----|-----|------|----|-----|-------|
| FDA | 2x4 | 0.5 | 1.05 | 80 | 320 | 0.996 |
| FDA | 2x4 | 0.5 | 1.1  | 6  | 24  | 0.077 |
| FDA | 2x4 | 0.5 | 1.1  | 12 | 48  | 0.283 |
| FDA | 2x4 | 0.5 | 1.1  | 18 | 72  | 0.531 |
| FDA | 2x4 | 0.5 | 1.1  | 22 | 88  | 0.641 |
| FDA | 2x4 | 0.5 | 1.1  | 28 | 112 | 0.789 |
| FDA | 2x4 | 0.5 | 1.1  | 34 | 136 | 0.851 |
| FDA | 2x4 | 0.5 | 1.1  | 36 | 144 | 0.867 |
| FDA | 2x4 | 0.5 | 1.1  | 38 | 152 | 0.889 |
| FDA | 2x4 | 0.5 | 1.1  | 40 | 160 | 0.896 |
| FDA | 2x4 | 0.5 | 1.1  | 44 | 176 | 0.916 |
| FDA | 2x4 | 0.5 | 1.1  | 48 | 192 | 0.922 |
| FDA | 2x4 | 0.5 | 1.1  | 54 | 216 | 0.946 |
| FDA | 2x4 | 0.5 | 1.1  | 60 | 240 | 0.956 |
| FDA | 2x4 | 0.5 | 1.1  | 66 | 264 | 0.969 |
| FDA | 2x4 | 0.5 | 1.1  | 72 | 288 | 0.978 |
| FDA | 2x4 | 0.5 | 1.1  | 80 | 320 | 0.979 |
| FDA | 2x4 | 0.6 | 0.9  | 6  | 24  | 0.085 |
| FDA | 2x4 | 0.6 | 0.9  | 10 | 40  | 0.232 |
| FDA | 2x4 | 0.6 | 0.9  | 14 | 56  | 0.438 |
| FDA | 2x4 | 0.6 | 0.9  | 18 | 72  | 0.597 |
| FDA | 2x4 | 0.6 | 0.9  | 22 | 88  | 0.709 |
| FDA | 2x4 | 0.6 | 0.9  | 26 | 104 | 0.757 |
| FDA | 2x4 | 0.6 | 0.9  | 32 | 128 | 0.858 |
| FDA | 2x4 | 0.6 | 0.9  | 36 | 144 | 0.886 |
| FDA | 2x4 | 0.6 | 0.9  | 40 | 160 | 0.894 |
| FDA | 2x4 | 0.6 | 0.9  | 46 | 184 | 0.922 |
| FDA | 2x4 | 0.6 | 0.9  | 50 | 200 | 0.925 |
| FDA | 2x4 | 0.6 | 0.9  | 54 | 216 | 0.952 |
| FDA | 2x4 | 0.6 | 0.9  | 60 | 240 | 0.943 |
| FDA | 2x4 | 0.6 | 0.9  | 66 | 264 | 0.945 |
| FDA | 2x4 | 0.6 | 0.9  | 72 | 288 | 0.967 |
| FDA | 2x4 | 0.6 | 0.9  | 80 | 320 | 0.978 |
| FDA | 2x4 | 0.6 | 0.95 | 6  | 24  | 0.081 |
| FDA | 2x4 | 0.6 | 0.95 | 10 | 40  | 0.264 |
| FDA | 2x4 | 0.6 | 0.95 | 14 | 56  | 0.497 |
| FDA | 2x4 | 0.6 | 0.95 | 18 | 72  | 0.647 |
| FDA | 2x4 | 0.6 | 0.95 | 22 | 88  | 0.772 |
| FDA | 2x4 | 0.6 | 0.95 | 26 | 104 | 0.857 |
| FDA | 2x4 | 0.6 | 0.95 | 30 | 120 | 0.903 |
| FDA | 2x4 | 0.6 | 0.95 | 32 | 128 | 0.916 |

|     |     |     |      |    |     |       |
|-----|-----|-----|------|----|-----|-------|
| FDA | 2x4 | 0.6 | 0.95 | 36 | 144 | 0.939 |
| FDA | 2x4 | 0.6 | 0.95 | 40 | 160 | 0.963 |
| FDA | 2x4 | 0.6 | 0.95 | 46 | 184 | 0.973 |
| FDA | 2x4 | 0.6 | 0.95 | 50 | 200 | 0.989 |
| FDA | 2x4 | 0.6 | 0.95 | 54 | 216 | 0.985 |
| FDA | 2x4 | 0.6 | 0.95 | 60 | 240 | 0.99  |
| FDA | 2x4 | 0.6 | 0.95 | 66 | 264 | 0.993 |
| FDA | 2x4 | 0.6 | 0.95 | 72 | 288 | 0.991 |
| FDA | 2x4 | 0.6 | 0.95 | 80 | 320 | 0.995 |
| FDA | 2x4 | 0.6 | 1    | 6  | 24  | 0.11  |
| FDA | 2x4 | 0.6 | 1    | 10 | 40  | 0.277 |
| FDA | 2x4 | 0.6 | 1    | 14 | 56  | 0.492 |
| FDA | 2x4 | 0.6 | 1    | 18 | 72  | 0.668 |
| FDA | 2x4 | 0.6 | 1    | 22 | 88  | 0.805 |
| FDA | 2x4 | 0.6 | 1    | 24 | 96  | 0.822 |
| FDA | 2x4 | 0.6 | 1    | 26 | 104 | 0.879 |
| FDA | 2x4 | 0.6 | 1    | 30 | 120 | 0.917 |
| FDA | 2x4 | 0.6 | 1    | 36 | 144 | 0.965 |
| FDA | 2x4 | 0.6 | 1    | 40 | 160 | 0.969 |
| FDA | 2x4 | 0.6 | 1    | 46 | 184 | 0.982 |
| FDA | 2x4 | 0.6 | 1    | 50 | 200 | 0.993 |
| FDA | 2x4 | 0.6 | 1    | 54 | 216 | 0.993 |
| FDA | 2x4 | 0.6 | 1    | 60 | 240 | 0.994 |
| FDA | 2x4 | 0.6 | 1    | 66 | 264 | 0.998 |
| FDA | 2x4 | 0.6 | 1    | 72 | 288 | 1     |
| FDA | 2x4 | 0.6 | 1    | 80 | 320 | 0.999 |
| FDA | 2x4 | 0.6 | 1.05 | 6  | 24  | 0.078 |
| FDA | 2x4 | 0.6 | 1.05 | 10 | 40  | 0.252 |
| FDA | 2x4 | 0.6 | 1.05 | 14 | 56  | 0.473 |
| FDA | 2x4 | 0.6 | 1.05 | 18 | 72  | 0.648 |
| FDA | 2x4 | 0.6 | 1.05 | 22 | 88  | 0.761 |
| FDA | 2x4 | 0.6 | 1.05 | 24 | 96  | 0.786 |
| FDA | 2x4 | 0.6 | 1.05 | 26 | 104 | 0.836 |
| FDA | 2x4 | 0.6 | 1.05 | 32 | 128 | 0.917 |
| FDA | 2x4 | 0.6 | 1.05 | 36 | 144 | 0.933 |
| FDA | 2x4 | 0.6 | 1.05 | 40 | 160 | 0.955 |
| FDA | 2x4 | 0.6 | 1.05 | 46 | 184 | 0.955 |
| FDA | 2x4 | 0.6 | 1.05 | 50 | 200 | 0.968 |
| FDA | 2x4 | 0.6 | 1.05 | 54 | 216 | 0.975 |
| FDA | 2x4 | 0.6 | 1.05 | 60 | 240 | 0.98  |
| FDA | 2x4 | 0.6 | 1.05 | 66 | 264 | 0.984 |

|     |     |     |      |    |     |       |
|-----|-----|-----|------|----|-----|-------|
| FDA | 2x4 | 0.6 | 1.05 | 72 | 288 | 0.99  |
| FDA | 2x4 | 0.6 | 1.05 | 80 | 320 | 0.995 |
| FDA | 2x4 | 0.6 | 1.1  | 6  | 24  | 0.068 |
| FDA | 2x4 | 0.6 | 1.1  | 12 | 48  | 0.355 |
| FDA | 2x4 | 0.6 | 1.1  | 18 | 72  | 0.613 |
| FDA | 2x4 | 0.6 | 1.1  | 24 | 96  | 0.719 |
| FDA | 2x4 | 0.6 | 1.1  | 30 | 120 | 0.815 |
| FDA | 2x4 | 0.6 | 1.1  | 32 | 128 | 0.832 |
| FDA | 2x4 | 0.6 | 1.1  | 36 | 144 | 0.877 |
| FDA | 2x4 | 0.6 | 1.1  | 42 | 168 | 0.888 |
| FDA | 2x4 | 0.6 | 1.1  | 46 | 184 | 0.916 |
| FDA | 2x4 | 0.6 | 1.1  | 50 | 200 | 0.936 |
| FDA | 2x4 | 0.6 | 1.1  | 54 | 216 | 0.934 |
| FDA | 2x4 | 0.6 | 1.1  | 60 | 240 | 0.939 |
| FDA | 2x4 | 0.6 | 1.1  | 66 | 264 | 0.951 |
| FDA | 2x4 | 0.6 | 1.1  | 72 | 288 | 0.954 |
| FDA | 2x4 | 0.6 | 1.1  | 80 | 320 | 0.983 |
