# Supplementary material for: Model-Based Approach for Designing an Efficient Bioequivalence Study for Highly Variable Drugs
Source: MDPI journal article supplement (doi:10.3390/ph14111101), 2021-10-28
Supplement: s1 [file s1]

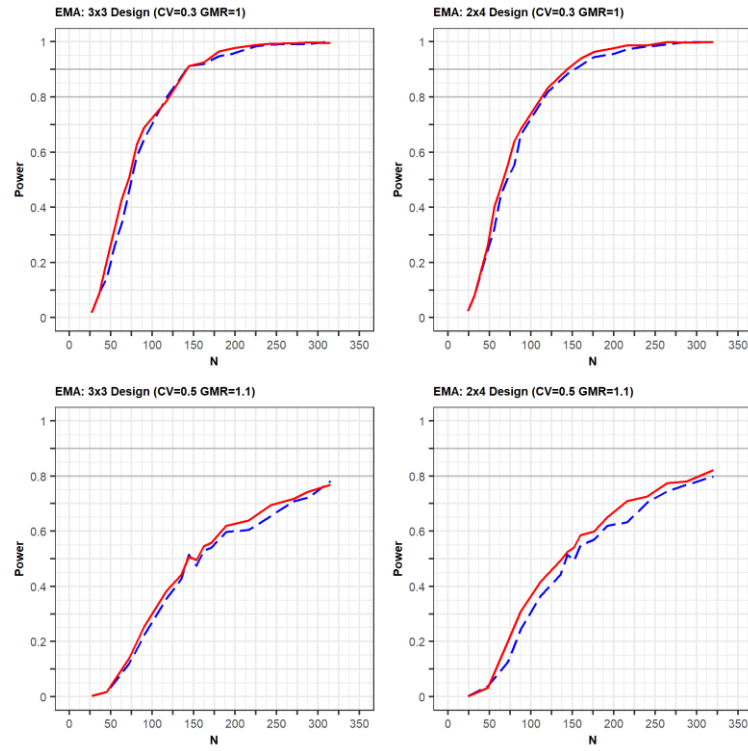

**Figure S1.** Comparison of power between simulations with dropout (blue long-dashed line) and without dropouts (red solid line): The power curves as per the EMA guideline are represented.

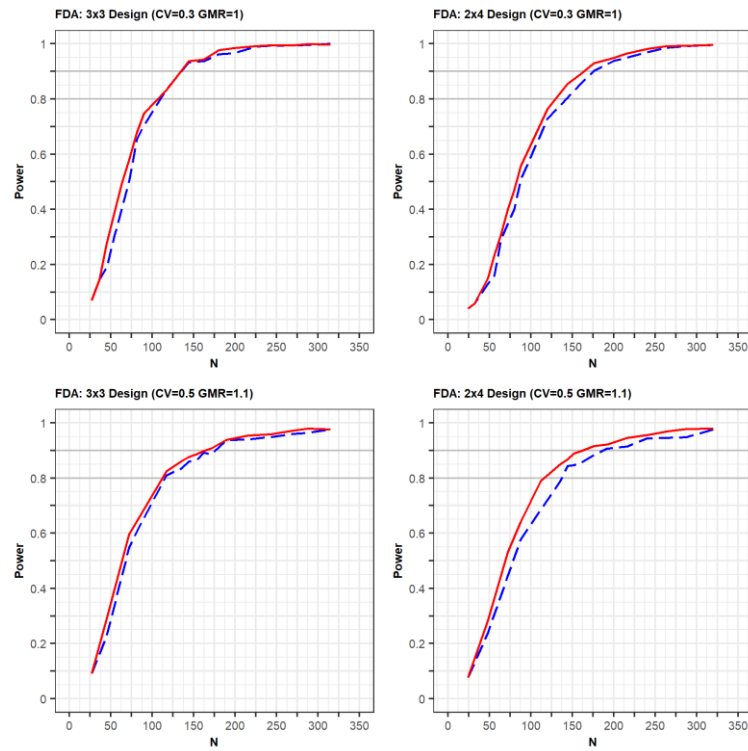

**Figure S2.** Comparison of power between simulations with dropout (blue long-dashed line) and without dropouts (red solid line): The power curves as per the FDA guideline are represented.

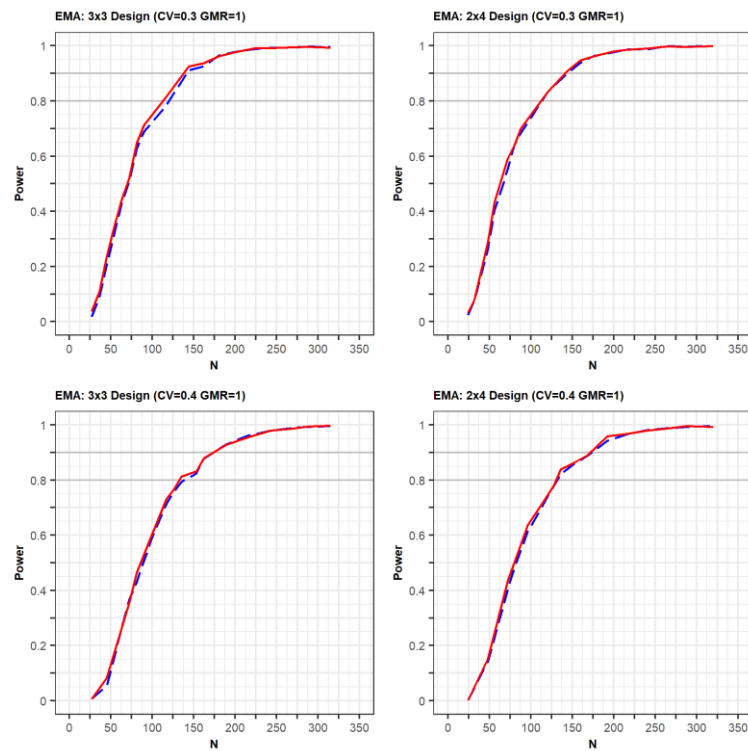

**Figure S3.** Comparison of power between simulations with errors (blue long-dashed line) and without errors (red solid line): The power curves as per the EMA guideline are represented.

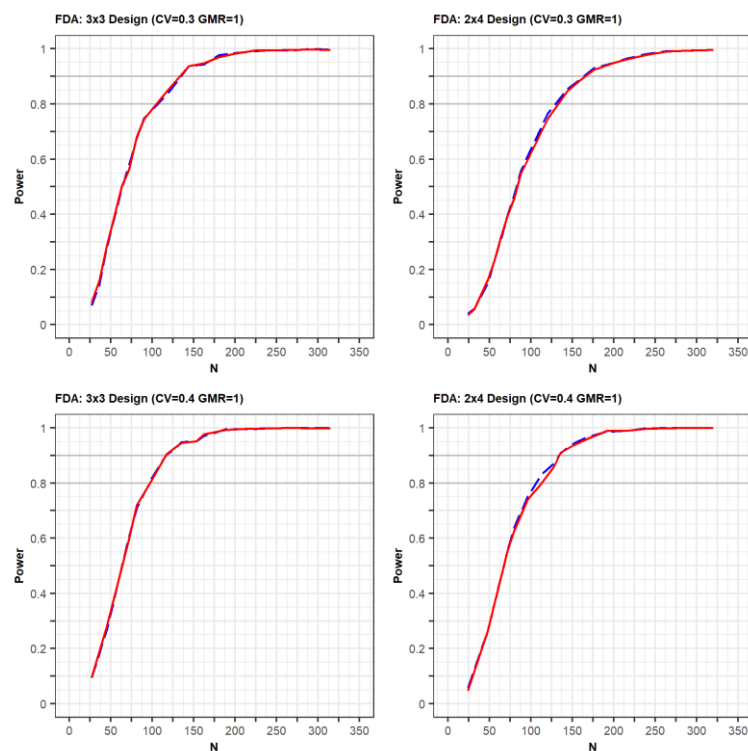

**Figure S4.** Comparison of power between simulations with errors (blue long-dashed line) and without errors (red solid line): The power curves as per the FDA guideline are represented.

**Table S6.** Comparison of power between simulations with and without dropouts: The simulation results are summarized in Figure S1 and Figure S2.

| Agency | Dropout | Design | CV  | GMR | Total number of subject | Total number of hospitalization (N) | Power |
|--------|---------|--------|-----|-----|-------------------------|-------------------------------------|-------|
| EMA    | No      | 2x2    | 0.3 | 1   | 12                      | 24                                  | 0.018 |
| EMA    | No      | 2x2    | 0.3 | 1   | 16                      | 32                                  | 0.044 |
| EMA    | No      | 2x2    | 0.3 | 1   | 24                      | 48                                  | 0.228 |
| EMA    | No      | 2x2    | 0.3 | 1   | 28                      | 56                                  | 0.338 |
| EMA    | No      | 2x2    | 0.3 | 1   | 32                      | 64                                  | 0.445 |
| EMA    | No      | 2x2    | 0.3 | 1   | 36                      | 72                                  | 0.53  |
| EMA    | No      | 2x2    | 0.3 | 1   | 40                      | 80                                  | 0.61  |
| EMA    | No      | 2x2    | 0.3 | 1   | 44                      | 88                                  | 0.662 |
| EMA    | No      | 2x2    | 0.3 | 1   | 60                      | 120                                 | 0.834 |
| EMA    | No      | 2x2    | 0.3 | 1   | 72                      | 144                                 | 0.921 |
| EMA    | No      | 2x2    | 0.3 | 1   | 80                      | 160                                 | 0.948 |
| EMA    | No      | 2x2    | 0.3 | 1   | 88                      | 176                                 | 0.978 |
| EMA    | No      | 2x2    | 0.3 | 1   | 100                     | 200                                 | 0.987 |
| EMA    | No      | 2x2    | 0.3 | 1   | 108                     | 216                                 | 0.992 |
| EMA    | No      | 2x2    | 0.3 | 1   | 120                     | 240                                 | 0.995 |
| EMA    | No      | 2x2    | 0.3 | 1   | 132                     | 264                                 | 0.999 |
| EMA    | No      | 2x2    | 0.3 | 1   | 144                     | 288                                 | 0.999 |
| EMA    | No      | 2x2    | 0.3 | 1   | 160                     | 320                                 | 0.999 |
| EMA    | No      | 2x2    | 0.5 | 1.1 | 12                      | 24                                  | 0.002 |
| EMA    | No      | 2x2    | 0.5 | 1.1 | 24                      | 48                                  | 0.008 |
| EMA    | No      | 2x2    | 0.5 | 1.1 | 36                      | 72                                  | 0.11  |
| EMA    | No      | 2x2    | 0.5 | 1.1 | 44                      | 88                                  | 0.202 |
| EMA    | No      | 2x2    | 0.5 | 1.1 | 56                      | 112                                 | 0.298 |
| EMA    | No      | 2x2    | 0.5 | 1.1 | 68                      | 136                                 | 0.376 |
| EMA    | No      | 2x2    | 0.5 | 1.1 | 72                      | 144                                 | 0.414 |
| EMA    | No      | 2x2    | 0.5 | 1.1 | 76                      | 152                                 | 0.437 |
| EMA    | No      | 2x2    | 0.5 | 1.1 | 80                      | 160                                 | 0.45  |
| EMA    | No      | 2x2    | 0.5 | 1.1 | 88                      | 176                                 | 0.505 |
| EMA    | No      | 2x2    | 0.5 | 1.1 | 96                      | 192                                 | 0.525 |
| EMA    | No      | 2x2    | 0.5 | 1.1 | 108                     | 216                                 | 0.57  |
| EMA    | No      | 2x2    | 0.5 | 1.1 | 120                     | 240                                 | 0.598 |
| EMA    | No      | 2x2    | 0.5 | 1.1 | 132                     | 264                                 | 0.653 |
| EMA    | No      | 2x2    | 0.5 | 1.1 | 144                     | 288                                 | 0.718 |
| EMA    | No      | 2x2    | 0.5 | 1.1 | 160                     | 320                                 | 0.739 |
| EMA    | No      | 3x3    | 0.3 | 1   | 9                       | 27                                  | 0.018 |
| EMA    | No      | 3x3    | 0.3 | 1   | 12                      | 36                                  | 0.089 |
| EMA    | No      | 3x3    | 0.3 | 1   | 15                      | 45                                  | 0.206 |

|     |    |     |     |     |     |     |       |
|-----|----|-----|-----|-----|-----|-----|-------|
| EMA | No | 3x3 | 0.3 | 1   | 18  | 54  | 0.321 |
| EMA | No | 3x3 | 0.3 | 1   | 21  | 63  | 0.43  |
| EMA | No | 3x3 | 0.3 | 1   | 24  | 72  | 0.507 |
| EMA | No | 3x3 | 0.3 | 1   | 27  | 81  | 0.628 |
| EMA | No | 3x3 | 0.3 | 1   | 30  | 90  | 0.689 |
| EMA | No | 3x3 | 0.3 | 1   | 39  | 117 | 0.785 |
| EMA | No | 3x3 | 0.3 | 1   | 48  | 144 | 0.912 |
| EMA | No | 3x3 | 0.3 | 1   | 54  | 162 | 0.926 |
| EMA | No | 3x3 | 0.3 | 1   | 60  | 180 | 0.966 |
| EMA | No | 3x3 | 0.3 | 1   | 66  | 198 | 0.977 |
| EMA | No | 3x3 | 0.3 | 1   | 75  | 225 | 0.989 |
| EMA | No | 3x3 | 0.3 | 1   | 81  | 243 | 0.994 |
| EMA | No | 3x3 | 0.3 | 1   | 90  | 270 | 0.995 |
| EMA | No | 3x3 | 0.3 | 1   | 96  | 288 | 0.998 |
| EMA | No | 3x3 | 0.3 | 1   | 105 | 315 | 0.997 |
| EMA | No | 3x3 | 0.5 | 1.1 | 9   | 27  | 0.003 |
| EMA | No | 3x3 | 0.5 | 1.1 | 15  | 45  | 0.017 |
| EMA | No | 3x3 | 0.5 | 1.1 | 24  | 72  | 0.139 |
| EMA | No | 3x3 | 0.5 | 1.1 | 30  | 90  | 0.253 |
| EMA | No | 3x3 | 0.5 | 1.1 | 39  | 117 | 0.384 |
| EMA | No | 3x3 | 0.5 | 1.1 | 45  | 135 | 0.443 |
| EMA | No | 3x3 | 0.5 | 1.1 | 48  | 144 | 0.508 |
| EMA | No | 3x3 | 0.5 | 1.1 | 51  | 153 | 0.495 |
| EMA | No | 3x3 | 0.5 | 1.1 | 54  | 162 | 0.545 |
| EMA | No | 3x3 | 0.5 | 1.1 | 57  | 171 | 0.558 |
| EMA | No | 3x3 | 0.5 | 1.1 | 63  | 189 | 0.619 |
| EMA | No | 3x3 | 0.5 | 1.1 | 72  | 216 | 0.639 |
| EMA | No | 3x3 | 0.5 | 1.1 | 81  | 243 | 0.694 |
| EMA | No | 3x3 | 0.5 | 1.1 | 90  | 270 | 0.717 |
| EMA | No | 3x3 | 0.5 | 1.1 | 96  | 288 | 0.744 |
| EMA | No | 3x3 | 0.5 | 1.1 | 105 | 315 | 0.768 |
| EMA | No | 2x4 | 0.3 | 1   | 6   | 24  | 0.024 |
| EMA | No | 2x4 | 0.3 | 1   | 8   | 32  | 0.081 |
| EMA | No | 2x4 | 0.3 | 1   | 12  | 48  | 0.263 |
| EMA | No | 2x4 | 0.3 | 1   | 14  | 56  | 0.402 |
| EMA | No | 2x4 | 0.3 | 1   | 16  | 64  | 0.473 |
| EMA | No | 2x4 | 0.3 | 1   | 18  | 72  | 0.554 |
| EMA | No | 2x4 | 0.3 | 1   | 20  | 80  | 0.64  |
| EMA | No | 2x4 | 0.3 | 1   | 22  | 88  | 0.684 |
| EMA | No | 2x4 | 0.3 | 1   | 30  | 120 | 0.833 |
| EMA | No | 2x4 | 0.3 | 1   | 36  | 144 | 0.902 |

|     |     |     |     |     |     |     |       |
|-----|-----|-----|-----|-----|-----|-----|-------|
| EMA | No  | 2x4 | 0.3 | 1   | 40  | 160 | 0.939 |
| EMA | No  | 2x4 | 0.3 | 1   | 44  | 176 | 0.964 |
| EMA | No  | 2x4 | 0.3 | 1   | 50  | 200 | 0.977 |
| EMA | No  | 2x4 | 0.3 | 1   | 54  | 216 | 0.988 |
| EMA | No  | 2x4 | 0.3 | 1   | 60  | 240 | 0.987 |
| EMA | No  | 2x4 | 0.3 | 1   | 66  | 264 | 0.999 |
| EMA | No  | 2x4 | 0.3 | 1   | 72  | 288 | 0.998 |
| EMA | No  | 2x4 | 0.3 | 1   | 80  | 320 | 0.999 |
| EMA | No  | 2x4 | 0.5 | 1.1 | 6   | 24  | 0.001 |
| EMA | No  | 2x4 | 0.5 | 1.1 | 12  | 48  | 0.033 |
| EMA | No  | 2x4 | 0.5 | 1.1 | 18  | 72  | 0.199 |
| EMA | No  | 2x4 | 0.5 | 1.1 | 22  | 88  | 0.309 |
| EMA | No  | 2x4 | 0.5 | 1.1 | 28  | 112 | 0.418 |
| EMA | No  | 2x4 | 0.5 | 1.1 | 34  | 136 | 0.494 |
| EMA | No  | 2x4 | 0.5 | 1.1 | 36  | 144 | 0.525 |
| EMA | No  | 2x4 | 0.5 | 1.1 | 38  | 152 | 0.541 |
| EMA | No  | 2x4 | 0.5 | 1.1 | 40  | 160 | 0.585 |
| EMA | No  | 2x4 | 0.5 | 1.1 | 44  | 176 | 0.599 |
| EMA | No  | 2x4 | 0.5 | 1.1 | 48  | 192 | 0.65  |
| EMA | No  | 2x4 | 0.5 | 1.1 | 54  | 216 | 0.71  |
| EMA | No  | 2x4 | 0.5 | 1.1 | 60  | 240 | 0.726 |
| EMA | No  | 2x4 | 0.5 | 1.1 | 66  | 264 | 0.774 |
| EMA | No  | 2x4 | 0.5 | 1.1 | 72  | 288 | 0.78  |
| EMA | No  | 2x4 | 0.5 | 1.1 | 80  | 320 | 0.822 |
| EMA | Yes | 2x2 | 0.3 | 1   | 12  | 24  | 0.018 |
| EMA | Yes | 2x2 | 0.3 | 1   | 16  | 32  | 0.044 |
| EMA | Yes | 2x2 | 0.3 | 1   | 24  | 48  | 0.162 |
| EMA | Yes | 2x2 | 0.3 | 1   | 28  | 56  | 0.272 |
| EMA | Yes | 2x2 | 0.3 | 1   | 32  | 64  | 0.44  |
| EMA | Yes | 2x2 | 0.3 | 1   | 36  | 72  | 0.467 |
| EMA | Yes | 2x2 | 0.3 | 1   | 40  | 80  | 0.565 |
| EMA | Yes | 2x2 | 0.3 | 1   | 44  | 88  | 0.65  |
| EMA | Yes | 2x2 | 0.3 | 1   | 60  | 120 | 0.844 |
| EMA | Yes | 2x2 | 0.3 | 1   | 72  | 144 | 0.902 |
| EMA | Yes | 2x2 | 0.3 | 1   | 80  | 160 | 0.947 |
| EMA | Yes | 2x2 | 0.3 | 1   | 88  | 176 | 0.967 |
| EMA | Yes | 2x2 | 0.3 | 1   | 100 | 200 | 0.978 |
| EMA | Yes | 2x2 | 0.3 | 1   | 108 | 216 | 0.978 |
| EMA | Yes | 2x2 | 0.3 | 1   | 120 | 240 | 0.996 |
| EMA | Yes | 2x2 | 0.3 | 1   | 132 | 264 | 0.998 |
| EMA | Yes | 2x2 | 0.3 | 1   | 144 | 288 | 0.999 |

|     |     |     |     |     |     |     |       |
|-----|-----|-----|-----|-----|-----|-----|-------|
| EMA | Yes | 2x2 | 0.3 | 1   | 160 | 320 | 0.996 |
| EMA | Yes | 2x2 | 0.5 | 1.1 | 12  | 24  | 0.002 |
| EMA | Yes | 2x2 | 0.5 | 1.1 | 24  | 48  | 0.014 |
| EMA | Yes | 2x2 | 0.5 | 1.1 | 36  | 72  | 0.076 |
| EMA | Yes | 2x2 | 0.5 | 1.1 | 44  | 88  | 0.18  |
| EMA | Yes | 2x2 | 0.5 | 1.1 | 56  | 112 | 0.279 |
| EMA | Yes | 2x2 | 0.5 | 1.1 | 68  | 136 | 0.347 |
| EMA | Yes | 2x2 | 0.5 | 1.1 | 72  | 144 | 0.407 |
| EMA | Yes | 2x2 | 0.5 | 1.1 | 76  | 152 | 0.414 |
| EMA | Yes | 2x2 | 0.5 | 1.1 | 80  | 160 | 0.44  |
| EMA | Yes | 2x2 | 0.5 | 1.1 | 88  | 176 | 0.463 |
| EMA | Yes | 2x2 | 0.5 | 1.1 | 96  | 192 | 0.482 |
| EMA | Yes | 2x2 | 0.5 | 1.1 | 108 | 216 | 0.57  |
| EMA | Yes | 2x2 | 0.5 | 1.1 | 120 | 240 | 0.6   |
| EMA | Yes | 2x2 | 0.5 | 1.1 | 132 | 264 | 0.659 |
| EMA | Yes | 2x2 | 0.5 | 1.1 | 144 | 288 | 0.694 |
| EMA | Yes | 2x2 | 0.5 | 1.1 | 160 | 320 | 0.712 |
| EMA | Yes | 3x3 | 0.3 | 1   | 9   | 27  | 0.018 |
| EMA | Yes | 3x3 | 0.3 | 1   | 12  | 36  | 0.089 |
| EMA | Yes | 3x3 | 0.3 | 1   | 15  | 45  | 0.144 |
| EMA | Yes | 3x3 | 0.3 | 1   | 18  | 54  | 0.257 |
| EMA | Yes | 3x3 | 0.3 | 1   | 21  | 63  | 0.341 |
| EMA | Yes | 3x3 | 0.3 | 1   | 24  | 72  | 0.459 |
| EMA | Yes | 3x3 | 0.3 | 1   | 27  | 81  | 0.584 |
| EMA | Yes | 3x3 | 0.3 | 1   | 30  | 90  | 0.646 |
| EMA | Yes | 3x3 | 0.3 | 1   | 39  | 117 | 0.799 |
| EMA | Yes | 3x3 | 0.3 | 1   | 48  | 144 | 0.912 |
| EMA | Yes | 3x3 | 0.3 | 1   | 54  | 162 | 0.919 |
| EMA | Yes | 3x3 | 0.3 | 1   | 60  | 180 | 0.948 |
| EMA | Yes | 3x3 | 0.3 | 1   | 66  | 198 | 0.958 |
| EMA | Yes | 3x3 | 0.3 | 1   | 75  | 225 | 0.985 |
| EMA | Yes | 3x3 | 0.3 | 1   | 81  | 243 | 0.99  |
| EMA | Yes | 3x3 | 0.3 | 1   | 90  | 270 | 0.992 |
| EMA | Yes | 3x3 | 0.3 | 1   | 96  | 288 | 0.992 |
| EMA | Yes | 3x3 | 0.3 | 1   | 105 | 315 | 1     |
| EMA | Yes | 3x3 | 0.5 | 1.1 | 9   | 27  | 0.003 |
| EMA | Yes | 3x3 | 0.5 | 1.1 | 15  | 45  | 0.016 |
| EMA | Yes | 3x3 | 0.5 | 1.1 | 24  | 72  | 0.12  |
| EMA | Yes | 3x3 | 0.5 | 1.1 | 30  | 90  | 0.222 |
| EMA | Yes | 3x3 | 0.5 | 1.1 | 39  | 117 | 0.356 |
| EMA | Yes | 3x3 | 0.5 | 1.1 | 45  | 135 | 0.428 |

|     |     |     |     |     |     |     |       |
|-----|-----|-----|-----|-----|-----|-----|-------|
| EMA | Yes | 3x3 | 0.5 | 1.1 | 48  | 144 | 0.514 |
| EMA | Yes | 3x3 | 0.5 | 1.1 | 51  | 153 | 0.475 |
| EMA | Yes | 3x3 | 0.5 | 1.1 | 54  | 162 | 0.53  |
| EMA | Yes | 3x3 | 0.5 | 1.1 | 57  | 171 | 0.54  |
| EMA | Yes | 3x3 | 0.5 | 1.1 | 63  | 189 | 0.597 |
| EMA | Yes | 3x3 | 0.5 | 1.1 | 72  | 216 | 0.604 |
| EMA | Yes | 3x3 | 0.5 | 1.1 | 81  | 243 | 0.655 |
| EMA | Yes | 3x3 | 0.5 | 1.1 | 90  | 270 | 0.708 |
| EMA | Yes | 3x3 | 0.5 | 1.1 | 96  | 288 | 0.721 |
| EMA | Yes | 3x3 | 0.5 | 1.1 | 105 | 315 | 0.781 |
| EMA | Yes | 2x4 | 0.3 | 1   | 6   | 24  | 0.024 |
| EMA | Yes | 2x4 | 0.3 | 1   | 8   | 32  | 0.081 |
| EMA | Yes | 2x4 | 0.3 | 1   | 12  | 48  | 0.247 |
| EMA | Yes | 2x4 | 0.3 | 1   | 14  | 56  | 0.324 |
| EMA | Yes | 2x4 | 0.3 | 1   | 16  | 64  | 0.444 |
| EMA | Yes | 2x4 | 0.3 | 1   | 18  | 72  | 0.506 |
| EMA | Yes | 2x4 | 0.3 | 1   | 20  | 80  | 0.552 |
| EMA | Yes | 2x4 | 0.3 | 1   | 22  | 88  | 0.664 |
| EMA | Yes | 2x4 | 0.3 | 1   | 30  | 120 | 0.818 |
| EMA | Yes | 2x4 | 0.3 | 1   | 36  | 144 | 0.884 |
| EMA | Yes | 2x4 | 0.3 | 1   | 40  | 160 | 0.913 |
| EMA | Yes | 2x4 | 0.3 | 1   | 44  | 176 | 0.944 |
| EMA | Yes | 2x4 | 0.3 | 1   | 50  | 200 | 0.956 |
| EMA | Yes | 2x4 | 0.3 | 1   | 54  | 216 | 0.973 |
| EMA | Yes | 2x4 | 0.3 | 1   | 60  | 240 | 0.983 |
| EMA | Yes | 2x4 | 0.3 | 1   | 66  | 264 | 0.99  |
| EMA | Yes | 2x4 | 0.3 | 1   | 72  | 288 | 0.999 |
| EMA | Yes | 2x4 | 0.3 | 1   | 80  | 320 | 0.999 |
| EMA | Yes | 2x4 | 0.5 | 1.1 | 6   | 24  | 0.001 |
| EMA | Yes | 2x4 | 0.5 | 1.1 | 12  | 48  | 0.038 |
| EMA | Yes | 2x4 | 0.5 | 1.1 | 18  | 72  | 0.126 |
| EMA | Yes | 2x4 | 0.5 | 1.1 | 22  | 88  | 0.245 |
| EMA | Yes | 2x4 | 0.5 | 1.1 | 28  | 112 | 0.366 |
| EMA | Yes | 2x4 | 0.5 | 1.1 | 34  | 136 | 0.442 |
| EMA | Yes | 2x4 | 0.5 | 1.1 | 36  | 144 | 0.514 |
| EMA | Yes | 2x4 | 0.5 | 1.1 | 38  | 152 | 0.494 |
| EMA | Yes | 2x4 | 0.5 | 1.1 | 40  | 160 | 0.548 |
| EMA | Yes | 2x4 | 0.5 | 1.1 | 44  | 176 | 0.569 |
| EMA | Yes | 2x4 | 0.5 | 1.1 | 48  | 192 | 0.619 |
| EMA | Yes | 2x4 | 0.5 | 1.1 | 54  | 216 | 0.633 |
| EMA | Yes | 2x4 | 0.5 | 1.1 | 60  | 240 | 0.704 |

|     |     |     |     |     |     |     |       |
|-----|-----|-----|-----|-----|-----|-----|-------|
| EMA | Yes | 2x4 | 0.5 | 1.1 | 66  | 264 | 0.745 |
| EMA | Yes | 2x4 | 0.5 | 1.1 | 72  | 288 | 0.768 |
| EMA | Yes | 2x4 | 0.5 | 1.1 | 80  | 320 | 0.798 |
| FDA | No  | 2x2 | 0.3 | 1   | 12  | 24  | 0.018 |
| FDA | No  | 2x2 | 0.3 | 1   | 16  | 32  | 0.044 |
| FDA | No  | 2x2 | 0.3 | 1   | 24  | 48  | 0.228 |
| FDA | No  | 2x2 | 0.3 | 1   | 28  | 56  | 0.338 |
| FDA | No  | 2x2 | 0.3 | 1   | 32  | 64  | 0.445 |
| FDA | No  | 2x2 | 0.3 | 1   | 36  | 72  | 0.53  |
| FDA | No  | 2x2 | 0.3 | 1   | 40  | 80  | 0.61  |
| FDA | No  | 2x2 | 0.3 | 1   | 44  | 88  | 0.662 |
| FDA | No  | 2x2 | 0.3 | 1   | 60  | 120 | 0.834 |
| FDA | No  | 2x2 | 0.3 | 1   | 72  | 144 | 0.921 |
| FDA | No  | 2x2 | 0.3 | 1   | 80  | 160 | 0.948 |
| FDA | No  | 2x2 | 0.3 | 1   | 88  | 176 | 0.978 |
| FDA | No  | 2x2 | 0.3 | 1   | 100 | 200 | 0.987 |
| FDA | No  | 2x2 | 0.3 | 1   | 108 | 216 | 0.992 |
| FDA | No  | 2x2 | 0.3 | 1   | 120 | 240 | 0.995 |
| FDA | No  | 2x2 | 0.3 | 1   | 132 | 264 | 0.999 |
| FDA | No  | 2x2 | 0.3 | 1   | 144 | 288 | 0.999 |
| FDA | No  | 2x2 | 0.3 | 1   | 160 | 320 | 0.999 |
| FDA | No  | 2x2 | 0.5 | 1.1 | 12  | 24  | 0.002 |
| FDA | No  | 2x2 | 0.5 | 1.1 | 24  | 48  | 0.008 |
| FDA | No  | 2x2 | 0.5 | 1.1 | 36  | 72  | 0.11  |
| FDA | No  | 2x2 | 0.5 | 1.1 | 44  | 88  | 0.202 |
| FDA | No  | 2x2 | 0.5 | 1.1 | 56  | 112 | 0.298 |
| FDA | No  | 2x2 | 0.5 | 1.1 | 68  | 136 | 0.376 |
| FDA | No  | 2x2 | 0.5 | 1.1 | 72  | 144 | 0.414 |
| FDA | No  | 2x2 | 0.5 | 1.1 | 76  | 152 | 0.437 |
| FDA | No  | 2x2 | 0.5 | 1.1 | 80  | 160 | 0.45  |
| FDA | No  | 2x2 | 0.5 | 1.1 | 88  | 176 | 0.505 |
| FDA | No  | 2x2 | 0.5 | 1.1 | 96  | 192 | 0.525 |
| FDA | No  | 2x2 | 0.5 | 1.1 | 108 | 216 | 0.57  |
| FDA | No  | 2x2 | 0.5 | 1.1 | 120 | 240 | 0.598 |
| FDA | No  | 2x2 | 0.5 | 1.1 | 132 | 264 | 0.653 |
| FDA | No  | 2x2 | 0.5 | 1.1 | 144 | 288 | 0.718 |
| FDA | No  | 2x2 | 0.5 | 1.1 | 160 | 320 | 0.739 |
| FDA | No  | 3x3 | 0.3 | 1   | 9   | 27  | 0.07  |
| FDA | No  | 3x3 | 0.3 | 1   | 12  | 36  | 0.145 |
| FDA | No  | 3x3 | 0.3 | 1   | 15  | 45  | 0.276 |
| FDA | No  | 3x3 | 0.3 | 1   | 18  | 54  | 0.389 |



|     |    |     |     |     |     |     |       |
|-----|----|-----|-----|-----|-----|-----|-------|
| FDA | No | 3x3 | 0.3 | 1   | 21  | 63  | 0.494 |
| FDA | No | 3x3 | 0.3 | 1   | 24  | 72  | 0.579 |
| FDA | No | 3x3 | 0.3 | 1   | 27  | 81  | 0.677 |
| FDA | No | 3x3 | 0.3 | 1   | 30  | 90  | 0.749 |
| FDA | No | 3x3 | 0.3 | 1   | 39  | 117 | 0.832 |
| FDA | No | 3x3 | 0.3 | 1   | 48  | 144 | 0.937 |
| FDA | No | 3x3 | 0.3 | 1   | 54  | 162 | 0.943 |
| FDA | No | 3x3 | 0.3 | 1   | 60  | 180 | 0.977 |
| FDA | No | 3x3 | 0.3 | 1   | 66  | 198 | 0.985 |
| FDA | No | 3x3 | 0.3 | 1   | 75  | 225 | 0.992 |
| FDA | No | 3x3 | 0.3 | 1   | 81  | 243 | 0.995 |
| FDA | No | 3x3 | 0.3 | 1   | 90  | 270 | 0.995 |
| FDA | No | 3x3 | 0.3 | 1   | 96  | 288 | 0.999 |
| FDA | No | 3x3 | 0.3 | 1   | 105 | 315 | 0.998 |
| FDA | No | 3x3 | 0.5 | 1.1 | 9   | 27  | 0.091 |
| FDA | No | 3x3 | 0.5 | 1.1 | 15  | 45  | 0.291 |
| FDA | No | 3x3 | 0.5 | 1.1 | 24  | 72  | 0.596 |
| FDA | No | 3x3 | 0.5 | 1.1 | 30  | 90  | 0.687 |
| FDA | No | 3x3 | 0.5 | 1.1 | 39  | 117 | 0.824 |
| FDA | No | 3x3 | 0.5 | 1.1 | 45  | 135 | 0.861 |
| FDA | No | 3x3 | 0.5 | 1.1 | 48  | 144 | 0.876 |
| FDA | No | 3x3 | 0.5 | 1.1 | 51  | 153 | 0.886 |
| FDA | No | 3x3 | 0.5 | 1.1 | 54  | 162 | 0.898 |
| FDA | No | 3x3 | 0.5 | 1.1 | 57  | 171 | 0.907 |
| FDA | No | 3x3 | 0.5 | 1.1 | 63  | 189 | 0.938 |
| FDA | No | 3x3 | 0.5 | 1.1 | 72  | 216 | 0.954 |
| FDA | No | 3x3 | 0.5 | 1.1 | 81  | 243 | 0.958 |
| FDA | No | 3x3 | 0.5 | 1.1 | 90  | 270 | 0.972 |
| FDA | No | 3x3 | 0.5 | 1.1 | 96  | 288 | 0.979 |
| FDA | No | 3x3 | 0.5 | 1.1 | 105 | 315 | 0.976 |
| FDA | No | 2x4 | 0.3 | 1   | 6   | 24  | 0.041 |
| FDA | No | 2x4 | 0.3 | 1   | 8   | 32  | 0.058 |
| FDA | No | 2x4 | 0.3 | 1   | 12  | 48  | 0.15  |
| FDA | No | 2x4 | 0.3 | 1   | 14  | 56  | 0.234 |
| FDA | No | 2x4 | 0.3 | 1   | 16  | 64  | 0.308 |
| FDA | No | 2x4 | 0.3 | 1   | 18  | 72  | 0.399 |
| FDA | No | 2x4 | 0.3 | 1   | 20  | 80  | 0.471 |
| FDA | No | 2x4 | 0.3 | 1   | 22  | 88  | 0.557 |
| FDA | No | 2x4 | 0.3 | 1   | 30  | 120 | 0.764 |
| FDA | No | 2x4 | 0.3 | 1   | 36  | 144 | 0.855 |
| FDA | No | 2x4 | 0.3 | 1   | 40  | 160 | 0.89  |

|     |     |     |     |     |     |     |       |
|-----|-----|-----|-----|-----|-----|-----|-------|
| FDA | No  | 2x4 | 0.3 | 1   | 44  | 176 | 0.93  |
| FDA | No  | 2x4 | 0.3 | 1   | 50  | 200 | 0.949 |
| FDA | No  | 2x4 | 0.3 | 1   | 54  | 216 | 0.965 |
| FDA | No  | 2x4 | 0.3 | 1   | 60  | 240 | 0.982 |
| FDA | No  | 2x4 | 0.3 | 1   | 66  | 264 | 0.992 |
| FDA | No  | 2x4 | 0.3 | 1   | 72  | 288 | 0.993 |
| FDA | No  | 2x4 | 0.3 | 1   | 80  | 320 | 0.996 |
| FDA | No  | 2x4 | 0.5 | 1.1 | 6   | 24  | 0.077 |
| FDA | No  | 2x4 | 0.5 | 1.1 | 12  | 48  | 0.283 |
| FDA | No  | 2x4 | 0.5 | 1.1 | 18  | 72  | 0.531 |
| FDA | No  | 2x4 | 0.5 | 1.1 | 22  | 88  | 0.641 |
| FDA | No  | 2x4 | 0.5 | 1.1 | 28  | 112 | 0.789 |
| FDA | No  | 2x4 | 0.5 | 1.1 | 34  | 136 | 0.851 |
| FDA | No  | 2x4 | 0.5 | 1.1 | 36  | 144 | 0.867 |
| FDA | No  | 2x4 | 0.5 | 1.1 | 38  | 152 | 0.889 |
| FDA | No  | 2x4 | 0.5 | 1.1 | 40  | 160 | 0.896 |
| FDA | No  | 2x4 | 0.5 | 1.1 | 44  | 176 | 0.916 |
| FDA | No  | 2x4 | 0.5 | 1.1 | 48  | 192 | 0.922 |
| FDA | No  | 2x4 | 0.5 | 1.1 | 54  | 216 | 0.946 |
| FDA | No  | 2x4 | 0.5 | 1.1 | 60  | 240 | 0.956 |
| FDA | No  | 2x4 | 0.5 | 1.1 | 66  | 264 | 0.969 |
| FDA | No  | 2x4 | 0.5 | 1.1 | 72  | 288 | 0.978 |
| FDA | No  | 2x4 | 0.5 | 1.1 | 80  | 320 | 0.979 |
| FDA | Yes | 2x2 | 0.3 | 1   | 12  | 24  | 0.018 |
| FDA | Yes | 2x2 | 0.3 | 1   | 16  | 32  | 0.044 |
| FDA | Yes | 2x2 | 0.3 | 1   | 24  | 48  | 0.162 |
| FDA | Yes | 2x2 | 0.3 | 1   | 28  | 56  | 0.272 |
| FDA | Yes | 2x2 | 0.3 | 1   | 32  | 64  | 0.44  |
| FDA | Yes | 2x2 | 0.3 | 1   | 36  | 72  | 0.467 |
| FDA | Yes | 2x2 | 0.3 | 1   | 40  | 80  | 0.565 |
| FDA | Yes | 2x2 | 0.3 | 1   | 44  | 88  | 0.65  |
| FDA | Yes | 2x2 | 0.3 | 1   | 60  | 120 | 0.844 |
| FDA | Yes | 2x2 | 0.3 | 1   | 72  | 144 | 0.902 |
| FDA | Yes | 2x2 | 0.3 | 1   | 80  | 160 | 0.947 |
| FDA | Yes | 2x2 | 0.3 | 1   | 88  | 176 | 0.967 |
| FDA | Yes | 2x2 | 0.3 | 1   | 100 | 200 | 0.978 |
| FDA | Yes | 2x2 | 0.3 | 1   | 108 | 216 | 0.978 |
| FDA | Yes | 2x2 | 0.3 | 1   | 120 | 240 | 0.996 |
| FDA | Yes | 2x2 | 0.3 | 1   | 132 | 264 | 0.998 |
| FDA | Yes | 2x2 | 0.3 | 1   | 144 | 288 | 0.999 |
| FDA | Yes | 2x2 | 0.3 | 1   | 160 | 320 | 0.996 |

|     |     |     |     |     |     |     |       |
|-----|-----|-----|-----|-----|-----|-----|-------|
| FDA | Yes | 2x2 | 0.5 | 1.1 | 12  | 24  | 0.002 |
| FDA | Yes | 2x2 | 0.5 | 1.1 | 24  | 48  | 0.014 |
| FDA | Yes | 2x2 | 0.5 | 1.1 | 36  | 72  | 0.076 |
| FDA | Yes | 2x2 | 0.5 | 1.1 | 44  | 88  | 0.18  |
| FDA | Yes | 2x2 | 0.5 | 1.1 | 56  | 112 | 0.279 |
| FDA | Yes | 2x2 | 0.5 | 1.1 | 68  | 136 | 0.347 |
| FDA | Yes | 2x2 | 0.5 | 1.1 | 72  | 144 | 0.407 |
| FDA | Yes | 2x2 | 0.5 | 1.1 | 76  | 152 | 0.414 |
| FDA | Yes | 2x2 | 0.5 | 1.1 | 80  | 160 | 0.44  |
| FDA | Yes | 2x2 | 0.5 | 1.1 | 88  | 176 | 0.463 |
| FDA | Yes | 2x2 | 0.5 | 1.1 | 96  | 192 | 0.482 |
| FDA | Yes | 2x2 | 0.5 | 1.1 | 108 | 216 | 0.57  |
| FDA | Yes | 2x2 | 0.5 | 1.1 | 120 | 240 | 0.6   |
| FDA | Yes | 2x2 | 0.5 | 1.1 | 132 | 264 | 0.659 |
| FDA | Yes | 2x2 | 0.5 | 1.1 | 144 | 288 | 0.694 |
| FDA | Yes | 2x2 | 0.5 | 1.1 | 160 | 320 | 0.712 |
| FDA | Yes | 3x3 | 0.3 | 1   | 9   | 27  | 0.07  |
| FDA | Yes | 3x3 | 0.3 | 1   | 12  | 36  | 0.145 |
| FDA | Yes | 3x3 | 0.3 | 1   | 15  | 45  | 0.19  |
| FDA | Yes | 3x3 | 0.3 | 1   | 18  | 54  | 0.304 |
| FDA | Yes | 3x3 | 0.3 | 1   | 21  | 63  | 0.403 |
| FDA | Yes | 3x3 | 0.3 | 1   | 24  | 72  | 0.5   |
| FDA | Yes | 3x3 | 0.3 | 1   | 27  | 81  | 0.652 |
| FDA | Yes | 3x3 | 0.3 | 1   | 30  | 90  | 0.705 |
| FDA | Yes | 3x3 | 0.3 | 1   | 39  | 117 | 0.834 |
| FDA | Yes | 3x3 | 0.3 | 1   | 48  | 144 | 0.933 |
| FDA | Yes | 3x3 | 0.3 | 1   | 54  | 162 | 0.938 |
| FDA | Yes | 3x3 | 0.3 | 1   | 60  | 180 | 0.962 |
| FDA | Yes | 3x3 | 0.3 | 1   | 66  | 198 | 0.965 |
| FDA | Yes | 3x3 | 0.3 | 1   | 75  | 225 | 0.99  |
| FDA | Yes | 3x3 | 0.3 | 1   | 81  | 243 | 0.993 |
| FDA | Yes | 3x3 | 0.3 | 1   | 90  | 270 | 0.995 |
| FDA | Yes | 3x3 | 0.3 | 1   | 96  | 288 | 0.996 |
| FDA | Yes | 3x3 | 0.3 | 1   | 105 | 315 | 1     |
| FDA | Yes | 3x3 | 0.5 | 1.1 | 9   | 27  | 0.091 |
| FDA | Yes | 3x3 | 0.5 | 1.1 | 15  | 45  | 0.229 |
| FDA | Yes | 3x3 | 0.5 | 1.1 | 24  | 72  | 0.547 |
| FDA | Yes | 3x3 | 0.5 | 1.1 | 30  | 90  | 0.656 |
| FDA | Yes | 3x3 | 0.5 | 1.1 | 39  | 117 | 0.809 |
| FDA | Yes | 3x3 | 0.5 | 1.1 | 45  | 135 | 0.835 |
| FDA | Yes | 3x3 | 0.5 | 1.1 | 48  | 144 | 0.86  |

|     |     |     |     |     |     |     |       |
|-----|-----|-----|-----|-----|-----|-----|-------|
| FDA | Yes | 3x3 | 0.5 | 1.1 | 51  | 153 | 0.865 |
| FDA | Yes | 3x3 | 0.5 | 1.1 | 54  | 162 | 0.892 |
| FDA | Yes | 3x3 | 0.5 | 1.1 | 57  | 171 | 0.885 |
| FDA | Yes | 3x3 | 0.5 | 1.1 | 63  | 189 | 0.937 |
| FDA | Yes | 3x3 | 0.5 | 1.1 | 72  | 216 | 0.941 |
| FDA | Yes | 3x3 | 0.5 | 1.1 | 81  | 243 | 0.948 |
| FDA | Yes | 3x3 | 0.5 | 1.1 | 90  | 270 | 0.96  |
| FDA | Yes | 3x3 | 0.5 | 1.1 | 96  | 288 | 0.964 |
| FDA | Yes | 3x3 | 0.5 | 1.1 | 105 | 315 | 0.977 |
| FDA | Yes | 2x4 | 0.3 | 1   | 6   | 24  | 0.041 |
| FDA | Yes | 2x4 | 0.3 | 1   | 8   | 32  | 0.058 |
| FDA | Yes | 2x4 | 0.3 | 1   | 12  | 48  | 0.131 |
| FDA | Yes | 2x4 | 0.3 | 1   | 14  | 56  | 0.16  |
| FDA | Yes | 2x4 | 0.3 | 1   | 16  | 64  | 0.288 |
| FDA | Yes | 2x4 | 0.3 | 1   | 18  | 72  | 0.347 |
| FDA | Yes | 2x4 | 0.3 | 1   | 20  | 80  | 0.4   |
| FDA | Yes | 2x4 | 0.3 | 1   | 22  | 88  | 0.508 |
| FDA | Yes | 2x4 | 0.3 | 1   | 30  | 120 | 0.73  |
| FDA | Yes | 2x4 | 0.3 | 1   | 36  | 144 | 0.804 |
| FDA | Yes | 2x4 | 0.3 | 1   | 40  | 160 | 0.855 |
| FDA | Yes | 2x4 | 0.3 | 1   | 44  | 176 | 0.902 |
| FDA | Yes | 2x4 | 0.3 | 1   | 50  | 200 | 0.939 |
| FDA | Yes | 2x4 | 0.3 | 1   | 54  | 216 | 0.951 |
| FDA | Yes | 2x4 | 0.3 | 1   | 60  | 240 | 0.97  |
| FDA | Yes | 2x4 | 0.3 | 1   | 66  | 264 | 0.986 |
| FDA | Yes | 2x4 | 0.3 | 1   | 72  | 288 | 0.992 |
| FDA | Yes | 2x4 | 0.3 | 1   | 80  | 320 | 0.997 |
| FDA | Yes | 2x4 | 0.5 | 1.1 | 6   | 24  | 0.077 |
| FDA | Yes | 2x4 | 0.5 | 1.1 | 12  | 48  | 0.239 |
| FDA | Yes | 2x4 | 0.5 | 1.1 | 18  | 72  | 0.445 |
| FDA | Yes | 2x4 | 0.5 | 1.1 | 22  | 88  | 0.578 |
| FDA | Yes | 2x4 | 0.5 | 1.1 | 28  | 112 | 0.686 |
| FDA | Yes | 2x4 | 0.5 | 1.1 | 34  | 136 | 0.791 |
| FDA | Yes | 2x4 | 0.5 | 1.1 | 36  | 144 | 0.844 |
| FDA | Yes | 2x4 | 0.5 | 1.1 | 38  | 152 | 0.847 |
| FDA | Yes | 2x4 | 0.5 | 1.1 | 40  | 160 | 0.854 |
| FDA | Yes | 2x4 | 0.5 | 1.1 | 44  | 176 | 0.884 |
| FDA | Yes | 2x4 | 0.5 | 1.1 | 48  | 192 | 0.907 |
| FDA | Yes | 2x4 | 0.5 | 1.1 | 54  | 216 | 0.915 |
| FDA | Yes | 2x4 | 0.5 | 1.1 | 60  | 240 | 0.944 |
| FDA | Yes | 2x4 | 0.5 | 1.1 | 66  | 264 | 0.945 |

|     |     |     |     |     |    |     |       |
|-----|-----|-----|-----|-----|----|-----|-------|
| FDA | Yes | 2x4 | 0.5 | 1.1 | 72 | 288 | 0.949 |
| FDA | Yes | 2x4 | 0.5 | 1.1 | 80 | 320 | 0.976 |

**Table S7.** Comparison of power between simulations with and without errors: The simulation results are summarized in Figure S3 and Figure S4.

| Agency | Error | Design | CV  | GMR | Total number of subject | Total number of hospitalization (N) | Power |
|--------|-------|--------|-----|-----|-------------------------|-------------------------------------|-------|
| EMA    | Yes   | 2x2    | 0.3 | 1   | 12                      | 24                                  | 0.018 |
| EMA    | Yes   | 2x2    | 0.3 | 1   | 16                      | 32                                  | 0.044 |
| EMA    | Yes   | 2x2    | 0.3 | 1   | 24                      | 48                                  | 0.228 |
| EMA    | Yes   | 2x2    | 0.3 | 1   | 28                      | 56                                  | 0.338 |
| EMA    | Yes   | 2x2    | 0.3 | 1   | 32                      | 64                                  | 0.445 |
| EMA    | Yes   | 2x2    | 0.3 | 1   | 36                      | 72                                  | 0.53  |
| EMA    | Yes   | 2x2    | 0.3 | 1   | 40                      | 80                                  | 0.61  |
| EMA    | Yes   | 2x2    | 0.3 | 1   | 44                      | 88                                  | 0.662 |
| EMA    | Yes   | 2x2    | 0.3 | 1   | 60                      | 120                                 | 0.834 |
| EMA    | Yes   | 2x2    | 0.3 | 1   | 72                      | 144                                 | 0.921 |
| EMA    | Yes   | 2x2    | 0.3 | 1   | 80                      | 160                                 | 0.948 |
| EMA    | Yes   | 2x2    | 0.3 | 1   | 88                      | 176                                 | 0.978 |
| EMA    | Yes   | 2x2    | 0.3 | 1   | 100                     | 200                                 | 0.987 |
| EMA    | Yes   | 2x2    | 0.3 | 1   | 108                     | 216                                 | 0.992 |
| EMA    | Yes   | 2x2    | 0.3 | 1   | 120                     | 240                                 | 0.995 |
| EMA    | Yes   | 2x2    | 0.3 | 1   | 132                     | 264                                 | 0.999 |
| EMA    | Yes   | 2x2    | 0.3 | 1   | 144                     | 288                                 | 0.999 |
| EMA    | Yes   | 2x2    | 0.3 | 1   | 160                     | 320                                 | 0.999 |
| EMA    | Yes   | 2x2    | 0.4 | 1   | 12                      | 24                                  | 0.007 |
| EMA    | Yes   | 2x2    | 0.4 | 1   | 24                      | 48                                  | 0.07  |
| EMA    | Yes   | 2x2    | 0.4 | 1   | 36                      | 72                                  | 0.29  |
| EMA    | Yes   | 2x2    | 0.4 | 1   | 40                      | 80                                  | 0.385 |
| EMA    | Yes   | 2x2    | 0.4 | 1   | 48                      | 96                                  | 0.521 |
| EMA    | Yes   | 2x2    | 0.4 | 1   | 56                      | 112                                 | 0.65  |
| EMA    | Yes   | 2x2    | 0.4 | 1   | 64                      | 128                                 | 0.737 |
| EMA    | Yes   | 2x2    | 0.4 | 1   | 68                      | 136                                 | 0.787 |
| EMA    | Yes   | 2x2    | 0.4 | 1   | 76                      | 152                                 | 0.809 |
| EMA    | Yes   | 2x2    | 0.4 | 1   | 84                      | 168                                 | 0.866 |
| EMA    | Yes   | 2x2    | 0.4 | 1   | 96                      | 192                                 | 0.924 |
| EMA    | Yes   | 2x2    | 0.4 | 1   | 108                     | 216                                 | 0.944 |
| EMA    | Yes   | 2x2    | 0.4 | 1   | 120                     | 240                                 | 0.971 |
| EMA    | Yes   | 2x2    | 0.4 | 1   | 132                     | 264                                 | 0.978 |
| EMA    | Yes   | 2x2    | 0.4 | 1   | 144                     | 288                                 | 0.985 |
| EMA    | Yes   | 2x2    | 0.4 | 1   | 160                     | 320                                 | 0.994 |
| EMA    | Yes   | 3x3    | 0.3 | 1   | 9                       | 27                                  | 0.018 |
| EMA    | Yes   | 3x3    | 0.3 | 1   | 12                      | 36                                  | 0.089 |
| EMA    | Yes   | 3x3    | 0.3 | 1   | 15                      | 45                                  | 0.206 |

|     |     |     |     |   |     |     |       |
|-----|-----|-----|-----|---|-----|-----|-------|
| EMA | Yes | 3x3 | 0.3 | 1 | 18  | 54  | 0.321 |
| EMA | Yes | 3x3 | 0.3 | 1 | 21  | 63  | 0.43  |
| EMA | Yes | 3x3 | 0.3 | 1 | 24  | 72  | 0.507 |
| EMA | Yes | 3x3 | 0.3 | 1 | 27  | 81  | 0.628 |
| EMA | Yes | 3x3 | 0.3 | 1 | 30  | 90  | 0.689 |
| EMA | Yes | 3x3 | 0.3 | 1 | 39  | 117 | 0.785 |
| EMA | Yes | 3x3 | 0.3 | 1 | 48  | 144 | 0.912 |
| EMA | Yes | 3x3 | 0.3 | 1 | 54  | 162 | 0.926 |
| EMA | Yes | 3x3 | 0.3 | 1 | 60  | 180 | 0.966 |
| EMA | Yes | 3x3 | 0.3 | 1 | 66  | 198 | 0.977 |
| EMA | Yes | 3x3 | 0.3 | 1 | 75  | 225 | 0.989 |
| EMA | Yes | 3x3 | 0.3 | 1 | 81  | 243 | 0.994 |
| EMA | Yes | 3x3 | 0.3 | 1 | 90  | 270 | 0.995 |
| EMA | Yes | 3x3 | 0.3 | 1 | 96  | 288 | 0.998 |
| EMA | Yes | 3x3 | 0.3 | 1 | 105 | 315 | 0.997 |
| EMA | Yes | 3x3 | 0.4 | 1 | 9   | 27  | 0.007 |
| EMA | Yes | 3x3 | 0.4 | 1 | 15  | 45  | 0.055 |
| EMA | Yes | 3x3 | 0.4 | 1 | 24  | 72  | 0.364 |
| EMA | Yes | 3x3 | 0.4 | 1 | 27  | 81  | 0.431 |
| EMA | Yes | 3x3 | 0.4 | 1 | 33  | 99  | 0.586 |
| EMA | Yes | 3x3 | 0.4 | 1 | 39  | 117 | 0.714 |
| EMA | Yes | 3x3 | 0.4 | 1 | 42  | 126 | 0.756 |
| EMA | Yes | 3x3 | 0.4 | 1 | 45  | 135 | 0.793 |
| EMA | Yes | 3x3 | 0.4 | 1 | 51  | 153 | 0.825 |
| EMA | Yes | 3x3 | 0.4 | 1 | 54  | 162 | 0.877 |
| EMA | Yes | 3x3 | 0.4 | 1 | 63  | 189 | 0.929 |
| EMA | Yes | 3x3 | 0.4 | 1 | 72  | 216 | 0.961 |
| EMA | Yes | 3x3 | 0.4 | 1 | 81  | 243 | 0.979 |
| EMA | Yes | 3x3 | 0.4 | 1 | 90  | 270 | 0.989 |
| EMA | Yes | 3x3 | 0.4 | 1 | 96  | 288 | 0.992 |
| EMA | Yes | 3x3 | 0.4 | 1 | 105 | 315 | 0.996 |
| EMA | Yes | 2x4 | 0.3 | 1 | 6   | 24  | 0.024 |
| EMA | Yes | 2x4 | 0.3 | 1 | 8   | 32  | 0.081 |
| EMA | Yes | 2x4 | 0.3 | 1 | 12  | 48  | 0.263 |
| EMA | Yes | 2x4 | 0.3 | 1 | 14  | 56  | 0.402 |
| EMA | Yes | 2x4 | 0.3 | 1 | 16  | 64  | 0.473 |
| EMA | Yes | 2x4 | 0.3 | 1 | 18  | 72  | 0.554 |
| EMA | Yes | 2x4 | 0.3 | 1 | 20  | 80  | 0.64  |
| EMA | Yes | 2x4 | 0.3 | 1 | 22  | 88  | 0.684 |
| EMA | Yes | 2x4 | 0.3 | 1 | 30  | 120 | 0.833 |
| EMA | Yes | 2x4 | 0.3 | 1 | 36  | 144 | 0.902 |

|     |     |     |     |   |     |     |       |
|-----|-----|-----|-----|---|-----|-----|-------|
| EMA | Yes | 2x4 | 0.3 | 1 | 40  | 160 | 0.939 |
| EMA | Yes | 2x4 | 0.3 | 1 | 44  | 176 | 0.964 |
| EMA | Yes | 2x4 | 0.3 | 1 | 50  | 200 | 0.977 |
| EMA | Yes | 2x4 | 0.3 | 1 | 54  | 216 | 0.988 |
| EMA | Yes | 2x4 | 0.3 | 1 | 60  | 240 | 0.987 |
| EMA | Yes | 2x4 | 0.3 | 1 | 66  | 264 | 0.999 |
| EMA | Yes | 2x4 | 0.3 | 1 | 72  | 288 | 0.998 |
| EMA | Yes | 2x4 | 0.3 | 1 | 80  | 320 | 0.999 |
| EMA | Yes | 2x4 | 0.4 | 1 | 6   | 24  | 0.002 |
| EMA | Yes | 2x4 | 0.4 | 1 | 12  | 48  | 0.141 |
| EMA | Yes | 2x4 | 0.4 | 1 | 18  | 72  | 0.403 |
| EMA | Yes | 2x4 | 0.4 | 1 | 20  | 80  | 0.483 |
| EMA | Yes | 2x4 | 0.4 | 1 | 24  | 96  | 0.613 |
| EMA | Yes | 2x4 | 0.4 | 1 | 28  | 112 | 0.694 |
| EMA | Yes | 2x4 | 0.4 | 1 | 32  | 128 | 0.78  |
| EMA | Yes | 2x4 | 0.4 | 1 | 34  | 136 | 0.82  |
| EMA | Yes | 2x4 | 0.4 | 1 | 38  | 152 | 0.858 |
| EMA | Yes | 2x4 | 0.4 | 1 | 42  | 168 | 0.888 |
| EMA | Yes | 2x4 | 0.4 | 1 | 48  | 192 | 0.943 |
| EMA | Yes | 2x4 | 0.4 | 1 | 54  | 216 | 0.966 |
| EMA | Yes | 2x4 | 0.4 | 1 | 60  | 240 | 0.981 |
| EMA | Yes | 2x4 | 0.4 | 1 | 66  | 264 | 0.988 |
| EMA | Yes | 2x4 | 0.4 | 1 | 72  | 288 | 0.993 |
| EMA | Yes | 2x4 | 0.4 | 1 | 80  | 320 | 0.996 |
| EMA | No  | 2x2 | 0.3 | 1 | 12  | 24  | 0.028 |
| EMA | No  | 2x2 | 0.3 | 1 | 16  | 32  | 0.067 |
| EMA | No  | 2x2 | 0.3 | 1 | 24  | 48  | 0.259 |
| EMA | No  | 2x2 | 0.3 | 1 | 28  | 56  | 0.383 |
| EMA | No  | 2x2 | 0.3 | 1 | 32  | 64  | 0.498 |
| EMA | No  | 2x2 | 0.3 | 1 | 36  | 72  | 0.58  |
| EMA | No  | 2x2 | 0.3 | 1 | 40  | 80  | 0.641 |
| EMA | No  | 2x2 | 0.3 | 1 | 44  | 88  | 0.693 |
| EMA | No  | 2x2 | 0.3 | 1 | 60  | 120 | 0.876 |
| EMA | No  | 2x2 | 0.3 | 1 | 72  | 144 | 0.935 |
| EMA | No  | 2x2 | 0.3 | 1 | 80  | 160 | 0.955 |
| EMA | No  | 2x2 | 0.3 | 1 | 88  | 176 | 0.982 |
| EMA | No  | 2x2 | 0.3 | 1 | 100 | 200 | 0.986 |
| EMA | No  | 2x2 | 0.3 | 1 | 108 | 216 | 0.994 |
| EMA | No  | 2x2 | 0.3 | 1 | 120 | 240 | 0.997 |
| EMA | No  | 2x2 | 0.3 | 1 | 132 | 264 | 0.999 |
| EMA | No  | 2x2 | 0.3 | 1 | 144 | 288 | 0.999 |



|     |    |     |     |   |     |     |       |
|-----|----|-----|-----|---|-----|-----|-------|
| EMA | No | 2x2 | 0.3 | 1 | 160 | 320 | 1     |
| EMA | No | 2x2 | 0.4 | 1 | 12  | 24  | 0.01  |
| EMA | No | 2x2 | 0.4 | 1 | 24  | 48  | 0.087 |
| EMA | No | 2x2 | 0.4 | 1 | 36  | 72  | 0.317 |
| EMA | No | 2x2 | 0.4 | 1 | 40  | 80  | 0.396 |
| EMA | No | 2x2 | 0.4 | 1 | 48  | 96  | 0.558 |
| EMA | No | 2x2 | 0.4 | 1 | 56  | 112 | 0.666 |
| EMA | No | 2x2 | 0.4 | 1 | 64  | 128 | 0.751 |
| EMA | No | 2x2 | 0.4 | 1 | 68  | 136 | 0.804 |
| EMA | No | 2x2 | 0.4 | 1 | 76  | 152 | 0.828 |
| EMA | No | 2x2 | 0.4 | 1 | 84  | 168 | 0.893 |
| EMA | No | 2x2 | 0.4 | 1 | 96  | 192 | 0.938 |
| EMA | No | 2x2 | 0.4 | 1 | 108 | 216 | 0.95  |
| EMA | No | 2x2 | 0.4 | 1 | 120 | 240 | 0.975 |
| EMA | No | 2x2 | 0.4 | 1 | 132 | 264 | 0.984 |
| EMA | No | 2x2 | 0.4 | 1 | 144 | 288 | 0.987 |
| EMA | No | 2x2 | 0.4 | 1 | 160 | 320 | 0.995 |
| EMA | No | 3x3 | 0.3 | 1 | 9   | 27  | 0.037 |
| EMA | No | 3x3 | 0.3 | 1 | 12  | 36  | 0.109 |
| EMA | No | 3x3 | 0.3 | 1 | 15  | 45  | 0.235 |
| EMA | No | 3x3 | 0.3 | 1 | 18  | 54  | 0.348 |
| EMA | No | 3x3 | 0.3 | 1 | 21  | 63  | 0.443 |
| EMA | No | 3x3 | 0.3 | 1 | 24  | 72  | 0.518 |
| EMA | No | 3x3 | 0.3 | 1 | 27  | 81  | 0.648 |
| EMA | No | 3x3 | 0.3 | 1 | 30  | 90  | 0.713 |
| EMA | No | 3x3 | 0.3 | 1 | 39  | 117 | 0.817 |
| EMA | No | 3x3 | 0.3 | 1 | 48  | 144 | 0.926 |
| EMA | No | 3x3 | 0.3 | 1 | 54  | 162 | 0.938 |
| EMA | No | 3x3 | 0.3 | 1 | 60  | 180 | 0.962 |
| EMA | No | 3x3 | 0.3 | 1 | 66  | 198 | 0.975 |
| EMA | No | 3x3 | 0.3 | 1 | 75  | 225 | 0.992 |
| EMA | No | 3x3 | 0.3 | 1 | 81  | 243 | 0.992 |
| EMA | No | 3x3 | 0.3 | 1 | 90  | 270 | 0.995 |
| EMA | No | 3x3 | 0.3 | 1 | 96  | 288 | 0.997 |
| EMA | No | 3x3 | 0.3 | 1 | 105 | 315 | 0.994 |
| EMA | No | 3x3 | 0.4 | 1 | 9   | 27  | 0.006 |
| EMA | No | 3x3 | 0.4 | 1 | 15  | 45  | 0.082 |
| EMA | No | 3x3 | 0.4 | 1 | 24  | 72  | 0.352 |
| EMA | No | 3x3 | 0.4 | 1 | 27  | 81  | 0.465 |
| EMA | No | 3x3 | 0.4 | 1 | 33  | 99  | 0.597 |
| EMA | No | 3x3 | 0.4 | 1 | 39  | 117 | 0.732 |

|     |    |     |     |   |     |     |       |
|-----|----|-----|-----|---|-----|-----|-------|
| EMA | No | 3x3 | 0.4 | 1 | 42  | 126 | 0.766 |
| EMA | No | 3x3 | 0.4 | 1 | 45  | 135 | 0.813 |
| EMA | No | 3x3 | 0.4 | 1 | 51  | 153 | 0.832 |
| EMA | No | 3x3 | 0.4 | 1 | 54  | 162 | 0.879 |
| EMA | No | 3x3 | 0.4 | 1 | 63  | 189 | 0.928 |
| EMA | No | 3x3 | 0.4 | 1 | 72  | 216 | 0.956 |
| EMA | No | 3x3 | 0.4 | 1 | 81  | 243 | 0.979 |
| EMA | No | 3x3 | 0.4 | 1 | 90  | 270 | 0.987 |
| EMA | No | 3x3 | 0.4 | 1 | 96  | 288 | 0.994 |
| EMA | No | 3x3 | 0.4 | 1 | 105 | 315 | 0.997 |
| EMA | No | 2x4 | 0.3 | 1 | 6   | 24  | 0.032 |
| EMA | No | 2x4 | 0.3 | 1 | 8   | 32  | 0.081 |
| EMA | No | 2x4 | 0.3 | 1 | 12  | 48  | 0.288 |
| EMA | No | 2x4 | 0.3 | 1 | 14  | 56  | 0.432 |
| EMA | No | 2x4 | 0.3 | 1 | 16  | 64  | 0.51  |
| EMA | No | 2x4 | 0.3 | 1 | 18  | 72  | 0.592 |
| EMA | No | 2x4 | 0.3 | 1 | 20  | 80  | 0.638 |
| EMA | No | 2x4 | 0.3 | 1 | 22  | 88  | 0.7   |
| EMA | No | 2x4 | 0.3 | 1 | 30  | 120 | 0.833 |
| EMA | No | 2x4 | 0.3 | 1 | 36  | 144 | 0.909 |
| EMA | No | 2x4 | 0.3 | 1 | 40  | 160 | 0.947 |
| EMA | No | 2x4 | 0.3 | 1 | 44  | 176 | 0.963 |
| EMA | No | 2x4 | 0.3 | 1 | 50  | 200 | 0.98  |
| EMA | No | 2x4 | 0.3 | 1 | 54  | 216 | 0.986 |
| EMA | No | 2x4 | 0.3 | 1 | 60  | 240 | 0.991 |
| EMA | No | 2x4 | 0.3 | 1 | 66  | 264 | 0.998 |
| EMA | No | 2x4 | 0.3 | 1 | 72  | 288 | 0.997 |
| EMA | No | 2x4 | 0.3 | 1 | 80  | 320 | 0.999 |
| EMA | No | 2x4 | 0.4 | 1 | 6   | 24  | 0.002 |
| EMA | No | 2x4 | 0.4 | 1 | 12  | 48  | 0.152 |
| EMA | No | 2x4 | 0.4 | 1 | 18  | 72  | 0.435 |
| EMA | No | 2x4 | 0.4 | 1 | 20  | 80  | 0.5   |
| EMA | No | 2x4 | 0.4 | 1 | 24  | 96  | 0.635 |
| EMA | No | 2x4 | 0.4 | 1 | 28  | 112 | 0.706 |
| EMA | No | 2x4 | 0.4 | 1 | 32  | 128 | 0.781 |
| EMA | No | 2x4 | 0.4 | 1 | 34  | 136 | 0.837 |
| EMA | No | 2x4 | 0.4 | 1 | 38  | 152 | 0.863 |
| EMA | No | 2x4 | 0.4 | 1 | 42  | 168 | 0.89  |
| EMA | No | 2x4 | 0.4 | 1 | 48  | 192 | 0.959 |
| EMA | No | 2x4 | 0.4 | 1 | 54  | 216 | 0.968 |
| EMA | No | 2x4 | 0.4 | 1 | 60  | 240 | 0.979 |

|     |     |     |     |   |     |     |       |
|-----|-----|-----|-----|---|-----|-----|-------|
| EMA | No  | 2x4 | 0.4 | 1 | 66  | 264 | 0.987 |
| EMA | No  | 2x4 | 0.4 | 1 | 72  | 288 | 0.996 |
| EMA | No  | 2x4 | 0.4 | 1 | 80  | 320 | 0.993 |
| FDA | Yes | 2x2 | 0.3 | 1 | 12  | 24  | 0.018 |
| FDA | Yes | 2x2 | 0.3 | 1 | 16  | 32  | 0.044 |
| FDA | Yes | 2x2 | 0.3 | 1 | 24  | 48  | 0.228 |
| FDA | Yes | 2x2 | 0.3 | 1 | 28  | 56  | 0.338 |
| FDA | Yes | 2x2 | 0.3 | 1 | 32  | 64  | 0.445 |
| FDA | Yes | 2x2 | 0.3 | 1 | 36  | 72  | 0.53  |
| FDA | Yes | 2x2 | 0.3 | 1 | 40  | 80  | 0.61  |
| FDA | Yes | 2x2 | 0.3 | 1 | 44  | 88  | 0.662 |
| FDA | Yes | 2x2 | 0.3 | 1 | 60  | 120 | 0.834 |
| FDA | Yes | 2x2 | 0.3 | 1 | 72  | 144 | 0.921 |
| FDA | Yes | 2x2 | 0.3 | 1 | 80  | 160 | 0.948 |
| FDA | Yes | 2x2 | 0.3 | 1 | 88  | 176 | 0.978 |
| FDA | Yes | 2x2 | 0.3 | 1 | 100 | 200 | 0.987 |
| FDA | Yes | 2x2 | 0.3 | 1 | 108 | 216 | 0.992 |
| FDA | Yes | 2x2 | 0.3 | 1 | 120 | 240 | 0.995 |
| FDA | Yes | 2x2 | 0.3 | 1 | 132 | 264 | 0.999 |
| FDA | Yes | 2x2 | 0.3 | 1 | 144 | 288 | 0.999 |
| FDA | Yes | 2x2 | 0.3 | 1 | 160 | 320 | 0.999 |
| FDA | Yes | 2x2 | 0.4 | 1 | 12  | 24  | 0.007 |
| FDA | Yes | 2x2 | 0.4 | 1 | 24  | 48  | 0.07  |
| FDA | Yes | 2x2 | 0.4 | 1 | 36  | 72  | 0.29  |
| FDA | Yes | 2x2 | 0.4 | 1 | 40  | 80  | 0.385 |
| FDA | Yes | 2x2 | 0.4 | 1 | 48  | 96  | 0.521 |
| FDA | Yes | 2x2 | 0.4 | 1 | 56  | 112 | 0.65  |
| FDA | Yes | 2x2 | 0.4 | 1 | 64  | 128 | 0.737 |
| FDA | Yes | 2x2 | 0.4 | 1 | 68  | 136 | 0.787 |
| FDA | Yes | 2x2 | 0.4 | 1 | 76  | 152 | 0.809 |
| FDA | Yes | 2x2 | 0.4 | 1 | 84  | 168 | 0.866 |
| FDA | Yes | 2x2 | 0.4 | 1 | 96  | 192 | 0.924 |
| FDA | Yes | 2x2 | 0.4 | 1 | 108 | 216 | 0.944 |
| FDA | Yes | 2x2 | 0.4 | 1 | 120 | 240 | 0.971 |
| FDA | Yes | 2x2 | 0.4 | 1 | 132 | 264 | 0.978 |
| FDA | Yes | 2x2 | 0.4 | 1 | 144 | 288 | 0.985 |
| FDA | Yes | 2x2 | 0.4 | 1 | 160 | 320 | 0.994 |
| FDA | Yes | 3x3 | 0.3 | 1 | 9   | 27  | 0.07  |
| FDA | Yes | 3x3 | 0.3 | 1 | 12  | 36  | 0.145 |
| FDA | Yes | 3x3 | 0.3 | 1 | 15  | 45  | 0.276 |
| FDA | Yes | 3x3 | 0.3 | 1 | 18  | 54  | 0.389 |

|     |     |     |     |   |     |     |       |
|-----|-----|-----|-----|---|-----|-----|-------|
| FDA | Yes | 3x3 | 0.3 | 1 | 21  | 63  | 0.494 |
| FDA | Yes | 3x3 | 0.3 | 1 | 24  | 72  | 0.579 |
| FDA | Yes | 3x3 | 0.3 | 1 | 27  | 81  | 0.677 |
| FDA | Yes | 3x3 | 0.3 | 1 | 30  | 90  | 0.749 |
| FDA | Yes | 3x3 | 0.3 | 1 | 39  | 117 | 0.832 |
| FDA | Yes | 3x3 | 0.3 | 1 | 48  | 144 | 0.937 |
| FDA | Yes | 3x3 | 0.3 | 1 | 54  | 162 | 0.943 |
| FDA | Yes | 3x3 | 0.3 | 1 | 60  | 180 | 0.977 |
| FDA | Yes | 3x3 | 0.3 | 1 | 66  | 198 | 0.985 |
| FDA | Yes | 3x3 | 0.3 | 1 | 75  | 225 | 0.992 |
| FDA | Yes | 3x3 | 0.3 | 1 | 81  | 243 | 0.995 |
| FDA | Yes | 3x3 | 0.3 | 1 | 90  | 270 | 0.995 |
| FDA | Yes | 3x3 | 0.3 | 1 | 96  | 288 | 0.999 |
| FDA | Yes | 3x3 | 0.3 | 1 | 105 | 315 | 0.998 |
| FDA | Yes | 3x3 | 0.4 | 1 | 9   | 27  | 0.094 |
| FDA | Yes | 3x3 | 0.4 | 1 | 15  | 45  | 0.265 |
| FDA | Yes | 3x3 | 0.4 | 1 | 24  | 72  | 0.605 |
| FDA | Yes | 3x3 | 0.4 | 1 | 27  | 81  | 0.708 |
| FDA | Yes | 3x3 | 0.4 | 1 | 33  | 99  | 0.816 |
| FDA | Yes | 3x3 | 0.4 | 1 | 39  | 117 | 0.902 |
| FDA | Yes | 3x3 | 0.4 | 1 | 42  | 126 | 0.92  |
| FDA | Yes | 3x3 | 0.4 | 1 | 45  | 135 | 0.949 |
| FDA | Yes | 3x3 | 0.4 | 1 | 51  | 153 | 0.951 |
| FDA | Yes | 3x3 | 0.4 | 1 | 54  | 162 | 0.97  |
| FDA | Yes | 3x3 | 0.4 | 1 | 63  | 189 | 0.996 |
| FDA | Yes | 3x3 | 0.4 | 1 | 72  | 216 | 0.996 |
| FDA | Yes | 3x3 | 0.4 | 1 | 81  | 243 | 0.999 |
| FDA | Yes | 3x3 | 0.4 | 1 | 90  | 270 | 1     |
| FDA | Yes | 3x3 | 0.4 | 1 | 96  | 288 | 1     |
| FDA | Yes | 3x3 | 0.4 | 1 | 105 | 315 | 1     |
| FDA | Yes | 2x4 | 0.3 | 1 | 6   | 24  | 0.041 |
| FDA | Yes | 2x4 | 0.3 | 1 | 8   | 32  | 0.058 |
| FDA | Yes | 2x4 | 0.3 | 1 | 12  | 48  | 0.15  |
| FDA | Yes | 2x4 | 0.3 | 1 | 14  | 56  | 0.234 |
| FDA | Yes | 2x4 | 0.3 | 1 | 16  | 64  | 0.308 |
| FDA | Yes | 2x4 | 0.3 | 1 | 18  | 72  | 0.399 |
| FDA | Yes | 2x4 | 0.3 | 1 | 20  | 80  | 0.471 |
| FDA | Yes | 2x4 | 0.3 | 1 | 22  | 88  | 0.557 |
| FDA | Yes | 2x4 | 0.3 | 1 | 30  | 120 | 0.764 |
| FDA | Yes | 2x4 | 0.3 | 1 | 36  | 144 | 0.855 |
| FDA | Yes | 2x4 | 0.3 | 1 | 40  | 160 | 0.89  |

|     |     |     |     |   |     |     |       |
|-----|-----|-----|-----|---|-----|-----|-------|
| FDA | Yes | 2x4 | 0.3 | 1 | 44  | 176 | 0.93  |
| FDA | Yes | 2x4 | 0.3 | 1 | 50  | 200 | 0.949 |
| FDA | Yes | 2x4 | 0.3 | 1 | 54  | 216 | 0.965 |
| FDA | Yes | 2x4 | 0.3 | 1 | 60  | 240 | 0.982 |
| FDA | Yes | 2x4 | 0.3 | 1 | 66  | 264 | 0.992 |
| FDA | Yes | 2x4 | 0.3 | 1 | 72  | 288 | 0.993 |
| FDA | Yes | 2x4 | 0.3 | 1 | 80  | 320 | 0.996 |
| FDA | Yes | 2x4 | 0.4 | 1 | 6   | 24  | 0.058 |
| FDA | Yes | 2x4 | 0.4 | 1 | 12  | 48  | 0.265 |
| FDA | Yes | 2x4 | 0.4 | 1 | 18  | 72  | 0.557 |
| FDA | Yes | 2x4 | 0.4 | 1 | 20  | 80  | 0.638 |
| FDA | Yes | 2x4 | 0.4 | 1 | 24  | 96  | 0.75  |
| FDA | Yes | 2x4 | 0.4 | 1 | 28  | 112 | 0.827 |
| FDA | Yes | 2x4 | 0.4 | 1 | 32  | 128 | 0.871 |
| FDA | Yes | 2x4 | 0.4 | 1 | 34  | 136 | 0.909 |
| FDA | Yes | 2x4 | 0.4 | 1 | 38  | 152 | 0.944 |
| FDA | Yes | 2x4 | 0.4 | 1 | 42  | 168 | 0.966 |
| FDA | Yes | 2x4 | 0.4 | 1 | 48  | 192 | 0.986 |
| FDA | Yes | 2x4 | 0.4 | 1 | 54  | 216 | 0.989 |
| FDA | Yes | 2x4 | 0.4 | 1 | 60  | 240 | 0.998 |
| FDA | Yes | 2x4 | 0.4 | 1 | 66  | 264 | 1     |
| FDA | Yes | 2x4 | 0.4 | 1 | 72  | 288 | 1     |
| FDA | Yes | 2x4 | 0.4 | 1 | 80  | 320 | 1     |
| FDA | No  | 2x2 | 0.3 | 1 | 12  | 24  | 0.028 |
| FDA | No  | 2x2 | 0.3 | 1 | 16  | 32  | 0.067 |
| FDA | No  | 2x2 | 0.3 | 1 | 24  | 48  | 0.259 |
| FDA | No  | 2x2 | 0.3 | 1 | 28  | 56  | 0.383 |
| FDA | No  | 2x2 | 0.3 | 1 | 32  | 64  | 0.498 |
| FDA | No  | 2x2 | 0.3 | 1 | 36  | 72  | 0.58  |
| FDA | No  | 2x2 | 0.3 | 1 | 40  | 80  | 0.641 |
| FDA | No  | 2x2 | 0.3 | 1 | 44  | 88  | 0.693 |
| FDA | No  | 2x2 | 0.3 | 1 | 60  | 120 | 0.876 |
| FDA | No  | 2x2 | 0.3 | 1 | 72  | 144 | 0.935 |
| FDA | No  | 2x2 | 0.3 | 1 | 80  | 160 | 0.955 |
| FDA | No  | 2x2 | 0.3 | 1 | 88  | 176 | 0.982 |
| FDA | No  | 2x2 | 0.3 | 1 | 100 | 200 | 0.986 |
| FDA | No  | 2x2 | 0.3 | 1 | 108 | 216 | 0.994 |
| FDA | No  | 2x2 | 0.3 | 1 | 120 | 240 | 0.997 |
| FDA | No  | 2x2 | 0.3 | 1 | 132 | 264 | 0.999 |
| FDA | No  | 2x2 | 0.3 | 1 | 144 | 288 | 0.999 |
| FDA | No  | 2x2 | 0.3 | 1 | 160 | 320 | 1     |

|     |    |     |     |   |     |     |       |
|-----|----|-----|-----|---|-----|-----|-------|
| FDA | No | 2x2 | 0.4 | 1 | 12  | 24  | 0.01  |
| FDA | No | 2x2 | 0.4 | 1 | 24  | 48  | 0.087 |
| FDA | No | 2x2 | 0.4 | 1 | 36  | 72  | 0.317 |
| FDA | No | 2x2 | 0.4 | 1 | 40  | 80  | 0.396 |
| FDA | No | 2x2 | 0.4 | 1 | 48  | 96  | 0.558 |
| FDA | No | 2x2 | 0.4 | 1 | 56  | 112 | 0.666 |
| FDA | No | 2x2 | 0.4 | 1 | 64  | 128 | 0.751 |
| FDA | No | 2x2 | 0.4 | 1 | 68  | 136 | 0.804 |
| FDA | No | 2x2 | 0.4 | 1 | 76  | 152 | 0.828 |
| FDA | No | 2x2 | 0.4 | 1 | 84  | 168 | 0.893 |
| FDA | No | 2x2 | 0.4 | 1 | 96  | 192 | 0.938 |
| FDA | No | 2x2 | 0.4 | 1 | 108 | 216 | 0.95  |
| FDA | No | 2x2 | 0.4 | 1 | 120 | 240 | 0.975 |
| FDA | No | 2x2 | 0.4 | 1 | 132 | 264 | 0.984 |
| FDA | No | 2x2 | 0.4 | 1 | 144 | 288 | 0.987 |
| FDA | No | 2x2 | 0.4 | 1 | 160 | 320 | 0.995 |
| FDA | No | 3x3 | 0.3 | 1 | 9   | 27  | 0.082 |
| FDA | No | 3x3 | 0.3 | 1 | 12  | 36  | 0.16  |
| FDA | No | 3x3 | 0.3 | 1 | 15  | 45  | 0.284 |
| FDA | No | 3x3 | 0.3 | 1 | 18  | 54  | 0.395 |
| FDA | No | 3x3 | 0.3 | 1 | 21  | 63  | 0.5   |
| FDA | No | 3x3 | 0.3 | 1 | 24  | 72  | 0.563 |
| FDA | No | 3x3 | 0.3 | 1 | 27  | 81  | 0.681 |
| FDA | No | 3x3 | 0.3 | 1 | 30  | 90  | 0.745 |
| FDA | No | 3x3 | 0.3 | 1 | 39  | 117 | 0.845 |
| FDA | No | 3x3 | 0.3 | 1 | 48  | 144 | 0.938 |
| FDA | No | 3x3 | 0.3 | 1 | 54  | 162 | 0.948 |
| FDA | No | 3x3 | 0.3 | 1 | 60  | 180 | 0.969 |
| FDA | No | 3x3 | 0.3 | 1 | 66  | 198 | 0.981 |
| FDA | No | 3x3 | 0.3 | 1 | 75  | 225 | 0.995 |
| FDA | No | 3x3 | 0.3 | 1 | 81  | 243 | 0.995 |
| FDA | No | 3x3 | 0.3 | 1 | 90  | 270 | 0.996 |
| FDA | No | 3x3 | 0.3 | 1 | 96  | 288 | 0.998 |
| FDA | No | 3x3 | 0.3 | 1 | 105 | 315 | 0.996 |
| FDA | No | 3x3 | 0.4 | 1 | 9   | 27  | 0.096 |
| FDA | No | 3x3 | 0.4 | 1 | 15  | 45  | 0.278 |
| FDA | No | 3x3 | 0.4 | 1 | 24  | 72  | 0.598 |
| FDA | No | 3x3 | 0.4 | 1 | 27  | 81  | 0.72  |
| FDA | No | 3x3 | 0.4 | 1 | 33  | 99  | 0.808 |
| FDA | No | 3x3 | 0.4 | 1 | 39  | 117 | 0.904 |
| FDA | No | 3x3 | 0.4 | 1 | 42  | 126 | 0.925 |

|     |    |     |     |   |     |     |       |
|-----|----|-----|-----|---|-----|-----|-------|
| FDA | No | 3x3 | 0.4 | 1 | 45  | 135 | 0.946 |
| FDA | No | 3x3 | 0.4 | 1 | 51  | 153 | 0.952 |
| FDA | No | 3x3 | 0.4 | 1 | 54  | 162 | 0.976 |
| FDA | No | 3x3 | 0.4 | 1 | 63  | 189 | 0.992 |
| FDA | No | 3x3 | 0.4 | 1 | 72  | 216 | 0.997 |
| FDA | No | 3x3 | 0.4 | 1 | 81  | 243 | 0.998 |
| FDA | No | 3x3 | 0.4 | 1 | 90  | 270 | 1     |
| FDA | No | 3x3 | 0.4 | 1 | 96  | 288 | 0.999 |
| FDA | No | 3x3 | 0.4 | 1 | 105 | 315 | 0.999 |
| FDA | No | 2x4 | 0.3 | 1 | 6   | 24  | 0.035 |
| FDA | No | 2x4 | 0.3 | 1 | 8   | 32  | 0.057 |
| FDA | No | 2x4 | 0.3 | 1 | 12  | 48  | 0.163 |
| FDA | No | 2x4 | 0.3 | 1 | 14  | 56  | 0.231 |
| FDA | No | 2x4 | 0.3 | 1 | 16  | 64  | 0.316 |
| FDA | No | 2x4 | 0.3 | 1 | 18  | 72  | 0.397 |
| FDA | No | 2x4 | 0.3 | 1 | 20  | 80  | 0.458 |
| FDA | No | 2x4 | 0.3 | 1 | 22  | 88  | 0.546 |
| FDA | No | 2x4 | 0.3 | 1 | 30  | 120 | 0.745 |
| FDA | No | 2x4 | 0.3 | 1 | 36  | 144 | 0.847 |
| FDA | No | 2x4 | 0.3 | 1 | 40  | 160 | 0.887 |
| FDA | No | 2x4 | 0.3 | 1 | 44  | 176 | 0.924 |
| FDA | No | 2x4 | 0.3 | 1 | 50  | 200 | 0.949 |
| FDA | No | 2x4 | 0.3 | 1 | 54  | 216 | 0.962 |
| FDA | No | 2x4 | 0.3 | 1 | 60  | 240 | 0.979 |
| FDA | No | 2x4 | 0.3 | 1 | 66  | 264 | 0.991 |
| FDA | No | 2x4 | 0.3 | 1 | 72  | 288 | 0.993 |
| FDA | No | 2x4 | 0.3 | 1 | 80  | 320 | 0.997 |
| FDA | No | 2x4 | 0.4 | 1 | 6   | 24  | 0.047 |
| FDA | No | 2x4 | 0.4 | 1 | 12  | 48  | 0.266 |
| FDA | No | 2x4 | 0.4 | 1 | 18  | 72  | 0.558 |
| FDA | No | 2x4 | 0.4 | 1 | 20  | 80  | 0.627 |
| FDA | No | 2x4 | 0.4 | 1 | 24  | 96  | 0.74  |
| FDA | No | 2x4 | 0.4 | 1 | 28  | 112 | 0.795 |
| FDA | No | 2x4 | 0.4 | 1 | 32  | 128 | 0.86  |
| FDA | No | 2x4 | 0.4 | 1 | 34  | 136 | 0.91  |
| FDA | No | 2x4 | 0.4 | 1 | 38  | 152 | 0.938 |
| FDA | No | 2x4 | 0.4 | 1 | 42  | 168 | 0.96  |
| FDA | No | 2x4 | 0.4 | 1 | 48  | 192 | 0.989 |
| FDA | No | 2x4 | 0.4 | 1 | 54  | 216 | 0.989 |
| FDA | No | 2x4 | 0.4 | 1 | 60  | 240 | 0.997 |
| FDA | No | 2x4 | 0.4 | 1 | 66  | 264 | 0.999 |

|     |    |     |     |   |    |     |   |
|-----|----|-----|-----|---|----|-----|---|
| FDA | No | 2x4 | 0.4 | 1 | 72 | 288 | 1 |
| FDA | No | 2x4 | 0.4 | 1 | 80 | 320 | 1 |
